# Supplementary material for: Disease risk scores for skin cancers
Source: PubMed Central journal article supplement (PMC7794415; doi:10.1038/s41467-020-20246-5), 2021-01-08

***Supplementary information for***

**Disease risk scores for skin cancers**

*Pierre Fontanillas, Babak Alipanahi, Nicholas A. Furlotte, Michaela Johnson, Catherine Wilson, 23andMe Research Team, Steve Pitts, Robert Gentleman, Adam Auton*

**Supplementary Table 1: Training and validation set statistics and demographics.**

*Percentages are computed for each column based on the sample size of the column. Longitudinal data were collected with a yearly followup survey in 2018 and 2019.*

|                                        |             | TRAINING SET   |         |       | VALIDATION SET     |         |       |                    |         |       |
|----------------------------------------|-------------|----------------|---------|-------|--------------------|---------|-------|--------------------|---------|-------|
|                                        |             |                |         |       | <i>At baseline</i> |         |       | <i>Prospective</i> |         |       |
|                                        |             | All            | Females | Males | All                | Females | Males | All                | Females | Males |
| <b>Sample size</b>                     |             | <b>103,008</b> | 57.4%   | 42.6% | <b>88,924</b>      | 61.1%   | 38.9% | <b>49,501</b>      | 63.9%   | 36.1% |
| <b>BCC</b>                             |             | 14.5%          | 13.7%   | 15.5% | 18.2%              | 16.9%   | 20.1% | 18.8%              | 17.3%   | 21.4% |
| <b>SCC</b>                             |             | 7.3%           | 6.6%    | 8.1%  | 8.9%               | 8.1%    | 10.2% | 9.3%               | 8.4%    | 11.0% |
| <b>Melanoma</b>                        |             | 3.9%           | 3.4%    | 4.5%  | 4.7%               | 4.1%    | 5.6%  | 4.6%               | 4.0%    | 5.6%  |
| <b>Incident BCC</b>                    |             | -              | -       | -     | -                  | -       | -     | 2.3%               | 1.9%    | 3.0%  |
| <b>Incident SCC</b>                    |             | -              | -       | -     | -                  | -       | -     | 1.7%               | 1.4%    | 2.3%  |
| <b>Incident Melanoma</b>               |             | -              | -       | -     | -                  | -       | -     | 0.6%               | 0.5%    | 0.8%  |
| <b>Family history of skin cancer</b>   |             | 17.7%          | 19.8%   | 14.9% | 16.4%              | 18.3%   | 13.4% | 17.4%              | 19.2%   | 14.2% |
| <b>Family history of other cancers</b> |             | 44.6%          | 44.7%   | 44.4% | 46.8%              | 46.4%   | 47.3% | 48.1%              | 47.4%   | 49.3% |
| <b>Age</b>                             | 30-50 years | 30.6%          | 29.4%   | 32.1% | 30.3%              | 31.9%   | 27.9% | 27.8%              | 29.9%   | 24.1% |
|                                        | 50-70       | 47.6%          | 50.6%   | 43.4% | 49.1%              | 50.3%   | 47.1% | 50.5%              | 51.5%   | 48.8% |
|                                        | 70-90       | 21.9%          | 20.0%   | 24.4% | 20.6%              | 17.8%   | 25.0% | 21.7%              | 18.6%   | 27.1% |
| <b>BMI</b>                             | <25         | 38.1%          | 44.8%   | 29.1% | 33.9%              | 41.0%   | 23.0% | 34.5%              | 40.8%   | 23.6% |
|                                        | 25-30       | 35.3%          | 28.8%   | 43.9% | 35.6%              | 29.8%   | 44.4% | 35.1%              | 29.9%   | 44.3% |
|                                        | 30-35       | 16.3%          | 14.8%   | 18.3% | 18.5%              | 16.3%   | 22.0% | 18.1%              | 16.2%   | 21.4% |
|                                        | >35         | 10.3%          | 11.5%   | 8.7%  | 12.0%              | 12.9%   | 10.7% | 12.2%              | 13.2%   | 10.6% |
| <b>Education</b>                       | High school | 5.0%           | 5.7%    | 4.0%  | 5.7%               | 6.4%    | 4.9%  | 5.3%               | 6.2%    | 4.0%  |
|                                        | College     | 53.7%          | 56.1%   | 50.5% | 53.9%              | 57.6%   | 48.6% | 54.4%              | 57.3%   | 49.8% |
|                                        | Graduate    | 41.3%          | 38.2%   | 45.4% | 40.3%              | 36.1%   | 46.5% | 40.2%              | 36.5%   | 46.2% |
| <b>Smoking</b>                         | Ever        | 40.9%          | 40.0%   | 42.2% | 42.5%              | 40.6%   | 45.3% | 41.4%              | 39.8%   | 44.2% |
|                                        | Current     | 6.4%           | 6.6%    | 6.2%  | 7.9%               | 8.2%    | 7.5%  | 6.7%               | 7.1%    | 6.0%  |
| <b>Live in metropolitan area</b>       |             | 90.7%          | 89.8%   | 91.9% | 88.4%              | 88.0%   | 89.1% | 88.6%              | 88.0%   | 89.5% |

## Supplementary Table 2: Skin (and blood) cancer survey.

*Only the questions related to skin cancer were used in this study.*

### Personal History of Cancer:

- 1) In what year were you born?
- 2) What is your sex?
- 3) Have you ever been diagnosed with or treated for any form of blood cancer including the following?
- 4) Have you ever been diagnosed with or treated for any form of skin cancer or skin pre-cancer including the following?
- 5) Have you ever had an abnormal pap smear?
- 6) Have you ever had 10 or more polyps in your colon?
- 7) Have you ever been diagnosed with or treated for another type of cancer?
- 8) What other form(s) of cancer were you diagnosed with or treated for?
- 9) Have you ever been diagnosed with or treated for another type of cancer?
- 10) What other form(s) of cancer were you diagnosed with or treated for?
- 11) Have you ever been diagnosed with any of these hereditary cancer syndromes?
- 12) Which of the following blood cancers were you diagnosed with or treated for?
- 13) Have you ever been diagnosed with or treated for basal cell carcinoma?
- 14) Where on your body are/were your basal cell carcinomas located?
- 15) What treatments have you received for basal cell carcinoma?
- 16) How many basal cell carcinomas have you had in the last 2 years?
- 17) How old were you when you were first diagnosed with basal cell carcinoma?
- 18) By whom were you diagnosed with basal cell carcinoma?
- 19) Have you ever been diagnosed with or treated for squamous cell carcinoma?
- 20) Where on your body are/were your squamous cell carcinomas located?
- 21) What treatments have you received for squamous cell carcinoma?
- 22) How many squamous cell carcinomas have you had in the last 2 years?
- 23) How old were you when you were first diagnosed with squamous cell carcinoma?
- 24) By whom were you diagnosed with squamous cell carcinoma?
- 25) Have you ever been diagnosed with or treated for melanoma?
- 26) Where on your body are/were your melanomas located?
- 27) What types of moles did your melanoma(s) develop from?
- 28) What treatments have you received for melanoma?
- 29) How many melanomas have you had in the last 2 years?
- 30) How old were you when you were first diagnosed with melanoma?
- 31) By whom were you diagnosed with melanoma?
- 32) Have you ever been diagnosed with or treated for actinic keratosis?
- 33) Where on your body are/were your actinic keratoses located?
- 34) Have you ever had any of the following treatments for actinic keratosis?
- 35) How many actinic keratoses have you had treated in the past 2 years?
- 36) How old were you when you were first diagnosed with actinic keratosis?
- 37) By whom were you diagnosed with actinic keratosis?
- 38) Prior to your cancer diagnosis, how would you rate your general health?
- 39) Prior to your cancer diagnosis, how would you rate your stress level?

### Risk Factors:

- 1) Which of the following best describes your skin color?
- 2) Which best describes the natural color of your hair?
- 3) How much lighter does your hair become when directly exposed to sun for 3-4 hours?
- 4) Which best describes the amount of red in your hair?
- 5) Which of the following best describes your natural eye color?
- 6) How many freckles total do you have on your face and body?
- 7) How does your skin respond when directly exposed to sun for 3-4 hours?
- 8) Have you ever had several large moles (1/4 inch or 6mm, flat or raised)?
- 9) Have you ever had a mole removed or biopsied that tested positive for abnormal cells (dysplasia)?
- 10) How many moles do you have on your right arm?
- 11) In what country and postal code do you currently live?
- 12) In what country and postal code did you spend the majority of your adulthood, age of 18 and older?
- 13) In what country and postal code did you spend the majority of your childhood, before the age of 18?
- 14) How often did you sunbathe before the age of 30?
- 15) On a typical weekday, how many hours or minutes (select one) of sun exposure do you get?
- 16) On a typical weekend day, how many hours or minutes (select one) of sun exposure do you get?
- 17) How many sunburns that caused blisters have you had?
- 18) How many times have you used indoor tanning equipment?
- 19) Have you ever been employed for a year or more in a job where you worked outdoors in the sunlight?
- 20) How many years were you employed in a job where you worked outdoors in the sunlight?
- 21) Have you smoked at least 100 cigarettes in your entire life?
- 22) Do you typically smoke cigarettes every day, some days, or not at all?
- 23) Is your family's history of cancer completely unknown to you for some reason, such as being adopted?

### Family History of Cancer:

- 1) Your mother?
- 2) Your father?
- 3) Your sibling(s)?
- 4) Your child(ren)?
- 5) How many biological siblings do you have?
- 6) How many biological children do you have?
- 7) What type(s) of cancer was your biological mother diagnosed with or treated for?
- 8) What type(s) of skin cancer was your biological mother diagnosed with?
- 9) What type(s) of cancer was your biological father diagnosed with or treated for?
- 10) What type(s) of skin cancer was your biological father diagnosed with?
- 11) How many of your biological siblings have ever had cancer?
- 12) What type(s) of cancer was your biological sibling(s) diagnosed with or treated for?
- 13) What type(s) of skin cancer was your biological sibling(s) diagnosed with?
- 14) How many of your biological children have ever had cancer?
- 15) What type(s) of cancer was your biological child(ren) diagnosed with or treated for?
- 16) What type(s) of skin cancer was your biological child(ren) diagnosed with?
- 17) Have any of your biological parents, siblings, or children ever been diagnosed with any of these hereditary cancer syndromes?

## Supplementary Table 3: Additional tested phenotypes from 23andMe database.

A total of 608 phenotypes were selected, with a maximum of 50% of missing data for the participants in the training set.

|                                                                                                                                                                                                                                                                                                                                                                                                                                                                                                                                                                                                                                                                                                                                                                                                                                                                                                                                                                                                                                                                                                                                                                                                                                                                                                                                                                                         |                                                                                                                                                                                                                                                                                                                                                                |                                                                                                                                                                                                                                                                                                                                                                                                                                                                                                                                                                                                      |                                                                                                                                                                                                                                                                                                                                                                                                                                                                                                                                                                                                                                                                                                                                                                                                                                                                                                                                                                                                                                                                                                                                                                                                                                                                                                                                                                                                                                                                                                                                                                                                                                                                                                                                                                                                                                                                                                                                                                                                                                                                                                                                                                                                                                                                                                                               |                                                                                                                                                                                                             |                                                                                                                                                                                                                                                                                                                                                                |                                                                                                                                         |                                                                                                                                                                               |                                                                                                                                                                                                                                                                                                                  |
|-----------------------------------------------------------------------------------------------------------------------------------------------------------------------------------------------------------------------------------------------------------------------------------------------------------------------------------------------------------------------------------------------------------------------------------------------------------------------------------------------------------------------------------------------------------------------------------------------------------------------------------------------------------------------------------------------------------------------------------------------------------------------------------------------------------------------------------------------------------------------------------------------------------------------------------------------------------------------------------------------------------------------------------------------------------------------------------------------------------------------------------------------------------------------------------------------------------------------------------------------------------------------------------------------------------------------------------------------------------------------------------------|----------------------------------------------------------------------------------------------------------------------------------------------------------------------------------------------------------------------------------------------------------------------------------------------------------------------------------------------------------------|------------------------------------------------------------------------------------------------------------------------------------------------------------------------------------------------------------------------------------------------------------------------------------------------------------------------------------------------------------------------------------------------------------------------------------------------------------------------------------------------------------------------------------------------------------------------------------------------------|-------------------------------------------------------------------------------------------------------------------------------------------------------------------------------------------------------------------------------------------------------------------------------------------------------------------------------------------------------------------------------------------------------------------------------------------------------------------------------------------------------------------------------------------------------------------------------------------------------------------------------------------------------------------------------------------------------------------------------------------------------------------------------------------------------------------------------------------------------------------------------------------------------------------------------------------------------------------------------------------------------------------------------------------------------------------------------------------------------------------------------------------------------------------------------------------------------------------------------------------------------------------------------------------------------------------------------------------------------------------------------------------------------------------------------------------------------------------------------------------------------------------------------------------------------------------------------------------------------------------------------------------------------------------------------------------------------------------------------------------------------------------------------------------------------------------------------------------------------------------------------------------------------------------------------------------------------------------------------------------------------------------------------------------------------------------------------------------------------------------------------------------------------------------------------------------------------------------------------------------------------------------------------------------------------------------------------|-------------------------------------------------------------------------------------------------------------------------------------------------------------------------------------------------------------|----------------------------------------------------------------------------------------------------------------------------------------------------------------------------------------------------------------------------------------------------------------------------------------------------------------------------------------------------------------|-----------------------------------------------------------------------------------------------------------------------------------------|-------------------------------------------------------------------------------------------------------------------------------------------------------------------------------|------------------------------------------------------------------------------------------------------------------------------------------------------------------------------------------------------------------------------------------------------------------------------------------------------------------|
| <b>Addiction:</b><br>current tobacco user<br>ever tobacco user<br>hp alcohol 2wks<br>hp smoked 1000 cigarettes                                                                                                                                                                                                                                                                                                                                                                                                                                                                                                                                                                                                                                                                                                                                                                                                                                                                                                                                                                                                                                                                                                                                                                                                                                                                          | varicose veins legs                                                                                                                                                                                                                                                                                                                                            | mosquito severe                                                                                                                                                                                                                                                                                                                                                                                                                                                                                                                                                                                      | otosclerosis                                                                                                                                                                                                                                                                                                                                                                                                                                                                                                                                                                                                                                                                                                                                                                                                                                                                                                                                                                                                                                                                                                                                                                                                                                                                                                                                                                                                                                                                                                                                                                                                                                                                                                                                                                                                                                                                                                                                                                                                                                                                                                                                                                                                                                                                                                                  | haircolor                                                                                                                                                                                                   |                                                                                                                                                                                                                                                                                                                                                                |                                                                                                                                         |                                                                                                                                                                               |                                                                                                                                                                                                                                                                                                                  |
| <b>Autoimmune:</b><br>alopecia areata<br>ankylosing spondylitis<br>antiphospholipid syndrome<br>any autoimmune<br>autoimmune hepatitis<br>canker sore<br>canker sore pastyear<br>canker sores qt<br>celiac<br>celiac w biopsy<br>crohns<br>crohns or ulcerative colitis<br>juvenile t1d<br>lupus<br>multiple sclerosis<br>pediatric ibd<br>polymyalgia rheumatica<br>psoriasis<br>psoriatic arthritis<br>psoriatic arthritis unfiltered<br>rheumatoid arthritis<br>sarcoidosis<br>scleroderma<br>sjogrens syndrome<br>t1d<br>ulcerative colitis<br>vitiligo                                                                                                                                                                                                                                                                                                                                                                                                                                                                                                                                                                                                                                                                                                                                                                                                                             | <b>Cognitive:</b><br>clap to beat<br>education meta<br>education years<br>math class<br>play music before age 8<br>plays a musical instrument<br>self rated math ability<br>sing back musical note                                                                                                                                                             | mycin drug allergy clean<br>no allergies<br>nonallergic asthma<br>peanut allergy clean<br>penicillin allergy clean<br>poison oak<br>pollen allergy<br>pollen allergy clean<br>pollen allergy meta<br>red ants allergy clean<br>rhinitis<br>seasonal allergies broad<br>severe asthma<br>shellfish allergy clean<br>soy allergy clean<br>sulfa drug allergy clean<br>tree nuts allergy clean<br>trees allergy clean<br>weary loss<br>weeds allergy clean<br>wheat allergy clean<br>yellow jackets allergy clean                                                                                       | pagets<br>scoliosis<br>surgery shoulder dislocation<br>tmj                                                                                                                                                                                                                                                                                                                                                                                                                                                                                                                                                                                                                                                                                                                                                                                                                                                                                                                                                                                                                                                                                                                                                                                                                                                                                                                                                                                                                                                                                                                                                                                                                                                                                                                                                                                                                                                                                                                                                                                                                                                                                                                                                                                                                                                                    | haircolor rough<br>red hair amount<br>red hair cc<br>red hair vs blond and light brown c                                                                                                                    |                                                                                                                                                                                                                                                                                                                                                                |                                                                                                                                         |                                                                                                                                                                               |                                                                                                                                                                                                                                                                                                                  |
| <b>Blood:</b><br>anemia<br>blood clots<br>bleeds thinner meds<br>bruise easily<br>deep vein thrombosis<br>hypocoagulation<br>nose bleeds<br>pulmonary embolism                                                                                                                                                                                                                                                                                                                                                                                                                                                                                                                                                                                                                                                                                                                                                                                                                                                                                                                                                                                                                                                                                                                                                                                                                          | <b>Diet:</b><br>daily fruit servings<br>fruit juice frequency<br>hp diet quality<br>leafy greens frequency<br>pastry frequency<br>red meat servings<br>vegan<br>vegetable servings<br>vegetarian<br>yogurt frequency                                                                                                                                           | <b>Infection:</b><br>bacterial meningitis<br>chicken pox<br>childhood ear infections<br>chronic sinus infections<br>cold sores<br>colds last year<br>gingivitis<br>hepatitis<br>hepatitis a<br>hepatitis b<br>hepatitis c<br>hwiz hepatitis ebv<br>intestinal parasite<br>lyme disease<br>lyme disease<br>malaria meds<br>mononucleosis<br>mumps<br>plantar warts<br>plantar warts<br>pneumonia<br>pneumonia frequency<br>positive tb test<br>scarlet fever<br>shingles<br>strep throat<br>toenail fungus<br>tonsillectomy<br>tuberculosis<br>untreated tract inf<br>uti frequency<br>whooping cough | <b>Neurological:</b><br>alzheimers<br>alzheimers fh<br>childhood febrile seizures<br>chronic fatigue<br>cluster headaches<br>db neuropathy<br>dyslexia<br>epilepsy<br>essential tremor<br>HIP chronic pain<br>leg jiggle<br>lou gehrigs<br>memory loss<br>migraine diagnosis<br>migraine diagnosis broad<br>migraine ICHD<br>migraine ICHD with aura<br>migraine ICHD without aura<br>numb extremities<br>photc sneeze<br>prognosis<br>restless leg syndrome<br>restless leg syndrome<br>sma dx<br>trigeminal neuralgia                                                                                                                                                                                                                                                                                                                                                                                                                                                                                                                                                                                                                                                                                                                                                                                                                                                                                                                                                                                                                                                                                                                                                                                                                                                                                                                                                                                                                                                                                                                                                                                                                                                                                                                                                                                                       | <b>Pregnancy:</b><br>gestational diabetes pc<br>hbp or preeclampsia pc<br>preeclampsia or hbp                                                                                                               |                                                                                                                                                                                                                                                                                                                                                                |                                                                                                                                         |                                                                                                                                                                               |                                                                                                                                                                                                                                                                                                                  |
| <b>Cancer:</b><br>any cancer<br>any non melanoma skin cancer<br>any non skin cancer<br>any recurrent somatic<br>any skin cancer<br>barretts esophagus<br>basal cell carcinoma<br>bladder cancer<br>bladder cancer dx or fh<br>bladder cancer fh<br>brain cancer<br>brain cancer dx or fh<br>brain cancer fh<br>breast cancer<br>breast cancer dx or fh<br>breast cancer fh<br>breast or ovarian cancer<br>cervical cancer<br>chemotherapy meds<br>colon polyps<br>colorectal cancer<br>colorectal cancer dx or fh<br>colorectal cancer fh<br>dmm3a r82x v4<br>er positive breast cancer<br>hodgkins lymphoma<br>hodgkins lymphoma dx or fh<br>hodgkins lymphoma fh<br>jak2 v617f cc<br>kidney cancer<br>leukemia<br>leukemia dx or fh<br>leukemia fh<br>lipoma<br>lung cancer<br>lung cancer dx or fh<br>lung cancer fh<br>melanoma<br>melanoma dx or fh<br>melanoma fh<br>mpn or v617f<br>non hodgkins lymphoma<br>non hodgkins lymphoma dx or fh<br>non hodgkins lymphoma fh<br>ovarian cancer<br>ovarian cancer dx or fh<br>ovarian cancer fh<br>pancreatic cancer<br>pancreatic cancer dx or fh<br>pancreatic cancer fh<br>prostate cancer dx or fh<br>prostate cancer fh<br>prostate cancer fh<br>radiation therapy<br>squamous cell carcinoma<br>stomach cancer<br>stomach cancer dx or fh<br>stomach cancer fh<br>thyroid cancer<br>thyroid cancer dx or fh<br>thyroid cancer fh | <b>Endocrine:</b><br>graves<br>hashimotos<br>hyperthyroidism<br>hypothyroidism                                                                                                                                                                                                                                                                                 | <b>Lifestyle:</b><br>breakfast frequency<br>hp exercise intake<br>short of breath from stairs<br>tanning bed use                                                                                                                                                                                                                                                                                                                                                                                                                                                                                     | <b>Personality:</b><br>ability handle stress<br>adventurous<br>amount of stress<br>appreciates art music or literature<br>can be cold and aloof<br>can be moody<br>can be somewhat careless<br>can be tense<br>car accidents<br>center of attention<br>coffee spilled anger<br>comfort taking risks<br>criticized anger<br>cry easily<br>cut off freeway anger<br>desk clean<br>does a thorough job<br>does things efficiently<br>extraversion combined<br>fear of speaking<br>generates a lot of enthusiasm<br>gets nervous easily<br>has a forgiving nature<br>has an active imagination<br>has an assertive personality<br>has few artistic interests<br>heated argments frequency<br>hothead<br>interruptions anger<br>is considerate and kind to almost everyone<br>is depressed often feels sad<br>is easily distracted<br>is emotionally stable not easily upset<br>is full of energy<br>is generally trusting<br>is ingenious a deep thinker<br>is inventive<br>is original comes up with new ideas<br>is outgoing sociable<br>is relaxed handles stress well<br>is reserved<br>is sometimes rude to others<br>is sometimes shy inhibited<br>is talkative<br>left out social activity<br>life satisfaction<br>life satisfaction<br>likes to cooperate with others<br>likes to reflect play with ideas<br>makes plans and follows through with them<br>nail biting frequency<br>narcissism<br>organizer<br>perseveres until the task is finished<br>personality activity<br>personality aesthetics<br>personality agreeableness<br>personality altruism<br>personality anxiety<br>personality assertiveness<br>personality compliance<br>personality conscientiousness<br>personality depression<br>personality extraversion<br>personality ideas<br>personality neuroticism<br>personality openness<br>personality order<br>personality self discipline<br>prefers work that is routine<br>recharge by socializing<br>remains calm in tense situations<br>se failure<br>se positive attitude<br>se satisfaction with self<br>self rated attractiveness<br>shyness<br>social support<br>stammer<br>starts quarrels with others<br>talks with friends<br>tends to be disorganized<br>tends to be lazy<br>tends to be quiet<br>tends to find fault with others<br>values artistic aesthetic experiences<br>worries a lot | <b>Renal:</b><br>chronic kidney disease<br>db nephritis<br>HIP urinary condition<br>HIP urinary condition type OAB<br>HIP urinary condition type SUI<br>kidney disease<br>kidney infection<br>kidney stones | <b>Reproductive:</b><br>endometriosis<br>ever pregnant<br>female infertility<br>fraternal twin<br>identical twin<br>ivf<br>pcos<br>three plus losses                                                                                                                                                                                                           | <b>Respiratory:</b><br>bronchitis frequency<br>chronic bronchitis<br>COPD<br>cystic fibrosis<br>ear of speaking<br>epistaxia<br>HIP IPP | <b>Sensation:</b><br>ability to smell<br>anosmia<br>carsick<br>congenital deafness<br>good sense of direction<br>hearing aid<br>misophonia<br>motionsick combined<br>tinnitus | <b>Skin:</b><br>acne as teenager<br>actinic keratosis<br>dandruff frequency<br>dry skin frequency<br>foot odor<br>hidradenitis<br>lichen planus<br>moles<br>rosacea all<br>severe acne<br>shampoo type<br>skin tags<br>stretch marks<br>stretch marks any<br>sweat during workout<br>sweaty feet<br>sweaty palms |
| <b>Cardiovascular:</b><br>angina<br>any cad<br>any cvd<br>aortic aneurysm<br>aortic stenosis<br>arrhythmia<br>atrial fibrillation<br>blood pressure meds<br>brain aneurysm<br>carotid artery dis<br>chest pain exercise<br>congenital heart defect<br>early onset heart attack<br>fainted giving blood<br>heart attack<br>heart failure<br>high blood pressure<br>long qt syndrome<br>myocarditis<br>orthostatic hypotension<br>peripheral artery dis<br>raynauds<br>stroke                                                                                                                                                                                                                                                                                                                                                                                                                                                                                                                                                                                                                                                                                                                                                                                                                                                                                                             | <b>Eyes:</b><br>astigmatism<br>cataract<br>cry cutting onions<br>db retinopathy<br>dry eyes treatment<br>farsightedness<br>glaucoma<br>HIP iritis<br>HIP macular degen type dry<br>HIP macular degen type wet<br>myopia v hyperopia<br>nearsightedness<br>optic neuritis<br>retinal detachment<br>retinal vein occlusion<br>retinitis pigmentosa<br>strabismus | <b>Longevity:</b><br>centenarian family<br>general health<br>healthy old<br>wasp metabolic disease burden<br>nonagenarian<br>nonagenarian parent<br>trouble walking                                                                                                                                                                                                                                                                                                                                                                                                                                  | <b>Metabolic:</b><br>altitude sickness<br>birth weight<br>blood sugar meds<br>bmi<br>bmi res tx<br>dairy products indigestion<br>gout<br>hemochromatosis<br>high chol<br>high cholesterol<br>high cholesterol broad<br>high cholesterol dx<br>high cholesterol meds<br>high plasma glucose<br>hyperglycemia<br>lactose intolerant loose<br>lost 20lbs<br>low hdl<br>modtosevere altitude sickness<br>nafld<br>nash<br>spit frequency<br>t2d<br>t2d broad<br>weight<br>weight description<br>weight res tx                                                                                                                                                                                                                                                                                                                                                                                                                                                                                                                                                                                                                                                                                                                                                                                                                                                                                                                                                                                                                                                                                                                                                                                                                                                                                                                                                                                                                                                                                                                                                                                                                                                                                                                                                                                                                     | <b>Morphology:</b><br>braces<br>cleft lip<br>cleft palate<br>extra toe<br>forward splits<br>height<br>height res tx<br>overbite<br>third nipple<br>tongue curl<br>wiggle ears                               | <b>Musculoskeletal:</b><br>back pain frequency<br>bunions<br>carpal tunnel<br>dupuytrens contracture<br>fibromyalgia<br>fibromyalgia chronic fatigue<br>fracture<br>ganglion cyst foot<br>ganglion cyst wrist<br>hirs chlers danlos<br>muscular dystrophy<br>myasthenia gravis<br>osteoarthritis<br>osteoarthritis broad<br>osteoporosis<br>osteoporosis broad | <b>Pigmentation:</b><br>age gray<br>any freckles<br>eyecolor<br>eyecolor simple<br>freckle combined qt<br>gray amount                   | <b>Teeth:</b><br>biting with teeth<br>cavities many<br>dental superstar<br>flossing frequency<br>number of cavities<br>teeth grinding                                         |                                                                                                                                                                                                                                                                                                                  |

**Supplementary Table S4: General linear model (GLM with binomial response) results for the best model (20-risk factor model) including factors from the cancer survey.**

All the linear coefficients were converted to Odds Ratios (OR) after fixing to OR=1 the first level for binary or categorical factors, or the minimum class for continuous factors. The 95% CI, P-values (\*: <0.05; \*\*: <0.01; \*\*\*: <0.001), and the deviance explained are shown. For continuous factors (Age and Typical sun exposure per week), distributions were sliced per class and a OR is recomputed per class (P-value were not recomputed for each class). Models also include the five first principal components (PCs) controlling for ancestry.

| Variable                                                    | Level                | BCC                  | SCC                  | Melanoma             |
|-------------------------------------------------------------|----------------------|----------------------|----------------------|----------------------|
| <b>Age</b>                                                  |                      | <b>9.87%</b>         | <b>10.7%</b>         | <b>3.27%</b>         |
|                                                             | 30                   | 1                    | 1                    | 1                    |
|                                                             | 40                   | 3.42 [2.89-4.04]     | 2.52 [1.94-3.28]     | 1.54 [1.31-1.8]      |
|                                                             | 50                   | 8.65 [7.12-10.5]     | 6.46 [4.75-8.8]      | 2.4 [1.99-2.9]       |
|                                                             | 60                   | 18.01 [14.63-22.16]  | 16.13 [11.54-22.55]  | 3.78 [3.09-4.63]     |
|                                                             | 70                   | 36.94 [29.93-45.59]  | 40.7 [28.9-57.33]    | 6.29 [5.11-7.74]     |
| <b>Sex</b>                                                  |                      | <b>0.05%</b>         | <b>0.09%</b>         | <b>0.21%</b>         |
|                                                             | M                    | 1                    | 1                    | 1                    |
|                                                             | F                    | 0.67 *** [0.67-0.67] | 0.65 *** [0.65-0.65] | 0.59 *** [0.59-0.59] |
| <b>Dysplastic moles</b>                                     |                      | <b>3.05%</b>         | <b>2.08%</b>         | <b>11.91%</b>        |
|                                                             | no                   | 1                    | 1                    | 1                    |
|                                                             | yes                  | 2.62 *** [2.59-2.65] | 2.24 *** [2.21-2.27] | 6.81 *** [6.8-6.82]  |
| <b>Family history of skin cancer</b>                        |                      | <b>1.33%</b>         | <b>1.14%</b>         | <b>0.08%</b>         |
|                                                             | Risk 0               | 1                    | 1                    | 1                    |
|                                                             | Risk 1               | 1.54 [1.51-1.56]     | 1.44 [1.42-1.47]     | 1.18 [1.14-1.21]     |
|                                                             | Risk 2               | 2.4 [2.27-2.53]      | 2.2 [2.08-2.33]      | 1.26 [1.15-1.38]     |
|                                                             | Risk 3               | 3.76 [3.21-4.4]      | 3.27 [2.78-3.84]     | 1.48 [1.17-1.88]     |
| <b>Skin color</b>                                           |                      | <b>0.8%</b>          | <b>0.79%</b>         | <b>0.61%</b>         |
|                                                             | extremely fair       | 1                    | 1                    | 1                    |
|                                                             | light                | 0.94 * [0.92-0.96]   | 0.9 ** [0.88-0.93]   | 0.98 [0.94-1.01]     |
|                                                             | medium               | 0.79 *** [0.78-0.8]  | 0.74 *** [0.73-0.75] | 0.8 ** [0.79-0.81]   |
|                                                             | olive                | 0.62 *** [0.59-0.64] | 0.65 *** [0.61-0.68] | 0.81 * [0.76-0.87]   |
| <b>Freckling tendency</b>                                   |                      | <b>0.77%</b>         | <b>0.7%</b>          | <b>0.51%</b>         |
|                                                             | none                 | 1                    | 1                    | 1                    |
|                                                             | few                  | 1.2 *** [1.19-1.22]  | 1.19 *** [1.18-1.21] | 1.18 *** [1.16-1.2]  |
|                                                             | lots                 | 1.57 *** [1.56-1.57] | 1.57 *** [1.57-1.57] | 1.48 *** [1.47-1.48] |
|                                                             | many                 | 2.06 *** [1.98-2.14] | 1.98 *** [1.89-2.07] | 1.67 *** [1.59-1.76] |
| <b>Sunbathing frequency before age of 30</b>                |                      | <b>0.9%</b>          | <b>0.79%</b>         | <b>0.3%</b>          |
|                                                             | never                | 1                    | 1                    | 1                    |
|                                                             | rarely               | 1.05 [1.01-1.09]     | 1.03 [0.98-1.08]     | 0.91 [0.86-0.96]     |
|                                                             | sometimes            | 1.41 *** [1.35-1.49] | 1.29 *** [1.21-1.37] | 1.03 [0.96-1.11]     |
|                                                             | frequently           | 1.81 *** [1.73-1.89] | 1.73 *** [1.63-1.84] | 1.27 ** [1.18-1.35]  |
|                                                             | very frequently      | 2.21 [2.14-2.28]     | 2.08 [1.99-2.17]     | 1.43 [1.37-1.5]      |
| <b>Actinic keratosis before age of 40</b>                   |                      | <b>0.52%</b>         | <b>0.7%</b>          | <b>0.03%</b>         |
|                                                             | no                   | 1                    | 1                    | 1                    |
|                                                             | yes                  | 3.66 *** [3.35-4.01] | 3.95 *** [3.62-4.31] | 1.41 *** [1.22-1.61] |
| <b>Blisters caused by sunburns</b>                          |                      | <b>0.26%</b>         | <b>0.23%</b>         | <b>0.07%</b>         |
|                                                             | 0                    | 1                    | 1                    | 1                    |
|                                                             | 1-2                  | 1.13 *** [1.12-1.13] | 1.22 *** [1.21-1.24] | 1 [0.99-1.02]        |
|                                                             | 3-4                  | 1.25 *** [1.25-1.26] | 1.37 *** [1.36-1.39] | 1.11 [1.1-1.12]      |
|                                                             | 5+                   | 1.42 *** [1.41-1.43] | 1.43 *** [1.41-1.44] | 1.21 *** [1.2-1.22]  |
| <b>Skin response to 3-4 hours of sun exposure</b>           |                      | <b>0.18%</b>         | <b>0.17%</b>         | <b>0.19%</b>         |
|                                                             | always burns         | 1                    | 1                    | 1                    |
|                                                             | usually burns        | 0.95 [0.93-0.97]     | 0.93 [0.91-0.95]     | 0.87 [0.85-0.9]      |
|                                                             | sometimes burns tans | 0.77 [0.75-0.79]     | 0.74 [0.72-0.77]     | 0.72 [0.69-0.75]     |
|                                                             | rarely burns         | 0.62 [0.62-0.63]     | 0.61 [0.6-0.61]      | 0.59 [0.59-0.59]     |
|                                                             | never burns          | 0.57 [0.49-0.66]     | 0.59 [0.49-0.71]     | 0.74 [0.58-0.95]     |
| <b>Typical sun exposure per week</b>                        |                      | <b>0.12%</b>         | <b>0.1%</b>          | <b>0.07%</b>         |
|                                                             | 0                    | 1                    | 1                    | 1                    |
|                                                             | 320                  | 1.19 [1.18-1.19]     | 1.2 [1.19-1.21]      | 1.14 [1.13-1.16]     |
|                                                             | 640                  | 1.35 [1.34-1.36]     | 1.35 [1.34-1.36]     | 1.27 [1.26-1.29]     |
|                                                             | 960                  | 1.49 [1.45-1.52]     | 1.43 [1.39-1.48]     | 1.39 [1.33-1.45]     |
|                                                             | 1280                 | 1.57 [1.48-1.67]     | 1.44 [1.32-1.56]     | 1.48 [1.34-1.63]     |
|                                                             | 1600                 | 1.6 [1.4-1.81]       | 1.36 [1.14-1.62]     | 1.54 [1.25-1.88]     |
|                                                             | 1920                 | 1.56 [1.25-1.96]     | 1.21 [0.88-1.65]     | 1.56 [1.09-2.24]     |
| <b>Hair color</b>                                           |                      | <b>0.08%</b>         | <b>0.02%</b>         | <b>0.25%</b>         |
|                                                             | light blond          | 1                    | 1                    | 1                    |
|                                                             | dark blond           | 0.93 [0.9-0.96]      | 0.94 [0.9-0.98]      | 0.8 [0.77-0.84]      |
|                                                             | red                  | 1.02 [1.02-1.02]     | 1.05 [1.05-1.05]     | 1.13 [1.13-1.13]     |
|                                                             | light brown          | 0.83 [0.8-0.87]      | 0.89 [0.85-0.94]     | 0.73 [0.69-0.77]     |
|                                                             | dark brown           | 0.8 [0.76-0.83]      | 0.87 [0.83-0.92]     | 0.67 [0.63-0.71]     |
|                                                             | black                | 0.72 *** [0.69-0.74] | 0.78 * [0.75-0.82]   | 0.7 ** [0.66-0.75]   |
| <b>Eye color</b>                                            |                      | <b>0.05%</b>         | <b>0.08%</b>         | <b>0.02%</b>         |
|                                                             | blue                 | 1                    | 1                    | 1                    |
|                                                             | blue gray            | 0.89 [0.87-0.9]      | 0.87 [0.85-0.89]     | 0.94 [0.91-0.96]     |
|                                                             | gray                 | 0.71 ** [0.59-0.86]  | 0.78 [0.61-0.99]     | 1 [0.75-1.33]        |
|                                                             | gray green           | 0.91 [0.89-0.93]     | 0.86 [0.84-0.88]     | 1.01 [0.98-1.04]     |
|                                                             | green                | 0.97 [0.96-0.98]     | 0.97 [0.96-0.98]     | 1 [0.98-1.01]        |
|                                                             | light brown          | 0.88 [0.84-0.91]     | 0.9 [0.85-0.94]      | 0.9 [0.85-0.97]      |
|                                                             | medium brown         | 0.87 [0.86-0.88]     | 0.83 [0.82-0.84]     | 0.92 [0.91-0.94]     |
|                                                             | dark brown black     | 0.85 [0.82-0.88]     | 0.8 [0.76-0.84]      | 0.85 [0.8-0.91]      |
| <b>Presence of large moles</b>                              |                      | <b>0.03%</b>         | <b>0.02%</b>         | <b>0.2%</b>          |
|                                                             | no                   | 1                    | 1                    | 1                    |
|                                                             | yes                  | 1.14 *** [1.13-1.14] | 1.09 ** [1.08-1.11]  | 1.33 *** [1.32-1.34] |
| <b>Moles in your right arm</b>                              |                      | <b>0.03%</b>         | <b>0.07%</b>         | <b>0.52%</b>         |
|                                                             | less than 3          | 1                    | 1                    | 1                    |
|                                                             | 3 to 6               | 0.91 [0.9-0.93]      | 0.89 [0.86-0.91]     | 1.14 [1.11-1.18]     |
|                                                             | 7 to 11              | 0.9 [0.87-0.94]      | 0.85 [0.81-0.89]     | 1.36 [1.3-1.43]      |
|                                                             | 12 to 18             | 0.84 [0.8-0.89]      | 0.76 [0.7-0.82]      | 1.51 [1.42-1.6]      |
|                                                             | 19 to 28             | 0.98 [0.91-1.05]     | 0.82 [0.74-0.91]     | 1.55 [1.42-1.68]     |
|                                                             | 29 to 39             | 0.84 [0.75-0.93]     | 0.75 [0.64-0.88]     | 1.64 [1.45-1.85]     |
|                                                             | more than 39         | 0.98 [0.89-1.09]     | 0.79 [0.67-0.92]     | 2.11 [1.9-2.33]      |
| <b>Sun hair lightening</b>                                  |                      | <b>0.02%</b>         | <b>0.03%</b>         | <b>0.02%</b>         |
|                                                             | very much            | 1                    | 1                    | 1                    |
|                                                             | somewhat             | 0.96 [0.92-1]        | 0.91 [0.86-0.96]     | 0.89 [0.83-0.94]     |
|                                                             | a little bit         | 0.98 [0.93-1.03]     | 0.95 [0.89-1.01]     | 0.96 [0.89-1.04]     |
|                                                             | unchanged            | 1.07 [1.02-1.12]     | 1.04 [0.98-1.11]     | 1.01 [0.94-1.08]     |
| <b>Skin response to sun exposure without sun protection</b> |                      | <b>0.02%</b>         | <b>0.02%</b>         | <b>0.01%</b>         |
|                                                             | painful blister      | 1                    | 1                    | 1                    |
|                                                             | blister              | 1.03 [1.03-1.04]     | 1 [1-1]              | 1.08 [1.08-1.09]     |
|                                                             | burns sometimes      | 1.11 [1.08-1.15]     | 1.1 [1.06-1.14]      | 1.06 [1.02-1.11]     |
|                                                             | rarely burns         | 1.03 [1.02-1.05]     | 1.02 [1.01-1.04]     | 1.05 [1.02-1.09]     |
|                                                             | never burns          | 0.82 [0.66-1.01]     | 0.77 [0.57-1.03]     | 1.09 [0.76-1.56]     |
| <b>Tanning bed</b>                                          |                      | <b>0.02%</b>         | <b>0.03%</b>         | <b>0.03%</b>         |
|                                                             | never                | 1                    | 1                    | 1                    |
|                                                             | 1-4times             | 1.03 [1.01-1.05]     | 1.03 [1.01-1.06]     | 1.04 [1.01-1.07]     |
|                                                             | 5-10times            | 1.1 * [1.06-1.14]    | 1.06 [1-1.11]        | 0.99 [0.93-1.06]     |
|                                                             | 11-20times           | 1.14 ** [1.09-1.2]   | 1.11 [1.04-1.19]     | 1.11 [1.02-1.2]      |
|                                                             | 21-30times           | 1.05 [0.98-1.13]     | 1.07 [0.97-1.18]     | 0.98 [0.87-1.11]     |
|                                                             | 30+times             | 1.08 [1.04-1.12]     | 1.24 *** [1.19-1.3]  | 1.23 ** [1.16-1.29]  |
| <b>Outdoor job</b>                                          |                      | <b>0.01%</b>         | <b>0.01%</b>         | <b>0.01%</b>         |
|                                                             | no                   | 1                    | 1                    | 1                    |
|                                                             | yes                  | 1.08 ** [1.07-1.09]  | 1.08 * [1.06-1.1]    | 1.09 * [1.07-1.12]   |
| <b>Total deviance explained:</b>                            |                      | <b>19.07%</b>        | <b>18.76%</b>        | <b>18.73%</b>        |
| Numbers of cases - controls:                                |                      | 14898/88110          | 7479/95529           | 3998/99010           |

**Supplementary Table 5: General linear model (GLM with binomial response) results for the best model (20-risk factor model) including factors from the cancer survey, without phenotype imputation.**

*See Supplementary Table 4 for a detailed description. Missing phenotype data were imputed using Hmisc library in R.*

| Variable                                             | Level                | BCC                  | SCC                  | Melanoma             |
|------------------------------------------------------|----------------------|----------------------|----------------------|----------------------|
| Age                                                  |                      | <b>9.92%</b>         | <b>10.48%</b>        | <b>2.9%</b>          |
|                                                      | 30                   | 1                    | 1                    | 1                    |
|                                                      | 40                   | 4.07 [3.25-5.1]      | 2.79 [2-3.89]        | 1.6 [1.29-1.98]      |
|                                                      | 50                   | 10.75 [8.31-13.91]   | 6.79 [4.63-9.96]     | 2.45 [1.91-3.14]     |
|                                                      | 60                   | 22.65 [17.25-29.73]  | 16.34 [10.82-24.69]  | 3.87 [2.97-5.03]     |
| Sex                                                  | 70                   | 48.1 [36.61-63.21]   | 43.09 [28.34-65.51]  | 6.7 [5.14-8.73]      |
|                                                      |                      | <b>0.06%</b>         | <b>0.05%</b>         | <b>0.12%</b>         |
| Dysplastic moles                                     | M                    | 1                    | 1                    | 1                    |
|                                                      | F                    | 0.63 *** [0.63-0.63] | 0.65 *** [0.65-0.65] | 0.59 *** [0.59-0.59] |
| Family history of skin cancer                        |                      | <b>2.8%</b>          | <b>1.97%</b>         | <b>13.1%</b>         |
|                                                      | no                   | 1                    | 1                    | 1                    |
| Skin color                                           | yes                  | 2.5 *** [2.46-2.53]  | 2.18 *** [2.15-2.22] | 7.67 *** [7.67-7.68] |
|                                                      |                      | <b>1.64%</b>         | <b>1.37%</b>         | <b>0.11%</b>         |
|                                                      | Risk 0               | 1                    | 1                    | 1                    |
|                                                      | Risk 1               | 1.61 [1.58-1.64]     | 1.5 [1.48-1.54]      | 1.23 [1.19-1.27]     |
| Freckling tendency                                   | Risk 2               | 2.54 [2.4-2.69]      | 2.24 [2.11-2.39]     | 1.29 [1.17-1.43]     |
|                                                      | Risk 3               | 3.92 [3.31-4.66]     | 3.46 [2.9-4.13]      | 1.48 [1.13-1.95]     |
|                                                      |                      | <b>0.86%</b>         | <b>0.9%</b>          | <b>0.7%</b>          |
|                                                      | extremely fair       | 1                    | 1                    | 1                    |
| Sunbathing frequency before age of 30                | light                | 0.96 [0.93-0.99]     | 0.91 * [0.88-0.94]   | 1 [0.96-1.05]        |
|                                                      | medium               | 0.81 *** [0.8-0.82]  | 0.73 *** [0.72-0.74] | 0.78 ** [0.76-0.79]  |
|                                                      | olive                | 0.6 *** [0.57-0.63]  | 0.59 *** [0.55-0.63] | 0.76 * [0.7-0.82]    |
|                                                      |                      | <b>0.85%</b>         | <b>0.89%</b>         | <b>0.68%</b>         |
| Actinic keratosis before age of 40                   | none                 | 1                    | 1                    | 1                    |
|                                                      | few                  | 1.22 *** [1.21-1.24] | 1.23 *** [1.21-1.25] | 1.25 *** [1.22-1.28] |
|                                                      | lots                 | 1.61 *** [1.61-1.61] | 1.73 *** [1.72-1.73] | 1.62 *** [1.61-1.64] |
|                                                      | many                 | 2.17 *** [2.07-2.27] | 2.15 *** [2.04-2.26] | 1.84 *** [1.74-1.95] |
|                                                      |                      | <b>0.93%</b>         | <b>0.9%</b>          | <b>0.4%</b>          |
| Blisters caused by sunburns                          | never                | 1                    | 1                    | 1                    |
|                                                      | rarely               | 0.98 [0.94-1.03]     | 0.94 [0.88-1]        | 0.79 * [0.74-0.85]   |
|                                                      | sometimes            | 1.33 *** [1.26-1.42] | 1.24 ** [1.15-1.34]  | 0.99 [0.9-1.08]      |
|                                                      | frequently           | 1.75 *** [1.65-1.85] | 1.69 *** [1.57-1.82] | 1.22 [1.12-1.33]     |
|                                                      | very frequently      | 2.09 [2-2.18]        | 2.02 [1.91-2.13]     | 1.33 [1.25-1.41]     |
| Skin response to 3-4 hours of sun exposure           |                      | <b>0.62%</b>         | <b>0.8%</b>          | <b>0.02%</b>         |
|                                                      | no                   | 1                    | 1                    | 1                    |
|                                                      | yes                  | 3.94 *** [3.55-4.37] | 4.03 *** [3.65-4.45] | 1.28 * [1.09-1.51]   |
|                                                      |                      | <b>0.22%</b>         | <b>0.22%</b>         | <b>0.08%</b>         |
|                                                      | 0                    | 1                    | 1                    | 1                    |
| Typical sun exposure per week                        | 1-2                  | 1.08 * [1.07-1.09]   | 1.18 ** [1.16-1.2]   | 0.94 [0.93-0.96]     |
|                                                      | 3-4                  | 1.19 *** [1.19-1.2]  | 1.34 *** [1.32-1.36] | 1.06 [1.05-1.07]     |
|                                                      | 5+                   | 1.33 *** [1.32-1.35] | 1.41 *** [1.39-1.43] | 1.16 * [1.14-1.18]   |
|                                                      |                      | <b>0.21%</b>         | <b>0.17%</b>         | <b>0.2%</b>          |
|                                                      | always burns         | 1                    | 1                    | 1                    |
| Hair color                                           | usually burns        | 0.98 [0.96-1.01]     | 0.89 [0.87-0.92]     | 0.87 [0.84-0.9]      |
|                                                      | sometimes burns tans | 0.78 [0.75-0.8]      | 0.72 [0.69-0.74]     | 0.68 [0.65-0.71]     |
|                                                      | rarely burns         | 0.6 [0.6-0.61]       | 0.59 [0.59-0.59]     | 0.57 [0.57-0.57]     |
|                                                      | never burns          | 0.62 [0.52-0.73]     | 0.62 [0.49-0.79]     | 0.74 [0.55-1]        |
|                                                      |                      | <b>0.16%</b>         | <b>0.14%</b>         | <b>0.15%</b>         |
| Eye color                                            | 0                    | 1                    | 1                    | 1                    |
|                                                      | 320                  | 1.21 [1.2-1.22]      | 1.23 [1.22-1.24]     | 1.22 [1.2-1.24]      |
|                                                      | 640                  | 1.42 [1.4-1.43]      | 1.42 [1.41-1.44]     | 1.43 [1.41-1.45]     |
|                                                      | 960                  | 1.59 [1.54-1.63]     | 1.55 [1.49-1.6]      | 1.6 [1.53-1.67]      |
|                                                      | 1280                 | 1.71 [1.6-1.83]      | 1.58 [1.45-1.73]     | 1.72 [1.55-1.91]     |
|                                                      | 1600                 | 1.77 [1.54-2.03]     | 1.52 [1.26-1.83]     | 1.77 [1.42-2.2]      |
|                                                      | 1920                 | 1.76 [1.38-2.24]     | 1.37 [0.98-1.92]     | 1.74 [1.17-2.6]      |
|                                                      |                      | <b>0.09%</b>         | <b>0.02%</b>         | <b>0.27%</b>         |
|                                                      | light blond          | 1                    | 1                    | 1                    |
|                                                      | dark blond           | 0.92 [0.89-0.96]     | 0.93 [0.89-0.98]     | 0.81 [0.76-0.85]     |
|                                                      | red                  | 1.06 [1.06-1.06]     | 1.07 [1.06-1.07]     | 1.21 [1.2-1.21]      |
| light brown                                          | 0.83 [0.79-0.88]     | 0.92 [0.86-0.98]     | 0.73 [0.68-0.79]     |                      |
| dark brown                                           | 0.79 [0.75-0.84]     | 0.9 [0.84-0.96]      | 0.68 [0.63-0.73]     |                      |
| black                                                | 0.71 *** [0.68-0.75] | 0.81 [0.76-0.86]     | 0.66 * [0.6-0.73]    |                      |
|                                                      | <b>0.04%</b>         | <b>0.08%</b>         | <b>0.02%</b>         |                      |
| Presence of large moles                              | blue                 | 1                    | 1                    | 1                    |
|                                                      | blue gray            | 0.88 [0.87-0.9]      | 0.84 [0.81-0.86]     | 0.94 [0.91-0.97]     |
|                                                      | gray                 | 0.79 [0.62-0.99]     | 0.84 [0.63-1.13]     | 1.02 [0.7-1.48]      |
|                                                      | gray green           | 0.93 [0.91-0.95]     | 0.86 [0.84-0.89]     | 1.02 [0.98-1.06]     |
|                                                      | green                | 0.99 [0.98-1]        | 0.97 [0.96-0.98]     | 1.02 [1-1.03]        |
|                                                      | light brown          | 0.87 [0.83-0.92]     | 0.93 [0.87-0.98]     | 0.96 [0.88-1.03]     |
|                                                      | medium brown         | 0.9 [0.89-0.91]      | 0.82 [0.81-0.83]     | 0.98 [0.96-1]        |
|                                                      | dark brown black     | 0.86 [0.83-0.9]      | 0.82 [0.78-0.87]     | 0.86 [0.79-0.93]     |
|                                                      |                      | <b>0.03%</b>         | <b>0.02%</b>         | <b>0.2%</b>          |
|                                                      | no                   | 1                    | 1                    | 1                    |
| Moles in your right arm                              | yes                  | 1.13 *** [1.12-1.14] | 1.1 ** [1.09-1.11]   | 1.34 *** [1.33-1.36] |
|                                                      |                      | <b>0.03%</b>         | <b>0.08%</b>         | <b>0.57%</b>         |
|                                                      | less than 3          | 1                    | 1                    | 1                    |
|                                                      | 3 to 6               | 0.93 [0.9-0.95]      | 0.89 [0.86-0.92]     | 1.1 [1.06-1.14]      |
|                                                      | 7 to 11              | 0.95 [0.91-1]        | 0.84 [0.79-0.9]      | 1.36 [1.28-1.44]     |
|                                                      | 12 to 18             | 0.84 [0.79-0.9]      | 0.72 [0.65-0.79]     | 1.53 [1.42-1.65]     |
|                                                      | 19 to 28             | 1.06 [0.97-1.15]     | 0.82 [0.72-0.93]     | 1.55 [1.4-1.72]      |
|                                                      | 29 to 39             | 0.9 [0.79-1.03]      | 0.78 [0.64-0.95]     | 1.6 [1.37-1.86]      |
|                                                      | more than 39         | 1.05 [0.93-1.19]     | 0.73 [0.6-0.89]      | 2.31 [2.06-2.6]      |
|                                                      |                      | <b>0.01%</b>         | <b>0.02%</b>         | <b>0.03%</b>         |
| Sun hair lightening                                  | very much            | 1                    | 1                    | 1                    |
|                                                      | somewhat             | 0.95 [0.91-1]        | 0.96 [0.9-1.02]      | 0.89 [0.82-0.95]     |
|                                                      | a little bit         | 0.96 [0.91-1.02]     | 1 [0.92-1.07]        | 0.95 [0.87-1.04]     |
|                                                      | unchanged            | 1.04 [0.98-1.1]      | 1.08 [1-1.16]        | 1.04 [0.96-1.13]     |
|                                                      | <b>0.01%</b>         | <b>0.03%</b>         | <b>0.01%</b>         |                      |
| Skin response to sun exposure without sun protection | painful blister      | 1                    | 1                    | 1                    |
|                                                      | blister              | 1.01 [1.01-1.01]     | 0.93 [0.93-0.93]     | 1.04 [1.04-1.05]     |
|                                                      | burns sometimes      | 1.06 [1.03-1.1]      | 1.04 [1-1.08]        | 1.02 [0.97-1.07]     |
|                                                      | rarely burns         | 0.99 [0.98-1.01]     | 0.96 [0.93-0.98]     | 1.13 [1.09-1.18]     |
|                                                      | never burns          | 0.77 [0.6-1]         | 0.6 [0.41-0.88]      | 1.31 [0.87-1.98]     |
|                                                      | <b>0.03%</b>         | <b>0.06%</b>         | <b>0.06%</b>         |                      |
| Tanning bed                                          | never                | 1                    | 1                    | 1                    |
|                                                      | 1-4times             | 1.06 [1.04-1.08]     | 1.03 [1-1.06]        | 1.07 [1.04-1.11]     |
|                                                      | 5-10times            | 1.13 ** [1.08-1.18]  | 1.13 [1.07-1.19]     | 0.98 [0.91-1.06]     |
|                                                      | 11-20times           | 1.16 ** [1.09-1.23]  | 1.09 [1.01-1.19]     | 1.16 [1.05-1.27]     |
|                                                      | 21-30times           | 1.14 * [1.05-1.24]   | 1.17 [1.05-1.3]      | 1.1 [0.96-1.26]      |
|                                                      | 30+times             | 1.16 ** [1.11-1.21]  | 1.32 *** [1.26-1.39] | 1.32 *** [1.24-1.4]  |
|                                                      | <b>0.01%</b>         | <b>0.02%</b>         | <b>0.04%</b>         |                      |
| Outdoor job                                          | no                   | 1                    | 1                    | 1                    |
|                                                      | yes                  | 1.09 ** [1.07-1.1]   | 1.1 * [1.08-1.13]    | 1.17 ** [1.14-1.2]   |
| <b>Total deviance explained:</b>                     |                      | <b>19.44%</b>        | <b>19.23%</b>        | <b>20.08%</b>        |
| Numbers of cases - controls:                         |                      | 10043/64660          | 4871/69832           | 2534/72169           |

**Supplementary Table 6: General linear model (GLM with binomial response) results for the best model (20-risk factor model) including factors from the cancer survey, after age matching.**

See Supplementary Table 4 for a detailed description. We used semi-parametric and non-parametric matching methods implemented in MatchIt library in R, with a ratio of one case for two controls.

| Variable                                             | Level                | BCC                  | SCC                  | Melanoma                |
|------------------------------------------------------|----------------------|----------------------|----------------------|-------------------------|
| Age                                                  | 30                   | 1                    | 1                    | 1                       |
|                                                      | 40                   | 1.48 [1.46-1.51]     | 0.78 [0.76-0.8]      | 0.98 [0.96-1]           |
|                                                      | 50                   | 1.53 [1.5-1.56]      | 0.84 [0.82-0.87]     | 1.09 [1.07-1.12]        |
|                                                      | 60                   | 1.59 [1.56-1.62]     | 1.05 [1.02-1.09]     | 1.37 [1.34-1.41]        |
|                                                      | 70                   | 2.05 [2.01-2.1]      | 1.35 [1.31-1.4]      | 1.87 [1.82-1.91]        |
|                                                      |                      | <b>0.35%</b>         | <b>0.01%</b>         | <b>0%</b>               |
| Sex                                                  | M                    | 1                    | 1                    | 1                       |
|                                                      | F                    | 0.6 *** [0.6-0.6]    | 0.53 *** [0.53-0.53] | 0.49 *** [0.49-0.49]    |
|                                                      |                      | <b>5.82%</b>         | <b>6.04%</b>         | <b>23.03%</b>           |
| Dysplastic moles                                     | no                   | 1                    | 1                    | 1                       |
|                                                      | yes                  | 3.88 *** [3.88-3.88] | 3.99 *** [3.99-3.99] | 12.36 *** [12.35-12.36] |
|                                                      |                      | <b>2.13%</b>         | <b>2.34%</b>         | <b>0.47%</b>            |
| Family history of skin cancer                        | Risk 0               | 1                    | 1                    | 1                       |
|                                                      | Risk 1               | 1.67 [1.67-1.67]     | 1.71 [1.71-1.72]     | 1.37 [1.37-1.38]        |
|                                                      | Risk 2               | 2.96 [2.95-2.97]     | 2.88 [2.87-2.89]     | 2.17 [2.15-2.19]        |
|                                                      | Risk 3               | 4.94 [4.86-5.02]     | 4.74 [4.66-4.83]     | 2.92 [2.75-3.1]         |
|                                                      |                      | <b>1.46%</b>         | <b>1.83%</b>         | <b>1.37%</b>            |
| Skin color                                           | extremely fair       | 1                    | 1                    | 1                       |
|                                                      | light                | 0.89 *** [0.89-0.89] | 0.89 * [0.89-0.89]   | 0.92 [0.92-0.93]        |
|                                                      | medium               | 0.71 *** [0.71-0.71] | 0.69 *** [0.69-0.69] | 0.71 *** [0.71-0.71]    |
|                                                      | olive                | 0.59 *** [0.59-0.59] | 0.63 *** [0.63-0.63] | 0.75 * [0.75-0.76]      |
|                                                      |                      | <b>1.43%</b>         | <b>1.81%</b>         | <b>1.51%</b>            |
| Freckling tendency                                   | none                 | 1                    | 1                    | 1                       |
|                                                      | few                  | 1.28 *** [1.28-1.28] | 1.33 *** [1.33-1.33] | 1.34 *** [1.34-1.34]    |
|                                                      | lots                 | 1.83 *** [1.83-1.83] | 1.94 *** [1.94-1.94] | 1.96 *** [1.96-1.96]    |
|                                                      | many                 | 2.57 *** [2.57-2.58] | 2.75 *** [2.75-2.76] | 2.64 *** [2.62-2.66]    |
|                                                      |                      | <b>1.5%</b>          | <b>1.68%</b>         | <b>0.77%</b>            |
| Sunbathing frequency before age of 30                | never                | 1                    | 1                    | 1                       |
|                                                      | rarely               | 1.1 [1.1-1.1]        | 1.04 [1.03-1.04]     | 0.95 [0.95-0.96]        |
|                                                      | sometimes            | 1.53 *** [1.52-1.53] | 1.4 *** [1.39-1.4]   | 1.19 [1.18-1.19]        |
|                                                      | frequently           | 2.14 *** [2.13-2.14] | 2.07 *** [2.07-2.07] | 1.47 *** [1.46-1.48]    |
|                                                      | very frequently      | 2.65 [2.65-2.66]     | 2.72 [2.71-2.72]     | 1.9 [1.89-1.9]          |
|                                                      |                      | <b>1.63%</b>         | <b>2.11%</b>         | <b>1.04%</b>            |
| Actinic keratosis before age of 40                   | no                   | 1                    | 1                    | 1                       |
|                                                      | yes                  | >100 [0->100]        | >100 [0->100]        | >100 [0->100]           |
|                                                      |                      | <b>0.46%</b>         | <b>0.55%</b>         | <b>0.27%</b>            |
| Blisters caused by sunburns                          | 0                    | 1                    | 1                    | 1                       |
|                                                      | 1-2                  | 1.18 *** [1.18-1.18] | 1.23 *** [1.23-1.23] | 1.03 [1.03-1.03]        |
|                                                      | 3-4                  | 1.3 *** [1.3-1.3]    | 1.41 *** [1.41-1.42] | 1.26 ** [1.26-1.26]     |
|                                                      | 5+                   | 1.55 *** [1.55-1.55] | 1.64 *** [1.64-1.64] | 1.44 *** [1.44-1.44]    |
|                                                      |                      |                      | <b>0.33%</b>         | <b>0.5%</b>             |
| Skin response to 3-4 hours of sun exposure           | always burns         | 1                    | 1                    | 1                       |
|                                                      | usually burns        | 0.92 [0.92-0.92]     | 0.93 [0.93-0.93]     | 0.91 [0.91-0.91]        |
|                                                      | sometimes burns tans | 0.73 [0.73-0.73]     | 0.66 [0.66-0.66]     | 0.7 [0.7-0.7]           |
|                                                      | rarely burns         | 0.56 [0.56-0.56]     | 0.48 [0.48-0.48]     | 0.57 [0.57-0.57]        |
|                                                      | never burns          | 0.49 [0.49-0.5]      | 0.47 [0.47-0.48]     | 0.71 [0.69-0.73]        |
|                                                      |                      | <b>0.18%</b>         | <b>0.21%</b>         | <b>0.26%</b>            |
| Typical sun exposure per week                        | 0                    | 1                    | 1                    | 1                       |
|                                                      | 320                  | 1.22 [1.22-1.22]     | 1.26 [1.26-1.27]     | 1.33 [1.33-1.33]        |
|                                                      | 640                  | 1.42 [1.42-1.42]     | 1.5 [1.5-1.5]        | 1.66 [1.66-1.66]        |
|                                                      | 960                  | 1.56 [1.56-1.56]     | 1.67 [1.66-1.67]     | 1.93 [1.93-1.94]        |
|                                                      | 1280                 | 1.63 [1.62-1.63]     | 1.73 [1.73-1.74]     | 2.11 [2.09-2.13]        |
|                                                      | 1600                 | 1.61 [1.6-1.63]      | 1.69 [1.67-1.71]     | 2.15 [2.09-2.21]        |
|                                                      | 1920                 | 1.52 [1.49-1.55]     | 1.55 [1.5-1.59]      | 2.06 [1.92-2.2]         |
|                                                      |                      |                      | <b>0.13%</b>         | <b>0.08%</b>            |
| Hair color                                           | light blond          | 1                    | 1                    | 1                       |
|                                                      | dark blond           | 0.93 [0.93-0.94]     | 0.93 [0.93-0.93]     | 0.84 [0.84-0.84]        |
|                                                      | red                  | 1.04 [1.04-1.04]     | 1.19 [1.19-1.19]     | 1.24 [1.24-1.24]        |
|                                                      | light brown          | 0.8 [0.8-0.81]       | 0.86 [0.86-0.87]     | 0.74 [0.73-0.74]        |
|                                                      | dark brown           | 0.76 [0.76-0.76]     | 0.84 [0.84-0.84]     | 0.64 [0.64-0.64]        |
|                                                      | black                | 0.73 *** [0.73-0.73] | 0.73 ** [0.73-0.73]  | 0.65 ** [0.64-0.65]     |
|                                                      |                      | <b>0.06%</b>         | <b>0.19%</b>         | <b>0.06%</b>            |
| Eye color                                            | blue                 | 1                    | 1                    | 1                       |
|                                                      | blue gray            | 0.89 [0.89-0.89]     | 0.83 [0.83-0.83]     | 0.95 [0.94-0.95]        |
|                                                      | gray                 | 0.67 ** [0.66-0.68]  | 0.69 [0.68-0.7]      | 0.82 [0.78-0.85]        |
|                                                      | gray green           | 0.92 [0.91-0.92]     | 0.79 [0.79-0.79]     | 1.06 [1.06-1.06]        |
|                                                      | green                | 0.98 [0.98-0.98]     | 0.91 [0.91-0.91]     | 0.99 [0.99-0.99]        |
|                                                      | light brown          | 0.88 [0.88-0.88]     | 0.76 [0.76-0.76]     | 0.81 [0.8-0.81]         |
|                                                      | medium brown         | 0.85 [0.85-0.86]     | 0.78 [0.78-0.78]     | 0.91 [0.91-0.91]        |
|                                                      | dark brown black     | 0.83 [0.83-0.83]     | 0.72 [0.72-0.72]     | 0.79 [0.79-0.8]         |
|                                                      |                      |                      | <b>0.05%</b>         | <b>0.05%</b>            |
| Presence of large moles                              | no                   | 1                    | 1                    | 1                       |
|                                                      | yes                  | 1.15 *** [1.15-1.15] | 1.14 *** [1.14-1.14] | 1.39 *** [1.39-1.39]    |
|                                                      |                      | <b>0.03%</b>         | <b>0.09%</b>         | <b>0.44%</b>            |
| Moles in your right arm                              | less than 3          | 1                    | 1                    | 1                       |
|                                                      | 3 to 6               | 0.91 [0.91-0.91]     | 0.86 [0.86-0.86]     | 1.2 [1.2-1.2]           |
|                                                      | 7 to 11              | 0.92 [0.92-0.92]     | 0.84 [0.84-0.85]     | 1.32 [1.32-1.33]        |
|                                                      | 12 to 18             | 0.94 [0.94-0.94]     | 0.79 [0.79-0.79]     | 1.38 [1.37-1.39]        |
|                                                      | 19 to 28             | 0.97 [0.96-0.97]     | 0.8 [0.79-0.8]       | 1.52 [1.51-1.53]        |
|                                                      | 29 to 39             | 0.93 [0.93-0.94]     | 0.65 [0.64-0.65]     | 1.57 [1.55-1.59]        |
|                                                      | more than 39         | 1.14 [1.14-1.15]     | 1.01 [1-1.02]        | 1.93 [1.91-1.95]        |
|                                                      |                      |                      | <b>0.05%</b>         | <b>0.06%</b>            |
| Sun hair lightening                                  | very much            | 1                    | 1                    | 1                       |
|                                                      | somewhat             | 0.92 [0.91-0.92]     | 0.92 [0.92-0.92]     | 0.82 [0.82-0.83]        |
|                                                      | a little bit         | 0.96 [0.96-0.96]     | 0.98 [0.98-0.98]     | 0.94 [0.93-0.94]        |
|                                                      | unchanged            | 1.08 [1.08-1.08]     | 1.1 [1.1-1.11]       | 1.07 [1.07-1.08]        |
|                                                      |                      | <b>0.05%</b>         | <b>0.05%</b>         | <b>0.03%</b>            |
| Skin response to sun exposure without sun protection | painful blister      | 1                    | 1                    | 1                       |
|                                                      | blister              | 1.05 [1.05-1.05]     | 1.06 [1.06-1.06]     | 1.11 [1.11-1.11]        |
|                                                      | burns sometimes      | 1.15 [1.15-1.15]     | 1.17 [1.17-1.18]     | 1.1 [1.1-1.1]           |
|                                                      | rarely burns         | 1.01 [1.01-1.01]     | 1.06 [1.06-1.06]     | 0.96 [0.96-0.96]        |
|                                                      | never burns          | 0.73 [0.72-0.75]     | 0.74 [0.73-0.76]     | 0.76 [0.72-0.8]         |
|                                                      |                      | <b>0.02%</b>         | <b>0.05%</b>         | <b>0.1%</b>             |
| Tanning bed                                          | never                | 1                    | 1                    | 1                       |
|                                                      | 1-4times             | 1.02 [1.02-1.03]     | 1.09 [1.08-1.09]     | 1.12 [1.12-1.12]        |
|                                                      | 5-10times            | 1.11 * [1.11-1.12]   | 1.14 [1.14-1.14]     | 1.07 [1.07-1.08]        |
|                                                      | 11-20times           | 1.15 * [1.14-1.15]   | 1.19 * [1.18-1.19]   | 1.28 * [1.27-1.29]      |
|                                                      | 21-30times           | 1 [1-1.01]           | 0.98 [0.98-0.99]     | 0.98 [0.97-0.99]        |
|                                                      | 30+times             | 1.11 * [1.11-1.11]   | 1.21 ** [1.2-1.21]   | 1.44 *** [1.44-1.45]    |
|                                                      |                      | <b>0.02%</b>         | <b>0.02%</b>         | <b>0.03%</b>            |
| Outdoor job                                          | no                   | 1                    | 1                    | 1                       |
|                                                      | yes                  | 1.1 *** [1.1-1.1]    | 1.08 * [1.08-1.09]   | 1.16 ** [1.16-1.16]     |
| <b>Total deviance explained:</b>                     |                      | <b>15.93%</b>        | <b>17.99%</b>        | <b>30.88%</b>           |
| Numbers of cases - controls:                         |                      | 14672/29288          | 7307/14513           | 3933/11739              |

Supplementary Table 7: General linear model (GLM with binomial response) results for the best model (20-risk factor model) including factors from the cancer survey, and the polygenic risk score (PRS).

See Supplementary Table 4 for a detailed description.

| Variable                                             | Level                | BCC                  | SCC                  | Melanoma             |
|------------------------------------------------------|----------------------|----------------------|----------------------|----------------------|
| Age                                                  |                      | 9.88%                | 10.69%               | 3.27%                |
|                                                      | 30                   | 1                    | 1                    | 1                    |
|                                                      | 40                   | 3.38 [2.86-4]        | 2.49 [1.91-3.24]     | 1.51 [1.29-1.77]     |
|                                                      | 50                   | 8.57 [7.06-10.41]    | 6.36 [4.67-8.65]     | 2.35 [1.95-2.83]     |
|                                                      | 60                   | 17.96 [14.6-22.1]    | 15.83 [11.33-22.11]  | 3.71 [3.03-4.54]     |
| Sex                                                  | 70                   | 37.15 [30.11-45.84]  | 39.84 [28.31-56.08]  | 6.18 [5.02-7.6]      |
|                                                      |                      | 0.05%                | 0.09%                | 0.2%                 |
| Polygenic risk score (PRS)                           | M                    | 1                    | 1                    | 1                    |
|                                                      | F                    | 0.68 *** [0.68-0.68] | 0.66 *** [0.66-0.66] | 0.6 *** [0.6-0.6]    |
| Dysplastic moles                                     |                      | 3.16%                | 1.6%                 | 1.99%                |
|                                                      | -1.71                | 1                    | 1                    | 1                    |
|                                                      | -0.57                | 3.89 [3.66-4.14]     | 2.23 [2.06-2.41]     | 3.03 [2.72-3.37]     |
|                                                      | 0.57                 | 15.16 [14.26-16.11]  | 4.96 [4.53-5.42]     | 9.16 [7.9-10.62]     |
| Family history of skin cancer                        | 1.71                 | 59.01 [58.98-59.04]  | 11.04 [10.86-11.22]  | 27.72 [26.15-29.39]  |
|                                                      |                      | 2.94%                | 2.06%                | 11.53%               |
| Skin color                                           | no                   | 1                    | 1                    | 1                    |
|                                                      | yes                  | 2.63 *** [2.6-2.66]  | 2.25 *** [2.22-2.27] | 6.75 *** [6.74-6.76] |
|                                                      |                      | 1.08%                | 0.97%                | 0.06%                |
|                                                      | Risk 0               | 1                    | 1                    | 1                    |
| Freckling tendency                                   | Risk 1               | 1.5 [1.48-1.53]      | 1.42 [1.4-1.45]      | 1.16 [1.13-1.19]     |
|                                                      | Risk 2               | 2.29 [2.17-2.42]     | 2.16 [2.03-2.29]     | 1.24 [1.14-1.36]     |
|                                                      | Risk 3               | 3.58 [3.05-4.21]     | 3.18 [2.71-3.74]     | 1.45 [1.15-1.84]     |
| Sunbathing frequency before age of 30                |                      | 0.31%                | 0.38%                | 0.31%                |
|                                                      | extremely fair       | 1                    | 1                    | 1                    |
|                                                      | light                | 0.97 [0.95-0.99]     | 0.93 [0.91-0.96]     | 0.99 [0.95-1.03]     |
| Actinic keratosis before age of 40                   | medium               | 0.86 *** [0.85-0.87] | 0.8 *** [0.79-0.81]  | 0.84 ** [0.82-0.85]  |
|                                                      | olive                | 0.72 *** [0.69-0.75] | 0.74 *** [0.7-0.78]  | 0.91 [0.86-0.97]     |
|                                                      |                      | 0.39%                | 0.38%                | 0.37%                |
| Blister caused by sunburns                           | none                 | 1                    | 1                    | 1                    |
|                                                      | few                  | 1.13 *** [1.12-1.14] | 1.13 *** [1.12-1.15] | 1.16 ** [1.14-1.18]  |
|                                                      | lots                 | 1.36 *** [1.35-1.36] | 1.39 *** [1.39-1.39] | 1.42 *** [1.41-1.42] |
|                                                      | many                 | 1.66 *** [1.59-1.72] | 1.65 *** [1.58-1.73] | 1.58 *** [1.5-1.66]  |
|                                                      |                      | 1%                   | 0.87%                | 0.32%                |
| Skin response to 3-4 hours of sun exposure           | never                | 1                    | 1                    | 1                    |
|                                                      | rarely               | 1.07 [1.03-1.11]     | 1.05 [1-1.1]         | 0.92 [0.87-0.98]     |
|                                                      | sometimes            | 1.46 *** [1.39-1.54] | 1.32 *** [1.24-1.41] | 1.05 [0.98-1.13]     |
|                                                      | frequently           | 1.88 *** [1.8-1.97]  | 1.79 *** [1.69-1.9]  | 1.3 ** [1.21-1.39]   |
|                                                      | very frequently      | 2.35 [2.27-2.43]     | 2.17 [2.08-2.27]     | 1.48 [1.41-1.55]     |
| Typical sun exposure per week                        |                      | 0.45%                | 0.64%                | 0.03%                |
|                                                      | no                   | 1                    | 1                    | 1                    |
|                                                      | yes                  | 3.45 *** [3.15-3.78] | 3.75 *** [3.43-4.1]  | 1.38 ** [1.2-1.59]   |
|                                                      |                      | 0.19%                | 0.18%                | 0.06%                |
|                                                      | 0                    | 1                    | 1                    | 1                    |
| Presence of large moles                              | 1-2                  | 1.11 *** [1.1-1.12]  | 1.21 *** [1.2-1.23]  | 1 [0.98-1.01]        |
|                                                      | 3-4                  | 1.23 *** [1.22-1.23] | 1.35 *** [1.34-1.36] | 1.1 [1.09-1.1]       |
|                                                      | 5+                   | 1.38 *** [1.37-1.38] | 1.39 *** [1.38-1.41] | 1.19 ** [1.18-1.21]  |
|                                                      |                      | 0.1%                 | 0.11%                | 0.14%                |
|                                                      | always burns         | 1                    | 1                    | 1                    |
| Moles in your right arm                              | usually burns        | 0.98 [0.96-1]        | 0.95 [0.93-0.98]     | 0.88 [0.86-0.9]      |
|                                                      | sometimes burns tans | 0.84 [0.81-0.86]     | 0.79 [0.77-0.82]     | 0.74 [0.72-0.78]     |
|                                                      | rarely burns         | 0.7 [0.69-0.71]      | 0.66 [0.66-0.67]     | 0.63 [0.63-0.63]     |
|                                                      | never burns          | 0.66 [0.57-0.76]     | 0.65 [0.54-0.79]     | 0.79 [0.62-1.01]     |
|                                                      |                      | 0.11%                | 0.1%                 | 0.07%                |
| Hair color                                           | 0                    | 1                    | 1                    | 1                    |
|                                                      | 320                  | 1.17 [1.17-1.18]     | 1.19 [1.18-1.2]      | 1.14 [1.13-1.15]     |
|                                                      | 640                  | 1.33 [1.32-1.34]     | 1.34 [1.33-1.35]     | 1.28 [1.26-1.29]     |
|                                                      | 960                  | 1.46 [1.43-1.5]      | 1.42 [1.38-1.47]     | 1.4 [1.35-1.46]      |
|                                                      | 1280                 | 1.55 [1.46-1.65]     | 1.43 [1.32-1.55]     | 1.51 [1.37-1.66]     |
|                                                      | 1600                 | 1.59 [1.39-1.81]     | 1.36 [1.14-1.62]     | 1.59 [1.3-1.95]      |
|                                                      | 1920                 | 1.57 [1.25-1.97]     | 1.21 [0.89-1.66]     | 1.64 [1.15-2.36]     |
|                                                      |                      | 0.1%                 | 0.05%                | 0.12%                |
|                                                      | light blond          | 1                    | 1                    | 1                    |
|                                                      | dark blond           | 0.91 [0.88-0.94]     | 0.92 [0.89-0.96]     | 0.81 [0.77-0.84]     |
| Eye color                                            | red                  | 0.92 [0.92-0.92]     | 0.95 [0.95-0.95]     | 0.98 [0.98-0.99]     |
|                                                      | light brown          | 0.79 [0.76-0.82]     | 0.85 [0.8-0.89]      | 0.75 [0.7-0.79]      |
|                                                      | dark brown           | 0.73 [0.7-0.76]      | 0.79 [0.75-0.84]     | 0.71 [0.67-0.75]     |
|                                                      | black                | 0.63 *** [0.61-0.65] | 0.68 *** [0.65-0.71] | 0.8 [0.74-0.85]      |
|                                                      |                      | 0.02%                | 0.07%                | 0.01%                |
|                                                      | blue                 | 1                    | 1                    | 1                    |
|                                                      | blue gray            | 0.92 [0.91-0.93]     | 0.89 [0.87-0.91]     | 0.94 [0.91-0.96]     |
|                                                      | gray                 | 0.75 * [0.62-0.91]   | 0.81 [0.64-1.03]     | 1.03 [0.77-1.36]     |
|                                                      | gray green           | 0.98 [0.96-1]        | 0.88 [0.86-0.91]     | 1.02 [0.99-1.06]     |
|                                                      | green                | 1.05 [1.05-1.06]     | 1.01 [1-1.02]        | 1.01 [1-1.03]        |
| Sun hair lightening                                  | light brown          | 1 [0.96-1.04]        | 0.93 [0.88-0.97]     | 0.94 [0.88-1]        |
|                                                      | medium brown         | 1 [0.99-1.01]        | 0.87 [0.86-0.88]     | 0.96 [0.94-0.97]     |
|                                                      | dark brown black     | 1.01 [0.97-1.04]     | 0.85 [0.81-0.89]     | 0.9 [0.84-0.96]      |
|                                                      |                      | 0.05%                | 0.03%                | 0.2%                 |
|                                                      | no                   | 1                    | 1                    | 1                    |
| Sun hair lightening                                  | yes                  | 1.17 *** [1.16-1.18] | 1.12 *** [1.11-1.13] | 1.33 *** [1.32-1.34] |
|                                                      |                      | 0.02%                | 0.05%                | 0.53%                |
|                                                      | less than 3          | 1                    | 1                    | 1                    |
|                                                      | 3 to 6               | 0.93 [0.91-0.95]     | 0.9 [0.87-0.92]      | 1.14 [1.11-1.17]     |
|                                                      | 7 to 11              | 0.93 [0.9-0.97]      | 0.87 [0.83-0.92]     | 1.37 [1.3-1.43]      |
|                                                      | 12 to 18             | 0.89 [0.84-0.94]     | 0.79 [0.73-0.85]     | 1.53 [1.44-1.63]     |
|                                                      | 19 to 28             | 1.02 [0.95-1.09]     | 0.85 [0.76-0.94]     | 1.56 [1.44-1.7]      |
|                                                      | 29 to 39             | 0.88 [0.79-0.99]     | 0.79 [0.67-0.92]     | 1.64 [1.45-1.84]     |
|                                                      | more than 39         | 1.04 [0.94-1.15]     | 0.83 [0.71-0.97]     | 2.12 [1.91-2.35]     |
| Skin response to sun exposure without sun protection |                      | 0.01%                | 0.02%                | 0.02%                |
|                                                      | very much            | 1                    | 1                    | 1                    |
|                                                      | somewhat             | 0.95 [0.91-0.99]     | 0.9 [0.86-0.95]      | 0.89 [0.84-0.95]     |
|                                                      | a little bit         | 0.96 [0.92-1.01]     | 0.94 [0.88-1]        | 0.97 [0.9-1.04]      |
| Tanning bed                                          | unchanged            | 1.03 [0.98-1.08]     | 1.01 [0.95-1.07]     | 1.01 [0.95-1.09]     |
|                                                      |                      | 0.03%                | 0.02%                | 0.01%                |
|                                                      | painful blister      | 1                    | 1                    | 1                    |
|                                                      | blister              | 1.04 [1.03-1.04]     | 1 [0.99-1]           | 1.08 [1.08-1.09]     |
|                                                      | burns sometimes      | 1.13 [1.1-1.16]      | 1.1 [1.07-1.14]      | 1.07 [1.02-1.11]     |
| Outdoor job                                          | rarely burns         | 1.05 [1.04-1.07]     | 1.03 [1.01-1.05]     | 1.07 [1.03-1.1]      |
|                                                      | never burns          | 0.83 [0.67-1.03]     | 0.79 [0.59-1.05]     | 1.11 [0.77-1.59]     |
|                                                      |                      | 0.01%                | 0.03%                | 0.03%                |
|                                                      | never                | 1                    | 1                    | 1                    |
|                                                      | 1-4times             | 1.03 [1.01-1.05]     | 1.03 [1.01-1.05]     | 1.05 [1.02-1.08]     |
|                                                      | 5-10times            | 1.1 * [1.06-1.14]    | 1.05 [1-1.11]        | 0.99 [0.93-1.06]     |
| Sun hair lightening                                  | 11-20times           | 1.13 ** [1.08-1.19]  | 1.1 [1.03-1.18]      | 1.1 [1.01-1.19]      |
|                                                      | 21-30times           | 1.03 [0.96-1.11]     | 1.06 [0.96-1.16]     | 0.98 [0.87-1.1]      |
|                                                      | 30+times             | 1.06 [1.02-1.1]      | 1.22 *** [1.17-1.28] | 1.21 ** [1.14-1.27]  |
|                                                      |                      | 0.01%                | 0.01%                | 0.01%                |
| Total deviance explained:                            | no                   | 1                    | 1                    | 1                    |
|                                                      | yes                  | 1.08 ** [1.06-1.09]  | 1.07 * [1.05-1.09]   | 1.09 * [1.07-1.11]   |
|                                                      |                      | 20.85%               | 19.33%               | 19.72%               |
| Numbers of cases - controls:                         |                      | 14893/88090          | 7476/95507           | 3997/98986           |



Supplementary Table 8: General linear model (GLM with binomial response) results for the best model (31-risk factor model) including factors from the cancer survey, and the additional phenotypes from 23andMe database. See Supplementary Table 4 for a detailed description.

| Variable                                             | Level                    | BCC                  | SCC                  | Melanoma             |
|------------------------------------------------------|--------------------------|----------------------|----------------------|----------------------|
| Age                                                  |                          | <b>9.87%</b>         | <b>10.7%</b>         | <b>3.27%</b>         |
|                                                      | 30                       |                      |                      |                      |
|                                                      | 40                       | 3.57 [3.02-4.21]     | 2.59 [1.99-3.36]     | 1.56 [1.33-1.82]     |
|                                                      | 50                       | 9.33 [7.69-11.31]    | 6.79 [5-9.22]        | 2.45 [2.03-2.95]     |
|                                                      | 60                       | 20.07 [16.34-24.67]  | 17.31 [12.41-24.15]  | 3.91 [3.2-4.79]      |
|                                                      | 70                       | 42.49 [34.48-52.35]  | 44.57 [31.73-62.63]  | 6.64 [5.4-8.17]      |
| Sex                                                  |                          | <b>0.05%</b>         | <b>0.09%</b>         | <b>0.21%</b>         |
|                                                      | M                        |                      |                      |                      |
|                                                      | F                        | 0.77 *** [0.76-0.77] | 0.71 *** [0.71-0.71] | 0.65 *** [0.65-0.66] |
| Dysplastic moles                                     |                          | <b>3.05%</b>         | <b>2.08%</b>         | <b>11.91%</b>        |
|                                                      | no                       |                      |                      |                      |
|                                                      | yes                      | 2.57 *** [2.54-2.6]  | 2.19 *** [2.16-2.22] | 6.76 *** [6.74-6.77] |
| Family history of skin cancer                        |                          | <b>1.33%</b>         | <b>1.14%</b>         | <b>0.22%</b>         |
|                                                      | Risk 0                   |                      |                      |                      |
|                                                      | Risk 1                   | 1.54 [1.52-1.57]     | 1.45 [1.42-1.48]     | 1.18 [1.15-1.22]     |
|                                                      | Risk 2                   | 2.38 [2.26-2.51]     | 2.18 [2.06-2.31]     | 1.26 [1.15-1.38]     |
|                                                      | Risk 3                   | 3.69 [3.16-4.32]     | 3.23 [2.75-3.79]     | 1.48 [1.17-1.87]     |
| Skin color                                           |                          | <b>0.8%</b>          | <b>0.79%</b>         | <b>0.56%</b>         |
|                                                      | extremely fair           |                      |                      |                      |
|                                                      | light                    | 0.92 ** [0.9-0.94]   | 0.89 ** [0.86-0.91]  | 0.96 [0.93-1]        |
|                                                      | medium                   | 0.77 *** [0.76-0.78] | 0.72 *** [0.71-0.73] | 0.78 *** [0.77-0.8]  |
|                                                      | olive                    | 0.59 *** [0.57-0.61] | 0.62 *** [0.58-0.65] | 0.79 * [0.74-0.84]   |
| Freckling tendency                                   |                          | <b>0.77%</b>         | <b>0.7%</b>          | <b>0.51%</b>         |
|                                                      | none                     |                      |                      |                      |
|                                                      | few                      | 1.19 *** [1.17-1.2]  | 1.17 *** [1.16-1.19] | 1.17 *** [1.15-1.19] |
|                                                      | lots                     | 1.54 *** [1.53-1.54] | 1.55 *** [1.55-1.55] | 1.46 *** [1.46-1.46] |
|                                                      | many                     | 2.05 *** [1.97-2.13] | 1.97 *** [1.88-2.06] | 1.66 *** [1.57-1.74] |
| Sunbathing frequency before age of 30                |                          | <b>0.9%</b>          | <b>0.79%</b>         | <b>0.3%</b>          |
|                                                      | never                    |                      |                      |                      |
|                                                      | rarely                   | 1.03 [0.99-1.07]     | 1.02 [0.97-1.07]     | 0.91 [0.86-0.96]     |
|                                                      | sometimes                | 1.34 *** [1.28-1.41] | 1.24 *** [1.16-1.31] | 1.02 [0.94-1.09]     |
|                                                      | frequently               | 1.67 *** [1.6-1.75]  | 1.61 *** [1.52-1.71] | 1.23 * [1.15-1.32]   |
|                                                      | very frequently          | 2.04 [1.97-2.1]      | 1.92 [1.84-2]        | 1.39 [1.33-1.45]     |
| Actinic keratosis before age of 40                   |                          | <b>0.52%</b>         | <b>0.7%</b>          | <b>0.04%</b>         |
|                                                      | no                       |                      |                      |                      |
|                                                      | yes                      | 3.38 *** [3.09-3.7]  | 3.64 *** [3.34-3.97] | 1.38 ** [1.21-1.59]  |
| Adulthood latitude                                   |                          | <b>0.29%</b>         | <b>0.33%</b>         | <b>0.03%</b>         |
|                                                      | 25                       |                      |                      |                      |
|                                                      | 35                       | 0.77 [0.74-0.8]      | 0.76 [0.73-0.8]      | 0.95 [0.9-1.01]      |
|                                                      | 45                       | 0.6 [0.58-0.61]      | 0.59 [0.57-0.61]     | 0.91 [0.86-0.95]     |
| BMI                                                  |                          | <b>0.33%</b>         | <b>0.19%</b>         | <b>0.01%</b>         |
|                                                      | 20                       |                      |                      |                      |
|                                                      | 25                       | 0.47 [0.42-0.53]     | 0.52 [0.45-0.61]     | 0.76 [0.62-0.92]     |
|                                                      | 30                       | 0.35 [0.31-0.39]     | 0.41 [0.35-0.47]     | 0.67 [0.55-0.8]      |
|                                                      | 35                       | 0.26 [0.24-0.28]     | 0.33 [0.3-0.36]      | 0.59 [0.51-0.67]     |
| Blisters caused by sunburns                          |                          | <b>0.28%</b>         | <b>0.23%</b>         | <b>0.13%</b>         |
|                                                      | 0                        |                      |                      |                      |
|                                                      | 1-2                      | 1.13 *** [1.13-1.14] | 1.23 *** [1.21-1.24] | 1.01 [1-1.02]        |
|                                                      | 3-4                      | 1.26 *** [1.26-1.27] | 1.37 *** [1.36-1.39] | 1.12 [1.11-1.13]     |
|                                                      | 5+                       | 1.44 *** [1.43-1.45] | 1.44 *** [1.42-1.45] | 1.22 *** [1.21-1.24] |
| Skin response to 3-4 hours of sun exposure           |                          | <b>0.19%</b>         | <b>0.18%</b>         | <b>0.16%</b>         |
|                                                      | always burns             |                      |                      |                      |
|                                                      | usually burns            | 0.93 [0.91-0.94]     | 0.91 [0.89-0.94]     | 0.87 [0.85-0.9]      |
|                                                      | sometimes burns tans     | 0.74 [0.72-0.76]     | 0.72 [0.7-0.75]      | 0.72 [0.69-0.75]     |
|                                                      | rarely burns             | 0.59 [0.59-0.59]     | 0.58 [0.58-0.59]     | 0.59 [0.59-0.59]     |
|                                                      | never burns              | 0.54 [0.47-0.63]     | 0.57 [0.47-0.69]     | 0.74 [0.58-0.94]     |
| Physical activity                                    |                          | <b>0.06%</b>         | <b>0.02%</b>         | <b>0%</b>            |
|                                                      | no                       |                      |                      |                      |
|                                                      | highly active            | 1.12 *** [1.11-1.13] | 1.06 * [1.05-1.07]   | 1.01 [1-1.02]        |
| Typical sun exposure per week                        |                          | <b>0.11%</b>         | <b>0.1%</b>          | <b>0.07%</b>         |
|                                                      | 0                        |                      |                      |                      |
|                                                      | 320                      | 1.16 [1.16-1.17]     | 1.18 [1.17-1.2]      | 1.14 [1.12-1.15]     |
|                                                      | 640                      | 1.31 [1.31-1.32]     | 1.33 [1.32-1.34]     | 1.26 [1.25-1.28]     |
|                                                      | 960                      | 1.44 [1.41-1.48]     | 1.41 [1.37-1.46]     | 1.37 [1.32-1.43]     |
|                                                      | 1280                     | 1.53 [1.44-1.63]     | 1.42 [1.31-1.54]     | 1.46 [1.33-1.61]     |
|                                                      | 1600                     | 1.58 [1.4-1.79]      | 1.35 [1.14-1.61]     | 1.52 [1.25-1.86]     |
|                                                      | 1920                     | 1.58 [1.27-1.98]     | 1.22 [0.9-1.66]      | 1.56 [1.09-2.22]     |
| Alcohol consumption                                  |                          | <b>0.04%</b>         | <b>0.03%</b>         | <b>0.01%</b>         |
|                                                      | no or (low) consumption  |                      |                      |                      |
|                                                      | intermediate consumption | 1.15 *** [1.15-1.16] | 1.12 *** [1.12-1.13] | 1.05 [1.04-1.06]     |
|                                                      | abuser                   | 1.11 *** [1.11-1.11] | 1.11 *** [1.11-1.11] | 1 [0.99-1]           |
| Weight                                               |                          | <b>0.07%</b>         | <b>0.03%</b>         | <b>0.03%</b>         |
|                                                      | 100                      |                      |                      |                      |
|                                                      | 201                      | 1.84 [1.68-2.02]     | 1.56 [1.38-1.76]     | 1.51 [1.29-1.76]     |
|                                                      | 299                      | 2.99 [2.93-3.05]     | 2.22 [2.16-2.28]     | 2.08 [2.01-2.16]     |
| Hair color                                           |                          | <b>0.07%</b>         | <b>0.03%</b>         | <b>0.16%</b>         |
|                                                      | light blond              |                      |                      |                      |
|                                                      | dark blond               | 0.93 [0.9-0.96]      | 0.94 [0.9-0.97]      | 0.8 [0.77-0.84]      |
|                                                      | red                      | 1.02 [1.02-1.03]     | 1.05 [1.05-1.05]     | 1.14 [1.14-1.14]     |
|                                                      | light brown              | 0.84 [0.81-0.88]     | 0.91 [0.86-0.95]     | 0.74 [0.69-0.78]     |
|                                                      | dark brown               | 0.82 [0.79-0.86]     | 0.9 [0.85-0.95]      | 0.68 [0.64-0.72]     |
|                                                      | black                    | 0.74 *** [0.72-0.77] | 0.81 * [0.77-0.84]   | 0.71 ** [0.66-0.76]  |
| Eye color                                            |                          | <b>0.04%</b>         | <b>0.07%</b>         | <b>0.02%</b>         |
|                                                      | blue                     |                      |                      |                      |
|                                                      | blue gray                | 0.89 [0.88-0.9]      | 0.87 [0.85-0.89]     | 0.94 [0.92-0.96]     |
|                                                      | gray                     | 0.72 * [0.6-0.87]    | 0.78 [0.62-0.99]     | 1.01 [0.76-1.34]     |
|                                                      | gray green               | 0.91 [0.9-0.93]      | 0.86 [0.84-0.88]     | 1.01 [0.98-1.04]     |
|                                                      | green                    | 0.96 [0.95-0.97]     | 0.95 [0.94-0.96]     | 1 [0.98-1.01]        |
|                                                      | light brown              | 0.87 [0.84-0.91]     | 0.89 [0.85-0.93]     | 0.91 [0.85-0.97]     |
|                                                      | medium brown             | 0.87 [0.86-0.88]     | 0.83 [0.82-0.84]     | 0.93 [0.91-0.94]     |
|                                                      | dark brown black         | 0.86 [0.83-0.89]     | 0.8 [0.77-0.84]      | 0.86 [0.81-0.92]     |
| Presence of large moles                              |                          | <b>0.04%</b>         | <b>0.01%</b>         | <b>0.3%</b>          |
|                                                      | no                       |                      |                      |                      |
|                                                      | yes                      | 1.15 *** [1.14-1.16] | 1.1 *** [1.09-1.11]  | 1.33 *** [1.32-1.34] |
| Moles in your right arm                              |                          | <b>0.03%</b>         | <b>0.07%</b>         | <b>0.36%</b>         |
|                                                      | less than 3              |                      |                      |                      |
|                                                      | 3 to 6                   | 0.92 [0.9-0.94]      | 0.89 [0.87-0.92]     | 1.15 [1.12-1.18]     |
|                                                      | 7 to 11                  | 0.91 [0.88-0.95]     | 0.86 [0.82-0.91]     | 1.38 [1.32-1.45]     |
|                                                      | 12 to 18                 | 0.85 [0.8-0.89]      | 0.77 [0.71-0.83]     | 1.52 [1.44-1.62]     |
|                                                      | 19 to 28                 | 0.99 [0.92-1.06]     | 0.83 [0.75-0.92]     | 1.57 [1.45-1.71]     |
|                                                      | 29 to 39                 | 0.85 [0.76-0.95]     | 0.77 [0.66-0.9]      | 1.67 [1.48-1.88]     |
|                                                      | more than 39             | 1 [0.9-1.1]          | 0.8 [0.69-0.93]      | 2.15 [1.94-2.38]     |
| Childhood latitude                                   |                          | <b>0.02%</b>         | <b>0.03%</b>         | <b>0.02%</b>         |
|                                                      | 25                       |                      |                      |                      |
|                                                      | 35                       | 0.9 [0.86-0.93]      | 0.87 [0.83-0.91]     | 0.89 [0.83-0.95]     |
|                                                      | 45                       | 0.81 [0.78-0.84]     | 0.76 [0.73-0.79]     | 0.79 [0.75-0.84]     |
| Sun hair lightening                                  |                          | <b>0.02%</b>         | <b>0.02%</b>         | <b>0.02%</b>         |
|                                                      | very much                |                      |                      |                      |
|                                                      | somewhat                 | 0.96 [0.92-1]        | 0.91 [0.87-0.96]     | 0.88 [0.83-0.94]     |
|                                                      | a little bit             | 0.97 [0.93-1.02]     | 0.95 [0.89-1.01]     | 0.96 [0.89-1.03]     |
|                                                      | unchanged                | 1.06 [1.01-1.11]     | 1.04 [0.98-1.1]      | 1 [0.94-1.07]        |
| Skin response to sun exposure without sun protection |                          | <b>0.02%</b>         | <b>0.02%</b>         | <b>0.01%</b>         |
|                                                      | painful blister          |                      |                      |                      |
|                                                      | blister                  | 1.02 [1.01-1.02]     | 0.99 [0.99-0.99]     | 1.08 [1.07-1.08]     |
|                                                      | burns sometimes          | 1.1 [1.07-1.13]      | 1.1 [1.06-1.14]      | 1.05 [1.01-1.1]      |
|                                                      | rarely burns             | 1.03 [1.02-1.05]     | 1.04 [1.02-1.05]     | 1.05 [1.02-1.08]     |
|                                                      | never burns              | 0.83 [0.67-1.03]     | 0.78 [0.59-1.05]     | 1.09 [0.76-1.55]     |
| Tanning bed                                          |                          | <b>0.02%</b>         | <b>0.04%</b>         | <b>0.04%</b>         |
|                                                      | never                    |                      |                      |                      |
|                                                      | 1-4times                 | 1.04 [1.02-1.06]     | 1.04 [1.02-1.07]     | 1.05 [1.02-1.08]     |
|                                                      | 5-10times                | 1.12 ** [1.09-1.16]  | 1.08 [1.03-1.13]     | 1 [0.94-1.07]        |
|                                                      | 11-20times               | 1.17 *** [1.12-1.23] | 1.15 * [1.07-1.22]   | 1.12 [1.03-1.21]     |
|                                                      | 21-30times               | 1.08 [1.01-1.16]     | 1.1 [1-1.21]         | 1 [0.89-1.12]        |
|                                                      | 30+times                 | 1.12 ** [1.08-1.16]  | 1.28 *** [1.23-1.34] | 1.25 *** [1.18-1.31] |
| Outdoor job                                          |                          | <b>0.01%</b>         | <b>0.01%</b>         | <b>0.01%</b>         |
|                                                      | no                       |                      |                      |                      |
|                                                      | yes                      | 1.09 *** [1.08-1.11] | 1.09 ** [1.07-1.11]  | 1.1 * [1.08-1.12]    |
| Smoking                                              |                          | <b>0.02%</b>         | <b>0%</b>            | <b>0.01%</b>         |
|                                                      | no                       |                      |                      |                      |
|                                                      | yes                      | 0.93 *** [0.92-0.93] | 0.97 [0.97-0.98]     | 0.95 [0.94-0.96]     |
| Adulthood elevation                                  |                          | <b>0.01%</b>         | <b>0%</b>            | <b>0%</b>            |
|                                                      | 18                       |                      |                      |                      |
|                                                      | 1004                     | 1.06 [1.05-1.07]     | 1.03 [1.02-1.04]     | 0.98 [0.96-1]        |
|                                                      | 2029                     | 1.12 [1.07-1.18]     | 1.06 [0.99-1.13]     | 0.96 [0.88-1.05]     |
| Morning person                                       |                          | <b>0.02%</b>         | <b>0.04%</b>         | <b>0.03%</b>         |
|                                                      | night                    |                      |                      |                      |
|                                                      | morning                  | 1.07 *** [1.07-1.08] | 1.11 *** [1.11-1.12] | 1.09 * [1.09-1.1]    |
| Desk clean                                           |                          | <b>0.03%</b>         | <b>0.02%</b>         | <b>0.02%</b>         |
|                                                      | very clen                |                      |                      |                      |
|                                                      | fairly clean             | 0.99 [0.97-1.01]     | 0.97 [0.94-0.99]     | 0.91 [0.89-0.94]     |
|                                                      | fairly messy             | 0.92 [0.91-0.94]     | 0.91 [0.89-0.93]     | 0.9 [0.87-0.92]      |
|                                                      | very messy               | 0.87 [0.87-0.87]     | 0.86 [0.86-0.86]     | 0.86 [0.86-0.86]     |
| Seasonal allergies                                   |                          | <b>0.02%</b>         | <b>0%</b>            | <b>0.07%</b>         |
|                                                      | no allergy               |                      |                      |                      |
|                                                      | has seasonal allergy     | 0.93 *** [0.93-0.93] | 1.02 [1.02-1.02]     | 0.84 *** [0.84-0.84] |
| <b>Total deviance explained:</b>                     |                          | <b>19.99%</b>        | <b>19.46%</b>        | <b>18.96%</b>        |
| Numbers of cases - controls:                         |                          | 14898/88110          | 7479/95529           | 3998/99010           |

Supplementary Table 9: General linear model (GLM with binomial response) results for 32-risk factor models. See Supplementary Table 4 for a detailed description and Figure 2.

| Variable                                             | Level                    | BCC                  | SCC                  | Melanoma             |
|------------------------------------------------------|--------------------------|----------------------|----------------------|----------------------|
| Age                                                  |                          | 9.87%                | 10.69%               | 3.28%                |
|                                                      | 30                       | 1                    | 1                    | 1                    |
|                                                      | 40                       | 3.5 [2.97-4.13]      | 2.56 [1.97-3.32]     | 1.53 [1.31-1.78]     |
|                                                      | 50                       | 9.14 [7.56-11.06]    | 6.69 [4.94-9.07]     | 2.4 [1.99-2.88]      |
|                                                      | 60                       | 19.76 [16.13-24.22]  | 17.04 [12.25-23.71]  | 3.85 [3.16-4.71]     |
|                                                      | 70                       | 42.1 [34.26-51.75]   | 43.75 [31.23-61.3]   | 6.59 [5.37-8.01]     |
| Sex                                                  | M                        | 0.05%                | 0.09%                | 0.21%                |
|                                                      | F                        | 1                    | 1                    | 1                    |
| Polygenic risk score (PRS)                           |                          | 0.78 *** [0.78-0.79] | 0.73 *** [0.72-0.73] | 0.67 *** [0.66-0.67] |
|                                                      | -1.71                    | 3.05%                | 1.54%                | 1.86%                |
|                                                      | -0.57                    | 0.88 [0.34-2.28]     | 2.49 [1.73-3.6]      | 5.38 [2.97-9.73]     |
|                                                      | 0.57                     | 3.33 [1.29-8.85]     | 5.38 [3.65-7.85]     | 16.28 [8.65-30.83]   |
|                                                      | 1.71                     | 7.68 [5.62-10.5]     | 9.98 [8.77-11.34]    | 27.77 [22.66-34.02]  |
| Dysplastic moles                                     | no                       | 2.95%                | 2.06%                | 11.51%               |
|                                                      | yes                      | 1                    | 1                    | 1                    |
| Family history of skin cancer                        |                          | 2.58 *** [2.55-2.61] | 2.2 *** [2.17-2.23]  | 6.7 *** [6.68-6.71]  |
|                                                      | Risk 0                   | 1.07%                | 0.97%                | 0.17%                |
|                                                      | Risk 1                   | 1.51 [1.48-1.53]     | 1.43 [1.4-1.46]      | 1.17 [1.14-1.2]      |
|                                                      | Risk 2                   | 2.29 [2.17-2.4]      | 2.14 [2.02-2.26]     | 1.25 [1.14-1.36]     |
|                                                      | Risk 3                   | 3.52 [3.01-4.12]     | 3.13 [2.67-3.67]     | 1.46 [1.16-1.84]     |
| Skin color                                           | extremely fair           | 0.29%                | 0.38%                | 0.27%                |
|                                                      | light                    | 1                    | 1                    | 1                    |
|                                                      | medium                   | 0.95 [0.93-0.98]     | 0.92 * [0.89-0.94]   | 0.98 [0.95-1.02]     |
|                                                      | olive                    | 0.84 *** [0.83-0.85] | 0.78 *** [0.77-0.79] | 0.82 ** [0.81-0.84]  |
| Freckling tendency                                   | none                     | 0.68 *** [0.66-0.71] | 0.7 *** [0.67-0.74]  | 0.89 [0.83-0.95]     |
|                                                      | few                      | 0.37%                | 0.38%                | 0.37%                |
|                                                      | lots                     | 1.11 *** [1.1-1.12]  | 1.12 *** [1.11-1.13] | 1.15 ** [1.13-1.17]  |
|                                                      | many                     | 1.32 *** [1.32-1.32] | 1.37 *** [1.37-1.37] | 1.4 *** [1.39-1.4]   |
| Sunbathing frequency before age of 30                | never                    | 1.62 *** [1.56-1.69] | 1.66 *** [1.58-1.73] | 1.56 *** [1.48-1.64] |
|                                                      | rarely                   | 1%                   | 0.87%                | 0.33%                |
|                                                      | sometimes                | 1.06 [1.02-1.1]      | 1.04 [0.99-1.09]     | 0.92 [0.87-0.97]     |
|                                                      | frequently               | 1.4 *** [1.33-1.47]  | 1.27 *** [1.2-1.35]  | 1.03 [0.96-1.11]     |
|                                                      | very frequently          | 1.76 *** [1.68-1.84] | 1.67 *** [1.58-1.77] | 1.26 ** [1.18-1.35]  |
| Actinic keratosis before age of 40                   | no                       | 2.18 [2.11-2.25]     | 2 [1.92-2.09]        | 1.43 [1.37-1.5]      |
|                                                      | yes                      | 0.45%                | 0.64%                | 0.03%                |
| Adulthood latitude                                   | 25                       | 3.15 *** [2.88-3.45] | 3.45 *** [3.17-3.77] | 1.35 ** [1.18-1.55]  |
|                                                      | 35                       | 0.31%                | 0.34%                | 0.03%                |
|                                                      | 45                       | 0.76 [0.4-0.79]      | 0.76 [0.73-0.8]      | 0.95 [0.59-1.01]     |
| BMI                                                  | 20                       | 0.59 [0.57-0.6]      | 0.59 [0.57-0.6]      | 0.9 [0.86-0.94]      |
|                                                      | 25                       | 0.33%                | 0.19%                | 0.01%                |
|                                                      | 30                       | 0.47 [0.42-0.52]     | 0.52 [0.45-0.6]      | 0.76 [0.63-0.92]     |
|                                                      | 35                       | 0.34 [0.3-0.38]      | 0.4 [0.35-0.47]      | 0.67 [0.55-0.8]      |
| Blisters caused by sunburns                          | 0                        | 0.25 [0.23-0.27]     | 0.32 [0.29-0.36]     | 0.59 [0.51-0.67]     |
|                                                      | 1-2                      | 0.2%                 | 0.18%                | 0.1%                 |
|                                                      | 3-4                      | 1.12 *** [1.11-1.13] | 1.21 *** [1.2-1.23]  | 1 [0.99-1.01]        |
|                                                      | 5+                       | 1.23 *** [1.23-1.24] | 1.35 *** [1.33-1.36] | 1.1 [1.09-1.11]      |
| Skin response to 3-4 hours of sun exposure           | never burns              | 1.39 *** [1.38-1.4]  | 1.4 *** [1.38-1.41]  | 1.2 ** [1.19-1.22]   |
|                                                      | usually burns            | 0.11%                | 0.11%                | 0.11%                |
|                                                      | sometimes burns tans     | 0.96 [0.94-0.98]     | 0.94 [0.91-0.96]     | 0.88 [0.85-0.9]      |
|                                                      | rarely burns             | 0.8 [0.78-0.83]      | 0.77 [0.74-0.79]     | 0.74 [0.71-0.77]     |
|                                                      | never burns              | 0.67 [0.66-0.67]     | 0.64 [0.64-0.64]     | 0.63 [0.62-0.63]     |
| Physical activity                                    | no                       | 0.63 [0.55-0.73]     | 0.63 [0.52-0.76]     | 0.78 [0.61-0.99]     |
|                                                      | highly active            | 0.05%                | 0.02%                | 0%                   |
| Typical sun exposure per week                        | 0                        | 1.11 *** [1.11-1.12] | 1.06 [1.05-1.07]     | 1 [0.99-1.01]        |
|                                                      | 320                      | 0.1%                 | 0.09%                | 0.08%                |
|                                                      | 640                      | 1.15 [1.15-1.16]     | 1.18 [1.17-1.19]     | 1.14 [1.12-1.15]     |
|                                                      | 960                      | 1.3 [1.29-1.31]      | 1.27 [1.25-1.28]     | 1.25 [1.23-1.28]     |
|                                                      | 1280                     | 1.42 [1.39-1.46]     | 1.41 [1.37-1.45]     | 1.39 [1.34-1.44]     |
|                                                      | 1600                     | 1.52 [1.43-1.61]     | 1.42 [1.31-1.54]     | 1.49 [1.36-1.64]     |
|                                                      | 1920                     | 1.58 [1.39-1.79]     | 1.36 [1.14-1.61]     | 1.58 [1.29-1.92]     |
| Alcohol consumption                                  | no or (low) consumption  | 1.6 [1.28-2]         | 1.23 [0.9-1.67]      | 1.64 [1.15-2.33]     |
|                                                      | intermediate consumption | 0.04%                | 0.03%                | 0.01%                |
|                                                      | abuser                   | 1.14 *** [1.13-1.14] | 1.12 *** [1.11-1.12] | 1.05 [1.04-1.06]     |
| Weight                                               | 100                      | 1.1 *** [1.1-1.11]   | 1.11 ** [1.11-1.11]  | 0.99 [0.99-1]        |
|                                                      | 201                      | 0.07%                | 0.03%                | 0.04%                |
|                                                      | 299                      | 1.89 [1.72-2.07]     | 1.59 [1.41-1.8]      | 1.55 [1.32-1.81]     |
| Hair color                                           | dark blond               | 3.11 [3.05-3.18]     | 2.3 [2.24-2.36]      | 2.18 [2.11-2.26]     |
|                                                      | red                      | 0.09%                | 0.06%                | 0.08%                |
|                                                      | light brown              | 0.91 [0.88-0.94]     | 0.92 [0.89-0.96]     | 0.81 [0.78-0.85]     |
|                                                      | dark brown               | 0.92 [0.91-0.92]     | 0.95 [0.95-0.95]     | 0.99 [0.99-1]        |
|                                                      | black                    | 0.79 [0.76-0.83]     | 0.86 [0.82-0.9]      | 0.76 [0.71-0.8]      |
| Eye color                                            | blue                     | 0.74 [0.72-0.78]     | 0.82 [0.78-0.87]     | 0.73 [0.68-0.77]     |
|                                                      | gray                     | 0.64 *** [0.62-0.66] | 0.7 *** [0.67-0.74]  | 0.81 [0.75-0.86]     |
|                                                      | green                    | 0.02%                | 0.05%                | 0.01%                |
|                                                      | light brown              | 0.92 [0.91-0.94]     | 0.89 [0.87-0.91]     | 0.95 [0.92-0.97]     |
|                                                      | medium brown             | 0.78 * [0.64-0.94]   | 0.81 [0.64-1.02]     | 1.04 [0.79-1.38]     |
|                                                      | dark brown black         | 0.99 [0.97-1]        | 0.88 [0.86-0.9]      | 1.03 [1-1.06]        |
| Presence of large moles                              | no                       | 1.05 [1.04-1.06]     | 0.99 [0.98-1]        | 1.02 [1.01-1.03]     |
|                                                      | yes                      | 1.01 [0.97-1.04]     | 0.92 [0.88-0.96]     | 0.94 [0.88-1]        |
|                                                      | blister                  | 1.02 [1.02-1.03]     | 0.86 [0.85-0.87]     | 0.96 [0.94-0.97]     |
|                                                      | burns sometimes          | 1.04 [1-1.07]        | 0.85 [0.81-0.89]     | 0.9 [0.85-0.96]      |
|                                                      | rarely burns             | 0.06%                | 0.02%                | 0.3%                 |
|                                                      | never burns              | 1.19 *** [1.18-1.2]  | 1.13 *** [1.12-1.14] | 1.33 *** [1.32-1.35] |
| Moles in your right arm                              | less than 3              | 0.02%                | 0.05%                | 0.36%                |
|                                                      | 3 to 6                   | 0.93 [0.91-0.95]     | 0.9 [0.88-0.93]      | 1.14 [1.11-1.17]     |
|                                                      | 7 to 11                  | 0.94 [0.91-0.97]     | 0.88 [0.84-0.93]     | 1.37 [1.31-1.44]     |
|                                                      | 12 to 18                 | 0.89 [0.85-0.94]     | 0.79 [0.74-0.86]     | 1.55 [1.46-1.64]     |
|                                                      | 19 to 28                 | 1.02 [0.95-1.1]      | 0.86 [0.78-0.95]     | 1.57 [1.45-1.71]     |
|                                                      | 29 to 39                 | 0.9 [0.81-1]         | 0.81 [0.69-0.94]     | 1.66 [1.48-1.87]     |
|                                                      | more than 39             | 1.06 [0.95-1.17]     | 0.84 [0.72-0.98]     | 2.16 [1.96-2.39]     |
| Childhood latitude                                   | 25                       | 0.02%                | 0.03%                | 0.02%                |
|                                                      | 35                       | 0.89 [0.86-0.93]     | 0.87 [0.83-0.91]     | 0.89 [0.83-0.94]     |
|                                                      | 45                       | 0.8 [0.78-0.83]      | 0.76 [0.73-0.79]     | 0.79 [0.74-0.83]     |
| Sun hair lightening                                  | very much                | 0.01%                | 0.02%                | 0.02%                |
|                                                      | somewhat                 | 0.95 [0.91-0.99]     | 0.91 [0.86-0.96]     | 0.89 [0.84-0.94]     |
|                                                      | a little bit             | 0.96 [0.91-1]        | 0.94 [0.89-1]        | 0.96 [0.89-1.03]     |
|                                                      | unchanged                | 1.02 [0.98-1.07]     | 1.01 [0.96-1.07]     | 1 [0.94-1.07]        |
| Skin response to sun exposure without sun protection | painful blister          | 0.02%                | 0.02%                | 0.01%                |
|                                                      | blister                  | 1.01 [1.01-1.02]     | 0.99 [0.98-0.99]     | 1.08 [1.07-1.08]     |
|                                                      | burns sometimes          | 1.11 [1.08-1.14]     | 1.1 [1.07-1.14]      | 1.06 [1.02-1.11]     |
|                                                      | rarely burns             | 1.05 [1.04-1.06]     | 1.05 [1.03-1.06]     | 1.06 [1.03-1.1]      |
|                                                      | never burns              | 0.84 [0.68-1.04]     | 0.81 [0.61-1.08]     | 1.13 [0.79-1.6]      |
| Tanning bed                                          | never                    | 0.02%                | 0.04%                | 0.03%                |
|                                                      | 1-4times                 | 1.05 [1.03-1.06]     | 1.04 [1.02-1.08]     | 1.05 [1.02-1.08]     |
|                                                      | 5-10times                | 1.12 ** [1.08-1.16]  | 1.08 [1.03-1.13]     | 1.01 [0.95-1.07]     |
|                                                      | 11-20times               | 1.16 ** [1.1-1.21]   | 1.13 [1.06-1.21]     | 1.11 [1.02-1.2]      |
|                                                      | 21-30times               | 1.07 [1-1.14]        | 1.09 [0.99-1.2]      | 1 [0.89-1.12]        |
|                                                      | 30+times                 | 1.1 * [1.06-1.14]    | 1.26 *** [1.21-1.31] | 1.23 ** [1.17-1.29]  |
| Outdoor job                                          | no                       | 0.01%                | 0.01%                | 0.01%                |
|                                                      | yes                      | 1.09 *** [1.08-1.1]  | 1.08 * [1.06-1.1]    | 1.09 * [1.07-1.11]   |
| Smoking                                              | no                       | 0.02%                | 0%                   | 0.01%                |
|                                                      | yes                      | 0.92 *** [0.92-0.93] | 0.97 [0.96-0.97]     | 0.94 [0.93-0.95]     |
| Adulthood elevation                                  | 18                       | 0.01%                | 0%                   | 0%                   |
|                                                      | 1004                     | 1.06 [1.05-1.07]     | 1.03 [1.01-1.04]     | 0.98 [0.97-1]        |
|                                                      | 2029                     | 1.13 [1.07-1.18]     | 1.05 [0.99-1.12]     | 0.97 [0.89-1.06]     |
| Morning person                                       | night                    | 0.03%                | 0.03%                | 0.01%                |
|                                                      | morning                  | 1.1 *** [1.1-1.1]    | 1.1 *** [1.1-1.1]    | 1.04 [1.04-1.05]     |
| Desk clean                                           | very clean               | 0.02%                | 0.02%                | 0.04%                |
|                                                      | fairly clean             | 1.01 [1-1.03]        | 0.97 [0.95-0.99]     | 0.86 [0.84-0.89]     |
|                                                      | fairly messy             | 0.96 [0.94-0.97]     | 0.92 [0.9-0.94]      | 0.85 [0.83-0.87]     |
|                                                      | very messy               | 0.92 [0.92-0.92]     | 0.88 [0.88-0.88]     | 0.81 [0.81-0.81]     |
| Seasonal allergies                                   | no allergy               | 0.02%                | 0%                   | 0.07%                |
|                                                      | has seasonal allergy     | 0.92 *** [0.92-0.93] | 1.02 [1.02-1.02]     | 0.84 *** [0.84-0.84] |
| <b>Total deviance explained:</b>                     |                          | <b>21.65%</b>        | <b>19.95%</b>        | <b>19.81%</b>        |
| Numbers of cases - controls:                         |                          | 14874/88026          | 7472/95428           | 3994/98906           |

Supplementary Table 10: Variants identified by GWAS performed on the training set, and used in the PRS for each three skin cancer.

Variant genomic positions from hg19 build.

| Basal cell carcinoma    |     |           |                 |             |                   |             |
|-------------------------|-----|-----------|-----------------|-------------|-------------------|-------------|
| Variant ID              | Chr | Pos       | Non-risk allele | Risk allele | Genes             | Coefficient |
| rs2476601               | 1   | 114377568 | A               | G           | PTPN22            | 0.0873      |
| rs74520550              | 1   | 155006450 | A               | C           | DCST1             | -0.0754     |
| rs60960598              | 1   | 17744532  | -               | T           | RCC2              | 0.1308      |
| rs61824911              | 1   | 228979737 | A               | G           | RHOA,TMEM78       | 0.0843      |
| rs12568757              | 1   | 150729793 | A               | G           | CTSS              | -0.0587     |
| rs2349073               | 2   | 202186986 | A               | C           | ALS2CR12          | 0.1199      |
| rs6707137               | 2   | 88554351  | A               | G           | THNSL2,FOXI3      | 0.1529      |
| rs16982253              | 2   | 16498408  | C               | T           | MYCN,FAM49A       | 0.1244      |
| rs831544                | 2   | 74125261  | A               | C           | ACTG2             | 0.0321      |
| rs10932028              | 2   | 204793063 | A               | C           | CTLA4,ICOS        | -0.0519     |
| rs143325404             | 2   | 38308857  | C               | G           | CYP1B1,ATL2       | 0.0584      |
| rs11720317              | 3   | 20619752  | C               | T           | SGO1,ZNF385D      | 0.0381      |
| rs13076312              | 3   | 188089254 | C               | T           | LPP               | -0.0759     |
| rs57929572              | 3   | 71563561  | C               | T           | FOXP1             | 0.1015      |
| rs401681                | 5   | 1322087   | C               | T           | CLPTM1L           | -0.1018     |
| rs727685                | 5   | 115968619 | C               | G           | SEMA6A            | -0.0402     |
| rs16891982              | 5   | 33951693  | C               | G           | SLC45A2           | 0.5672      |
| rs115293868             | 6   | 32649308  | A               | G           | HLA-DQB1,HLA-DQA2 | -0.101      |
| rs12203592              | 6   | 396321    | C               | T           | IRF4              | 0.4187      |
| rs56353819              | 6   | 91012867  | C               | T           | BACH2,MAP3K7      | -0.0794     |
| rs2016246               | 7   | 129431529 | C               | T           | NRF1,UBE2H        | 0.0254      |
| rs73183650              | 7   | 101421000 | A               | T           | MYL10,CUX1        | -0.0988     |
| rs62445146              | 7   | 17088083  | C               | G           | AGR3,AHR          | 0.0922      |
| rs17431544              | 8   | 77467488  | G               | T           | HNF4G,ZFXH4       | 0.1676      |
| rs3901080               | 8   | 81410116  | G               | T           | ZBTB10            | 0.0764      |
| rs28792460              | 8   | 101007669 | A               | G           | RGS22             | -0.1629     |
| rs55987622              | 8   | 126481470 | C               | T           | TRIB1             | 0.0874      |
| rs13300853              | 9   | 16901228  | C               | T           | BNC2,CNTLN        | -0.1069     |
| rs2518723               | 9   | 21995882  | C               | T           | RP11-145E5.5      | 0.0944      |
| rs57288860              | 9   | 106973791 | -               | T           | SMC2,OR13F1       | -0.0619     |
| rs7067933               | 10  | 90615570  | C               | G           | ANKRD22,STAMBPL1  | 0.0452      |
| rs77097907              | 10  | 8946470   | A               | C           | GATA3             | 0.1933      |
| rs2193                  | 11  | 3870799   | A               | G           | RHOA,STIM1        | 0.0761      |
| rs12575636              | 11  | 95311260  | G               | T           | SESN3,FAM76B      | 0.0762      |
| rs1126809               | 11  | 89017961  | A               | G           | TYR               | -0.171      |
| rs11023815              | 11  | 16007239  | C               | G           | SOX6              | 0.0596      |
| rs200633324             | 12  | 52898782  | -               | TTC         | KRT6A,KRT5        | 0.0951      |
| rs75273011              | 12  | 47030440  | A               | T           | SLC38A2,SLC38A4   | -0.057      |
| rs1577900               | 13  | 100766817 | A               | G           | PCCA              | -0.0616     |
| rs2526887               | 14  | 71355048  | A               | G           | MAP3K9,PCNX1      | 0.0307      |
| rs1129038               | 15  | 28356859  | C               | T           | HERC2             | 0.1253      |
| rs1805007               | 16  | 89986117  | C               | T           | MC1R              | 0.3374      |
| rs6059655               | 20  | 32665748  | A               | A           | ASIP              | -0.2945     |
| rs75653149              | 20  | 34726973  | A               | C           | CNBD2,EPB41L1     | -0.0145     |
| rs214803                | 20  | 2290333   | A               | C           | TGM3              | 0.157       |
| rs2849699               | 21  | 43089086  | C               | G           | TMPRSS2,RIPK4     | -0.0761     |
| rs5932909               | 23  | 130553877 | A               | T           | IGSF1,OR13H1      | 0.0594      |
| Squamous cell carcinoma |     |           |                 |             |                   |             |
| Variant ID              | Chr | Pos       | Non-risk allele | Risk allele | Genes             | Coefficient |
| rs2352551               | 2   | 204794757 | C               | T           | CTLA4,ICOS        | -0.1        |
| rs3773031               | 3   | 29535317  | A               | G           | RP11-9J18.1,RBMS3 | -0.037      |
| rs16891982              | 5   | 33951693  | C               | G           | SLC45A2           | 0.5177      |
| rs116687190             | 6   | 32652865  | C               | T           | HLA-DQB1,HLA-DQA2 | -0.0862     |
| rs12203592              | 6   | 396321    | C               | T           | IRF4              | 0.4163      |
| rs16939289              | 8   | 77437038  | A               | T           | HNF4G,ZFXH4       | -0.136      |
| rs868764                | 9   | 129281648 | A               | G           | MVB12B,LMX1B      | 0.0572      |
| rs7025549               | 9   | 16881256  | G               | T           | BNC2,CNTLN        | -0.1028     |
| rs1126809               | 11  | 89017961  | A               | G           | TYR               | -0.1575     |
| rs896513                | 12  | 130240775 | C               | T           | TMEM132D          | -0.0072     |
| rs201156703             | 16  | 90052186  | -               | TA          | MC1R              | -0.4271     |
| rs12456267              | 18  | 49148119  | A               | T           | MEX3C,DCC         | -0.0717     |
| rs75653149              | 20  | 34726973  | A               | C           | CNBD2,EPB41L1     | -0.0402     |
| rs6059655               | 20  | 32665748  | A               | G           | ASIP              | -0.2663     |
| Melanoma                |     |           |                 |             |                   |             |
| Variant ID              | Chr | Pos       | Non-risk allele | Risk allele | Genes             | Coefficient |
| rs2791368               | 1   | 245918151 | C               | T           | SMYD3             | 0.0914      |
| rs907188                | 1   | 226612826 | G               | T           | PARP1,STUM        | -0.126      |
| rs4235327               | 4   | 25026034  | G               | T           | LGI2              | -0.0549     |
| rs16891982              | 5   | 33951693  | C               | G           | SLC45A2           | 0.4679      |
| rs7712562               | 5   | 1296072   | A               | G           | TERT,CLPTM1L      | -0.1498     |
| rs201414626             | 7   | 28209954  | -               | AT          | JAZF1             | -0.0635     |
| chr9:21808605           | 9   | 21808606  | -               | C           | MTAP,RP11-145E5.5 | 0.1402      |
| rs75387125              | 10  | 89931260  | C               | T           | PTEN,RNLS         | -0.3006     |
| rs4432037               | 11  | 57103797  | C               | T           | SSRP1,P2RX3       | 0.0359      |
| rs1126809               | 11  | 89017961  | A               | A           | TYR               | -0.139      |
| rs4899263               | 14  | 69285264  | A               | G           | ZFP36L1,ACTN1     | -0.0431     |
| rs35083644              | 14  | 29547008  | C               | T           | FOXG1,PRKD1       | -0.0404     |
| rs200180665             | 15  | 94068177  | -               | G           | AC112693.2,MCTP2  | 0.1404      |
| rs4778138               | 15  | 28335820  | A               | G           | HERC2             | -0.1732     |
| rs1805007               | 16  | 89986117  | C               | T           | MC1R              | 0.4361      |
| rs56238684              | 20  | 33236696  | C               | G           | ASIP              | -0.2889     |
| rs75653149              | 20  | 34726973  | A               | C           | CNBD2,EPB41L1     | -0.0263     |
| rs2824133               | 21  | 18292297  | A               | G           | CXADR             | -0.0849     |



**Supplementary Table 12: General linear model (GLM with binomial response) results for pairwise interaction analysis between risk scores.**

*Only interactions with P-value < 0.1 are reported.*

| <b>Basal cell carcinoma</b>                  |          |            |         |          |                    |
|----------------------------------------------|----------|------------|---------|----------|--------------------|
|                                              | Estimate | Std. Error | z value | P value  | Deviance explained |
| (Intercept)                                  | -24.482  | 0.893      | -27.41  | 2.0e-165 |                    |
| Age                                          | 0.138    | 0.009      | 16.04   | 6.9e-58  | 9.52%              |
| Sex                                          | 0.516    | 0.214      | 2.41    | 1.6e-02  | 0.04%              |
| Ancestry                                     | 3.849    | 0.475      | 8.09    | 5.7e-16  | 0.58%              |
| PRS                                          | 1.854    | 0.194      | 9.58    | 1.0e-21  | 3.41%              |
| Family history of skin cancer                | 1.421    | 0.211      | 6.73    | 1.7e-11  | 1.4%               |
| Mole                                         | 10.417   | 1.058      | 9.84    | 7.3e-23  | 3.42%              |
| Susceptibility                               | 9.077    | 0.871      | 10.43   | 1.9e-25  | 1.03%              |
| Exposure                                     | 8.425    | 0.94       | 8.96    | 3.2e-19  | 1.6%               |
| Age:Sex                                      | -0.009   | 0.002      | -5.04   | 4.6e-07  | 0.03%              |
| Age:PRS                                      | -0.007   | 0.002      | -3.58   | 3.4e-04  | 0.01%              |
| Age:Family history of skin cancer            | -0.003   | 0.002      | -2.11   | 3.5e-02  | 0%                 |
| Age:Mole                                     | -0.045   | 0.008      | -5.7    | 1.2e-08  | 0.03%              |
| Age:Exposure                                 | -0.032   | 0.011      | -3.07   | 2.2e-03  | 0.01%              |
| Sex:Family history of skin cancer            | -0.112   | 0.035      | -3.24   | 1.2e-03  | 0.02%              |
| Sex:Mole                                     | 0.366    | 0.186      | 1.97    | 4.9e-02  | 0%                 |
| Sex:Susceptibility                           | -0.861   | 0.246      | -3.5    | 4.6e-04  | 0.02%              |
| PRS:Family history of skin cancer            | -0.079   | 0.035      | -2.27   | 2.3e-02  | 0.01%              |
| PRS:Susceptibility                           | -1.043   | 0.243      | -4.29   | 1.8e-05  | 0.02%              |
| Family history of skin cancer:Susceptibility | -0.359   | 0.209      | -1.72   | 8.5e-02  | 0%                 |
| Family history of skin cancer:Exposure       | -0.599   | 0.193      | -3.1    | 1.9e-03  | 0.01%              |
| Mole:Susceptibility                          | -3.371   | 1.085      | -3.11   | 1.9e-03  | 0.01%              |
| Mole:Exposure                                | -3.377   | 1.077      | -3.14   | 1.7e-03  | 0.01%              |

  

| <b>Squamous cell carcinoma</b>    |          |            |         |         |                    |
|-----------------------------------|----------|------------|---------|---------|--------------------|
|                                   | Estimate | Std. Error | z value | P value | Deviance explained |
| (Intercept)                       | -22.98   | 1.522      | -15.1   | 1.6e-51 |                    |
| Age                               | 0.124    | 0.006      | 19.41   | 6.4e-84 | 10.39%             |
| Sex                               | 0.222    | 0.226      | 0.98    | 3.3e-01 | 0.07%              |
| Ancestry                          | 12.822   | 2.876      | 4.46    | 8.3e-06 | 0.89%              |
| PRS                               | 0.3      | 0.21       | 1.43    | 1.5e-01 | 1.61%              |
| Family history of skin cancer     | 0.516    | 0.032      | 15.88   | 9.1e-57 | 1.25%              |
| Mole                              | 8.511    | 0.79       | 10.77   | 4.8e-27 | 2.77%              |
| Susceptibility                    | 12.62    | 2.719      | 4.64    | 3.5e-06 | 1.08%              |
| Exposure                          | 4.703    | 0.312      | 15.09   | 1.8e-51 | 1.39%              |
| Age:Sex                           | -0.011   | 0.002      | -4.37   | 1.3e-05 | 0.04%              |
| Age:Mole                          | -0.067   | 0.012      | -5.79   | 6.9e-09 | 0.07%              |
| Sex:Family history of skin cancer | -0.209   | 0.041      | -5.07   | 3.9e-07 | 0.05%              |
| Sex:Mole                          | 0.326    | 0.262      | 1.24    | 2.1e-01 | 0%                 |
| Ancestry:Susceptibility           | -16.969  | 5.367      | -3.16   | 1.6e-03 | 0.02%              |
| PRS:Exposure                      | 0.66     | 0.402      | 1.64    | 1.0e-01 | 0.01%              |

  

| <b>Melanoma</b>                    |          |            |         |          |                    |
|------------------------------------|----------|------------|---------|----------|--------------------|
|                                    | Estimate | Std. Error | z value | P value  | Deviance explained |
| (Intercept)                        | -19.447  | 0.731      | -26.62  | 4.4e-156 |                    |
| Age                                | 0.099    | 0.005      | 20.97   | 1.2e-97  | 3.27%              |
| Sex                                | 0.511    | 0.331      | 1.54    | 1.2e-01  | 0.2%               |
| Ancestry                           | 3.946    | 0.738      | 5.35    | 8.9e-08  | 0.2%               |
| PRS                                | 0.207    | 1.116      | 0.19    | 8.5e-01  | 2.03%              |
| Family history of skin cancer      | 0.42     | 0.093      | 4.52    | 6.1e-06  | 0.47%              |
| Mole                               | 11.142   | 0.864      | 12.9    | 4.4e-38  | 11.8%              |
| Susceptibility                     | 4.656    | 0.311      | 14.96   | 1.3e-50  | 0.9%               |
| Exposure                           | 6.83     | 0.996      | 6.86    | 6.9e-12  | 0.51%              |
| Age:Sex                            | -0.014   | 0.003      | -4.98   | 6.3e-07  | 0.14%              |
| Age:Mole                           | -0.07    | 0.007      | -10.55  | 5.0e-26  | 0.38%              |
| Sex:PRS                            | 0.167    | 0.106      | 1.58    | 1.1e-01  | 0%                 |
| Sex:Family history of skin cancer  | -0.143   | 0.056      | -2.56   | 1.0e-02  | 0.03%              |
| Sex:Mole                           | 0.948    | 0.166      | 5.7     | 1.2e-08  | 0.08%              |
| Sex:Susceptibility                 | -1.345   | 0.434      | -3.1    | 1.9e-03  | 0.03%              |
| Ancestry:PRS                       | 3.919    | 2.171      | 1.81    | 7.1e-02  | 0.01%              |
| PRS:Susceptibility                 | -2.555   | 0.583      | -4.38   | 1.2e-05  | 0.06%              |
| Family history of skin cancer:Mole | -0.292   | 0.129      | -2.26   | 2.4e-02  | 0.02%              |
| Mole:Exposure                      | -4.407   | 1.423      | -3.1    | 2.0e-03  | 0.03%              |

**Supplementary Table 13: General linear model (GLM with binomial response) results for pairwise interaction analysis using the factor with larger effect in each risk score.**

*Only interactions with P-value < 0.1 are reported.*

| <b>Basal cell carcinoma</b>                                      |          |            |         |          |                    |  |
|------------------------------------------------------------------|----------|------------|---------|----------|--------------------|--|
|                                                                  | Estimate | Std. Error | z value | P value  | Deviance explained |  |
| (Intercept)                                                      | -17.172  | 0.674      | -25.47  | 3.8e-143 |                    |  |
| Age                                                              | 0.117    | 0.006      | 18.24   | 2.4e-74  | 9.52%              |  |
| Sex                                                              | 0.239    | 0.19       | 1.26    | 2.1e-01  | 0.04%              |  |
| Ancestry                                                         | 4.878    | 0.465      | 10.48   | 1.0e-25  | 0.58%              |  |
| PRS                                                              | 1.871    | 0.186      | 10.06   | 8.4e-24  | 3.41%              |  |
| Family history of skin cancer                                    | 1.223    | 0.16       | 7.64    | 2.2e-14  | 1.4%               |  |
| Dysplastic moles                                                 | 2.2      | 0.224      | 9.82    | 9.4e-23  | 2.73%              |  |
| Skin color                                                       | -0.6     | 0.083      | -7.22   | 5.3e-13  | 0.28%              |  |
| Sunbathing frequency before age 30                               | 0.725    | 0.081      | 8.92    | 4.5e-19  | 1.12%              |  |
| BMI                                                              | 0.017    | 0.012      | 1.39    | 1.7e-01  | 0.31%              |  |
| Age:Sex                                                          | -0.009   | 0.002      | -4.69   | 2.7e-06  | 0.04%              |  |
| Age:PRS                                                          | -0.007   | 0.002      | -3.9    | 9.8e-05  | 0.01%              |  |
| Age:Family history of skin cancer                                | -0.003   | 0.002      | -2.19   | 2.8e-02  | 0%                 |  |
| Age:Dysplastic moles                                             | -0.009   | 0.002      | -4.71   | 2.5e-06  | 0.02%              |  |
| Age:Sunbathing frequency before age 30                           | -0.003   | 0.001      | -3.47   | 5.2e-04  | 0.01%              |  |
| Sex:Family history of skin cancer                                | -0.108   | 0.034      | -3.17   | 1.5e-03  | 0.02%              |  |
| Sex:Dysplastic moles                                             | 0.179    | 0.047      | 3.78    | 1.6e-04  | 0.01%              |  |
| Sex:Skin color                                                   | 0.081    | 0.027      | 3       | 2.7e-03  | 0.01%              |  |
| Sex:BMI                                                          | -0.012   | 0.004      | -3.06   | 2.2e-03  | 0.02%              |  |
| PRS:Family history of skin cancer                                | -0.091   | 0.033      | -2.75   | 6.0e-03  | 0.01%              |  |
| PRS:Dysplastic moles                                             | -0.183   | 0.049      | -3.76   | 1.7e-04  | 0.02%              |  |
| PRS:Skin color                                                   | 0.062    | 0.027      | 2.33    | 2.0e-02  | 0.01%              |  |
| PRS:BMI                                                          | -0.009   | 0.004      | -2.25   | 2.4e-02  | 0%                 |  |
| Family history of skin cancer:Dysplastic moles                   | -0.087   | 0.035      | -2.49   | 1.3e-02  | 0.01%              |  |
| Family history of skin cancer:Sunbathing frequency before age 30 | -0.032   | 0.015      | -2.13   | 3.3e-02  | 0.01%              |  |
| Dysplastic moles:Skin color                                      | 0.083    | 0.031      | 2.66    | 7.9e-03  | 0%                 |  |
| Dysplastic moles:Sunbathing frequency before age 30              | -0.08    | 0.022      | -3.64   | 2.7e-04  | 0.02%              |  |
| Sunbathing frequency before age 30:BMI                           | -0.004   | 0.002      | -2.52   | 1.2e-02  | 0.01%              |  |

  

| <b>Squamous cell carcinoma</b>                 |          |            |         |          |                    |  |
|------------------------------------------------|----------|------------|---------|----------|--------------------|--|
|                                                | Estimate | Std. Error | z value | P value  | Deviance explained |  |
| (Intercept)                                    | -10.476  | 0.875      | -11.97  | 5.4e-33  |                    |  |
| Age                                            | 0.111    | 0.005      | 21.51   | 1.2e-102 | 10.39%             |  |
| Sex                                            | 0.525    | 0.198      | 2.66    | 7.9e-03  | 0.07%              |  |
| Ancestry                                       | 1.522    | 1.465      | 1.04    | 3.0e-01  | 0.89%              |  |
| PRS                                            | 1.164    | 0.105      | 11.1    | 1.3e-28  | 1.61%              |  |
| Family history of skin cancer                  | 0.922    | 0.119      | 7.74    | 9.9e-15  | 1.25%              |  |
| Dysplastic moles                               | 1.284    | 0.261      | 4.92    | 8.8e-07  | 1.85%              |  |
| Skin color                                     | -1.015   | 0.351      | -2.89   | 3.8e-03  | 0.38%              |  |
| Sunbathing frequency before age 30             | 0.266    | 0.013      | 21.2    | 1.0e-99  | 0.94%              |  |
| BMI                                            | -0.025   | 0.009      | -2.86   | 4.2e-03  | 0.17%              |  |
| Age:Sex                                        | -0.013   | 0.002      | -5.21   | 1.9e-07  | 0.05%              |  |
| Age:Dysplastic moles                           | -0.014   | 0.003      | -5.39   | 7.1e-08  | 0.05%              |  |
| Age:Skin color                                 | -0.004   | 0.002      | -2.62   | 8.8e-03  | 0.01%              |  |
| Sex:Family history of skin cancer              | -0.194   | 0.041      | -4.77   | 1.8e-06  | 0.04%              |  |
| Sex:Dysplastic moles                           | 0.135    | 0.059      | 2.3     | 2.1e-02  | 0.01%              |  |
| Ancestry:Skin color                            | 1.751    | 0.654      | 2.68    | 7.4e-03  | 0.01%              |  |
| PRS:Dysplastic moles                           | -0.248   | 0.077      | -3.21   | 1.3e-03  | 0.03%              |  |
| Family history of skin cancer:Dysplastic moles | -0.107   | 0.042      | -2.57   | 1.0e-02  | 0.01%              |  |
| Family history of skin cancer:BMI              | -0.008   | 0.004      | -2.12   | 3.4e-02  | 0.01%              |  |
| Dysplastic moles:Skin color                    | 0.069    | 0.04       | 1.75    | 8.1e-02  | 0.01%              |  |
| Dysplastic moles:BMI                           | 0.01     | 0.005      | 1.88    | 6.0e-02  | 0.01%              |  |

  

| <b>Melanoma</b>                                |          |            |         |          |                    |  |
|------------------------------------------------|----------|------------|---------|----------|--------------------|--|
|                                                | Estimate | Std. Error | z value | P value  | Deviance explained |  |
| (Intercept)                                    | -13.774  | 0.536      | -25.67  | 2.2e-145 |                    |  |
| Age                                            | 0.093    | 0.005      | 19.65   | 6.4e-86  | 3.27%              |  |
| Sex                                            | -0.204   | 0.255      | -0.8    | 4.2e-01  | 0.2%               |  |
| Ancestry                                       | 4.055    | 0.72       | 5.63    | 1.8e-08  | 0.2%               |  |
| PRS                                            | 0.74     | 0.144      | 5.12    | 3.0e-07  | 2.03%              |  |
| Family history of skin cancer                  | 0.489    | 0.093      | 5.25    | 1.6e-07  | 0.47%              |  |
| Dysplastic moles                               | 3.933    | 0.208      | 18.9    | 1.1e-79  | 11.26%             |  |
| Skin color                                     | -0.226   | 0.073      | -3.1    | 1.9e-03  | 0.27%              |  |
| Sunbathing frequency before age 30             | 0.224    | 0.047      | 4.71    | 2.5e-06  | 0.31%              |  |
| BMI                                            | -0.002   | 0.003      | -0.57   | 5.7e-01  | 0%                 |  |
| Age:Sex                                        | -0.016   | 0.003      | -5.77   | 8.1e-09  | 0.17%              |  |
| Age:Dysplastic moles                           | -0.029   | 0.003      | -10.31  | 6.6e-25  | 0.38%              |  |
| Sex:Family history of skin cancer              | -0.139   | 0.055      | -2.52   | 1.2e-02  | 0.02%              |  |
| Sex:Dysplastic moles                           | 0.395    | 0.071      | 5.58    | 2.4e-08  | 0.09%              |  |
| Sex:Skin color                                 | 0.145    | 0.048      | 3.04    | 2.4e-03  | 0.02%              |  |
| PRS:Skin color                                 | 0.142    | 0.065      | 2.17    | 3.0e-02  | 0.02%              |  |
| Family history of skin cancer:Dysplastic moles | -0.134   | 0.055      | -2.43   | 1.5e-02  | 0.02%              |  |
| Skin color:Sunbathing frequency before age 30  | -0.03    | 0.021      | -1.42   | 1.6e-01  | 0.01%              |  |

Supplementary Table 14: Risk factor weights for DRS and DRSA computation

| Risk factor                                                            | BCC       | SCC        | Melanoma   |
|------------------------------------------------------------------------|-----------|------------|------------|
| Age                                                                    | 0.0761    | 0.0823     | 0.0461     |
| Sex (M)                                                                | 0.1526    | -0.4404    | 0.0333     |
| Sex (F)                                                                | -0.0909   | -0.7604    | -0.3717    |
| PC1                                                                    | -0.5256   | 0.0642     | -0.9599    |
| PC2                                                                    | 3.4687    | 4.24       | 2.2686     |
| PC3                                                                    | -2.2573   | -2.8384    | -1.2158    |
| PC4                                                                    | -2.628    | -4.4661    | -5.2706    |
| PC5                                                                    | 0.3858    | 0.1474     | 1.2237     |
| PRS                                                                    | 0.5998    | 0.6454     | 0.96       |
| Dysplastic moles (no)                                                  | -0.1356   | -0.7474    | -0.4968    |
| Dysplastic moles (yes)                                                 | 0.8127    | 0.0403     | 1.4048     |
| Family history of skin cancer (Risk 0)                                 | -0.0756   | -0.7025    | -0.2294    |
| Family history of skin cancer (Risk 1)                                 | 0.3348    | -0.3458    | -0.074     |
| Family history of skin cancer (Risk 2)                                 | 0.7509    | 0.0578     | -0.0068    |
| Family history of skin cancer (Risk 3)                                 | 1.183     | 0.4386     | 0.1498     |
| Skin color (extremely fair)                                            | 0.1119    | -0.4854    | -0.1298    |
| Skin color (light)                                                     | 0.0651    | -0.5723    | -0.1491    |
| Skin color (medium)                                                    | -0.0623   | -0.7397    | -0.323     |
| Skin color (olive)                                                     | -0.2665   | -0.8405    | -0.2489    |
| Freckling tendency (none)                                              | -0.1111   | -0.7609    | -0.3509    |
| Freckling tendency (few)                                               | -0.0079   | -0.6488    | -0.2099    |
| Freckling tendency (lots)                                              | 0.1656    | -0.4448    | -0.0163    |
| Freckling tendency (many)                                              | 0.3713    | -0.257     | 0.0923     |
| Sunbathing frequency before age of 30 (never)                          | -0.3284   | -0.908     | -0.2803    |
| Sunbathing frequency before age of 30 (rarely)                         | -0.273    | -0.8701    | -0.3669    |
| Sunbathing frequency before age of 30 (sometimes)                      | 0.0081    | -0.6658    | -0.2461    |
| Sunbathing frequency before age of 30 (frequently)                     | 0.2344    | -0.3942    | -0.0475    |
| Sunbathing frequency before age of 30 (very frequently)                | 0.4506    | -0.2147    | 0.0767     |
| Actinic keratosis before age of 40 (no)                                | -0.0024   | -0.6406    | -0.2031    |
| Actinic keratosis before age of 40 (yes)                               | 1.1447    | 0.5988     | 0.0996     |
| Adulthood latitude                                                     | -0.0268   | -0.0268    | -0.0054    |
| BMI                                                                    | -0.0482   | -0.032     | -0.0256    |
| Blisters caused by sunburns (0)                                        | -0.1421   | -0.8226    | -0.2621    |
| Blisters caused by sunburns (1-2)                                      | -0.0302   | -0.6286    | -0.263     |
| Blisters caused by sunburns (3-4)                                      | 0.0688    | -0.5259    | -0.1644    |
| Blisters caused by sunburns (5+)                                       | 0.1883    | -0.4889    | -0.0774    |
| Skin response to 3-4 hours of sun exposure (always burns)              | 0.2101    | -0.3918    | 0.0647     |
| Skin response to 3-4 hours of sun exposure (usually burns)             | 0.1688    | -0.4576    | -0.0673    |
| Skin response to 3-4 hours of sun exposure (sometimes burns tans)      | -0.0076   | -0.6564    | -0.2345    |
| Skin response to 3-4 hours of sun exposure (rarely burns)              | -0.1939   | -0.8387    | -0.4035    |
| Skin response to 3-4 hours of sun exposure (never burns)               | -0.2509   | -0.8533    | -0.1847    |
| Physical activity (no)                                                 | -0.0563   | -0.66      | -0.2003    |
| Physical activity (highly active)                                      | 0.051     | -0.6043    | -0.1984    |
| Typical sun exposure per week (in min.)                                | 1.209e-04 | -1.418e-04 | 1.709e-04  |
| Alcohol consumption (no or (low) consumption)                          | -0.0678   | -0.6978    | -0.2185    |
| Alcohol consumption (intermediate consumption)                         | 0.0619    | -0.5868    | -0.1698    |
| Alcohol consumption (abuser)                                           | 0.0312    | -0.5951    | -0.2238    |
| Weight                                                                 | 0.0051    | 0.0038     | 0.0035     |
| Hair color (light blond)                                               | 0.2351    | -0.4749    | 0.0574     |
| Hair color (dark blond)                                                | 0.1371    | -0.5559    | -0.1532    |
| Hair color (red)                                                       | 0.1474    | -0.5258    | 0.0489     |
| Hair color (light brown)                                               | 0.0031    | -0.6248    | -0.2223    |
| Hair color (dark brown)                                                | -0.0594   | -0.6678    | -0.2616    |
| Hair color (black)                                                     | -0.212    | -0.826     | -0.1578    |
| Eye color (blue)                                                       | 0.01      | -0.5477    | -0.178     |
| Eye color (blue gray)                                                  | -0.069    | -0.6653    | -0.2334    |
| Eye color (gray)                                                       | -0.2449   | -0.7631    | -0.1373    |
| Eye color (gray green)                                                 | -0.0043   | -0.6758    | -0.1471    |
| Eye color (green)                                                      | 0.0577    | -0.5569    | -0.1599    |
| Eye color (light brown)                                                | 0.016     | -0.6324    | -0.2403    |
| Eye color (medium brown)                                               | 0.0337    | -0.6953    | -0.2208    |
| Eye color (dark brown black)                                           | 0.0459    | -0.7094    | -0.2809    |
| Presence of large moles (no)                                           | -0.0426   | -0.6627    | -0.2921    |
| Presence of large moles (yes)                                          | 0.1298    | -0.5428    | -0.0032    |
| Moles in your right arm (less than 3)                                  | 0.0356    | -0.5682    | -0.3243    |
| Moles in your right arm (3 to 6)                                       | -0.0349   | -0.6706    | -0.1917    |
| Moles in your right arm (7 to 11)                                      | -0.0273   | -0.6933    | -0.0075    |
| Moles in your right arm (12 to 18)                                     | -0.0798   | -0.7987    | 0.1114     |
| Moles in your right arm (19 to 28)                                     | 0.0586    | -0.7178    | 0.1289     |
| Moles in your right arm (29 to 39)                                     | -0.0735   | -0.7839    | 0.1842     |
| Moles in your right arm (more than 39)                                 | 0.0894    | -0.743     | 0.4471     |
| Childhood latitude                                                     | -0.011    | -0.0138    | -0.0121    |
| Sun hair lightening (very much)                                        | 0.0345    | -0.5842    | -0.1591    |
| Sun hair lightening (somewhat)                                         | -0.0168   | -0.6795    | -0.2777    |
| Sun hair lightening (a little bit)                                     | -0.01     | -0.6428    | -0.1978    |
| Sun hair lightening (unchanged)                                        | 0.0553    | -0.5722    | -0.155     |
| Skin response to sun exposure without sun protection (painful blister) | -0.0592   | -0.6879    | -0.2536    |
| Skin response to sun exposure without sun protection (blister)         | -0.0455   | -0.7017    | -0.1809    |
| Skin response to sun exposure without sun protection (burns sometimes) | 0.0457    | -0.5899    | -0.1929    |
| Skin response to sun exposure without sun protection (rarely burns)    | -0.01     | -0.6435    | -0.1917    |
| Skin response to sun exposure without sun protection (never burns)     | -0.2322   | -0.8985    | -0.1358    |
| Tanning bed (never)                                                    | -0.0222   | -0.667     | -0.2315    |
| Tanning bed (1-4times)                                                 | 0.0231    | -0.6267    | -0.181     |
| Tanning bed (5-10times)                                                | 0.0933    | -0.5919    | -0.2249    |
| Tanning bed (11-20times)                                               | 0.1239    | -0.542     | -0.1294    |
| Tanning bed (21-30times)                                               | 0.0438    | -0.5803    | -0.2345    |
| Tanning bed (30+times)                                                 | 0.0713    | -0.4373    | -0.0243    |
| Outdoor job (no)                                                       | -0.0058   | -0.641     | -0.2187    |
| Outdoor job (yes)                                                      | 0.0788    | -0.5643    | -0.1298    |
| Smoking (no)                                                           | 0.0468    | -0.6108    | -0.1744    |
| Smoking (yes)                                                          | -0.0363   | -0.6433    | -0.2349    |
| Adulthood elevation                                                    | 5.775e-05 | 2.366e-05  | -1.586e-05 |
| Morning person (night)                                                 | -0.0362   | -0.673     | -0.2205    |
| Morning person (morning)                                               | 0.0579    | -0.5791    | -0.1794    |
| Desk clean (very clean)                                                | 0.035     | -0.5659    | -0.0581    |
| Desk clean (fairly clean)                                              | 0.0482    | -0.5996    | -0.2033    |
| Desk clean (fairly messy)                                              | -0.0085   | -0.6453    | -0.2214    |
| Desk clean (very messy)                                                | -0.0514   | -0.6953    | -0.2704    |
| Seasonal allergies (no allergy)                                        | 0.0543    | -0.6346    | -0.1064    |
| Seasonal allergies (has seasonal allergy)                              | -0.024    | -0.6147    | -0.2817    |

Supplementary Figure 1: Maps of BCC, SCC, and melanoma distributions in USA. The maps combined all data (training and validation sets) from 23andMe skin cancer cohorts. a) map for BCC, b) map for SCC, and c) map for melanoma

a) BCC

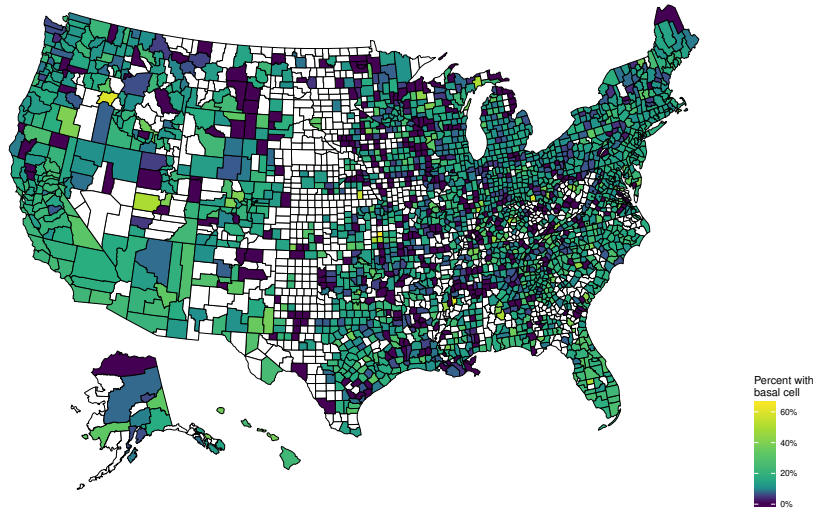

b) SCC

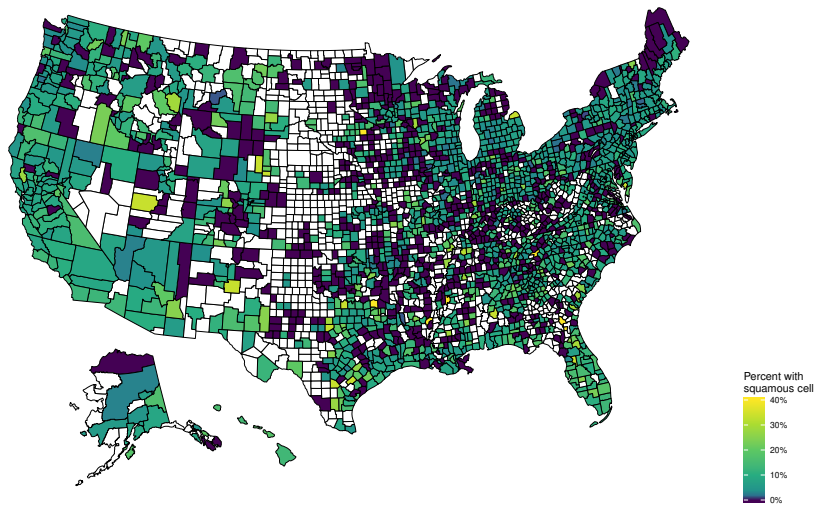

c) Melanoma

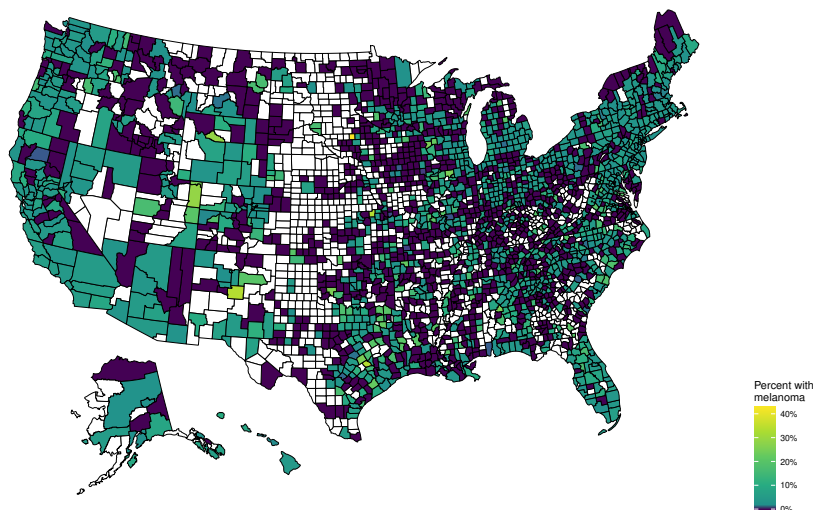



Supplementary Figure 2: Deviance explained from GLMs described in a) Supplementary Table 4 and b) Supplementary Table 8.

Stars indicate additional risk factors identified in 23andMe database.

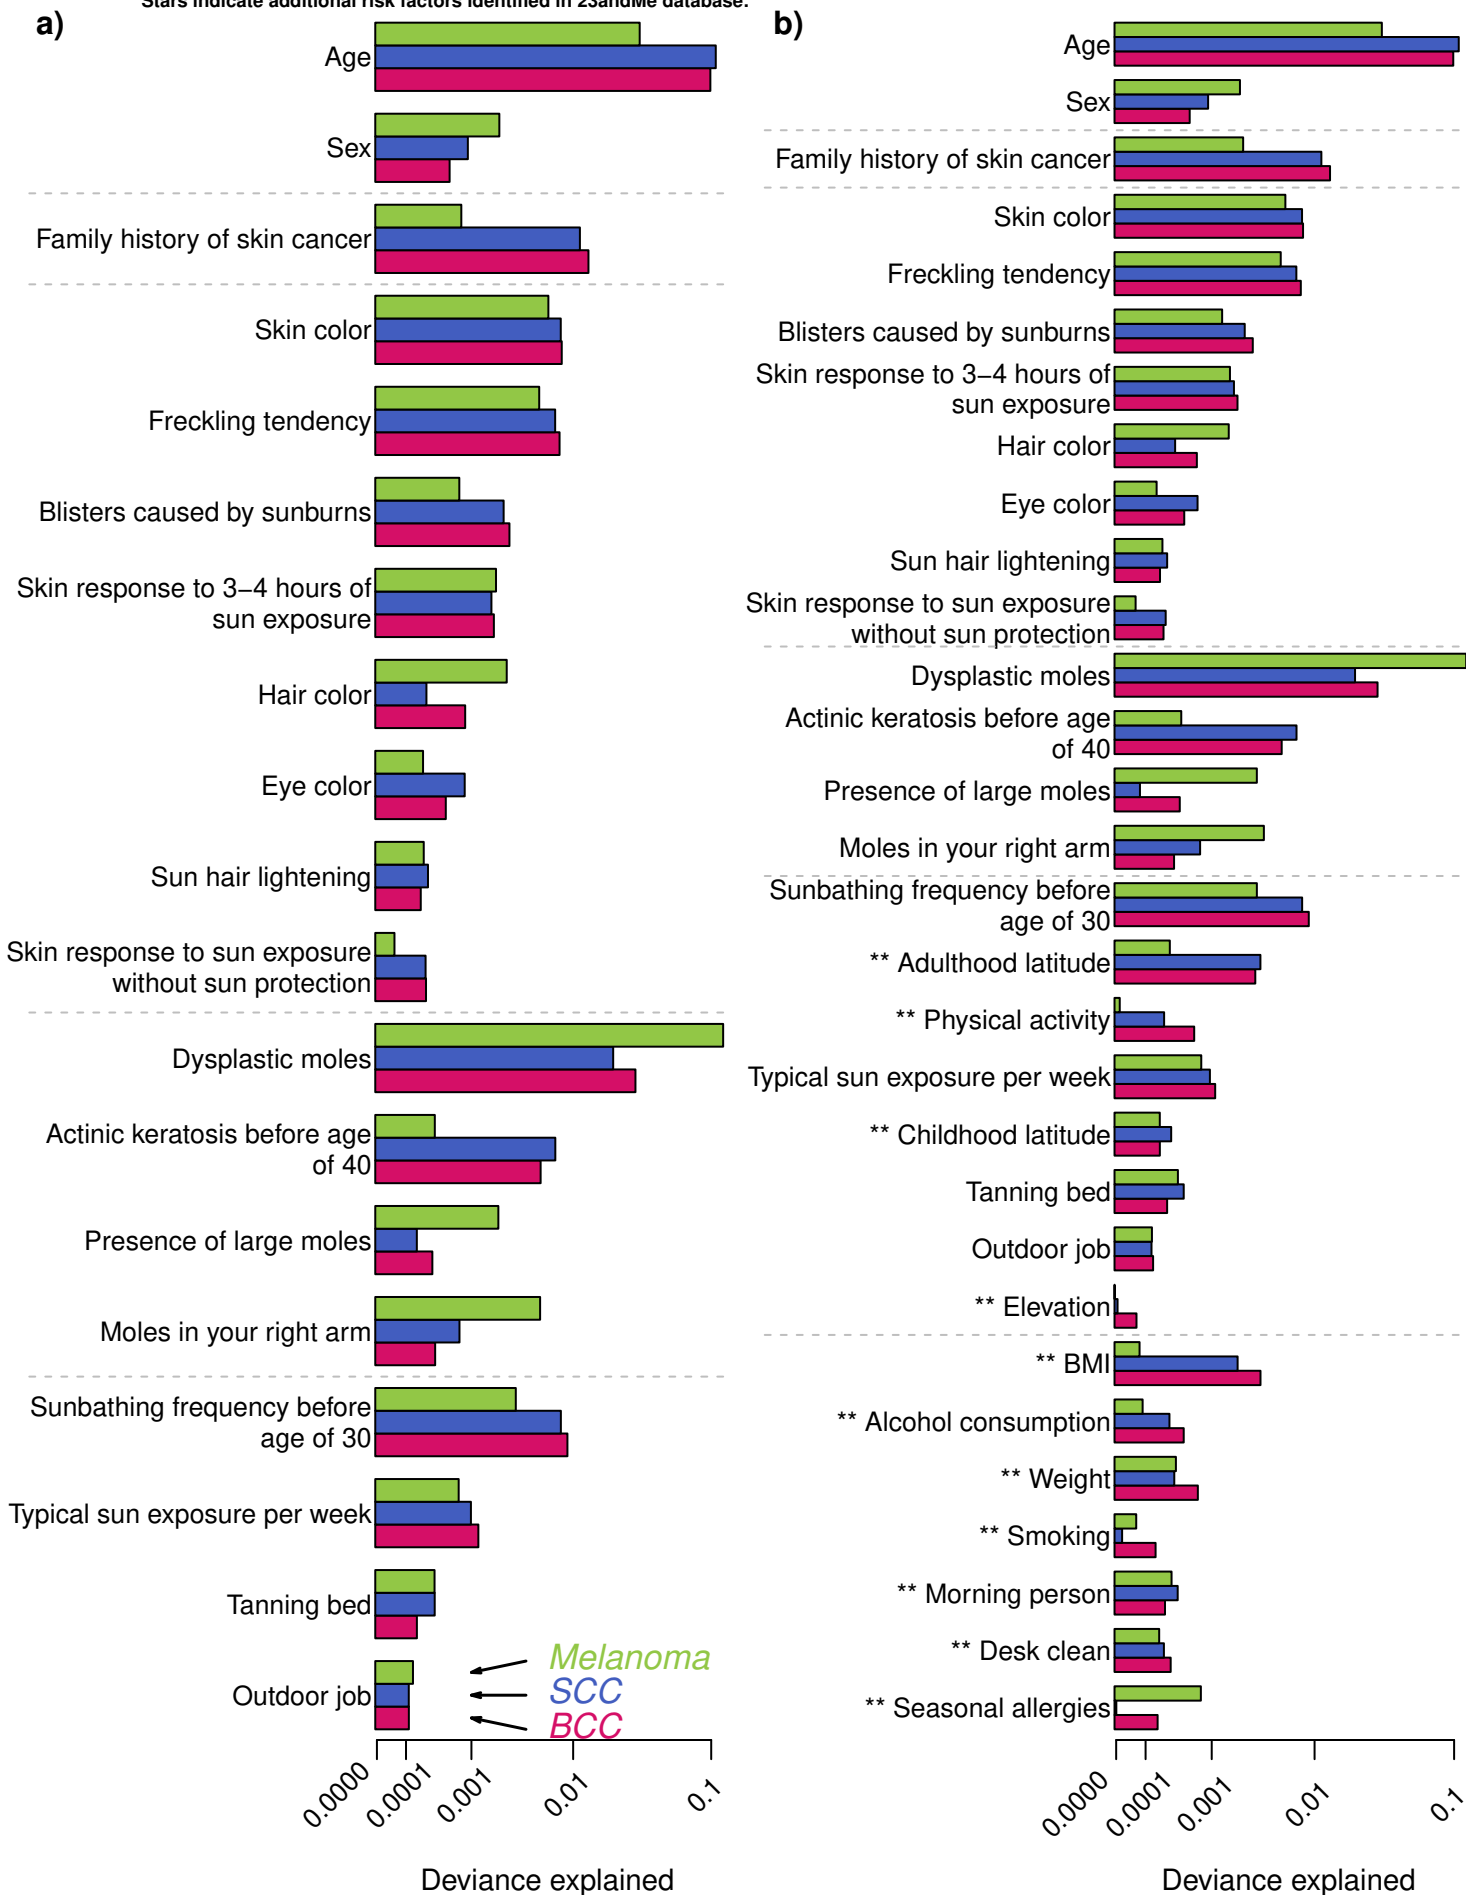

**Supplementary Figure 3: Deviance explained from GLMs described in a) Supplementary Table 5 (no missing phenotype imputation) and b) Supplementary Table 6 (age matching)**

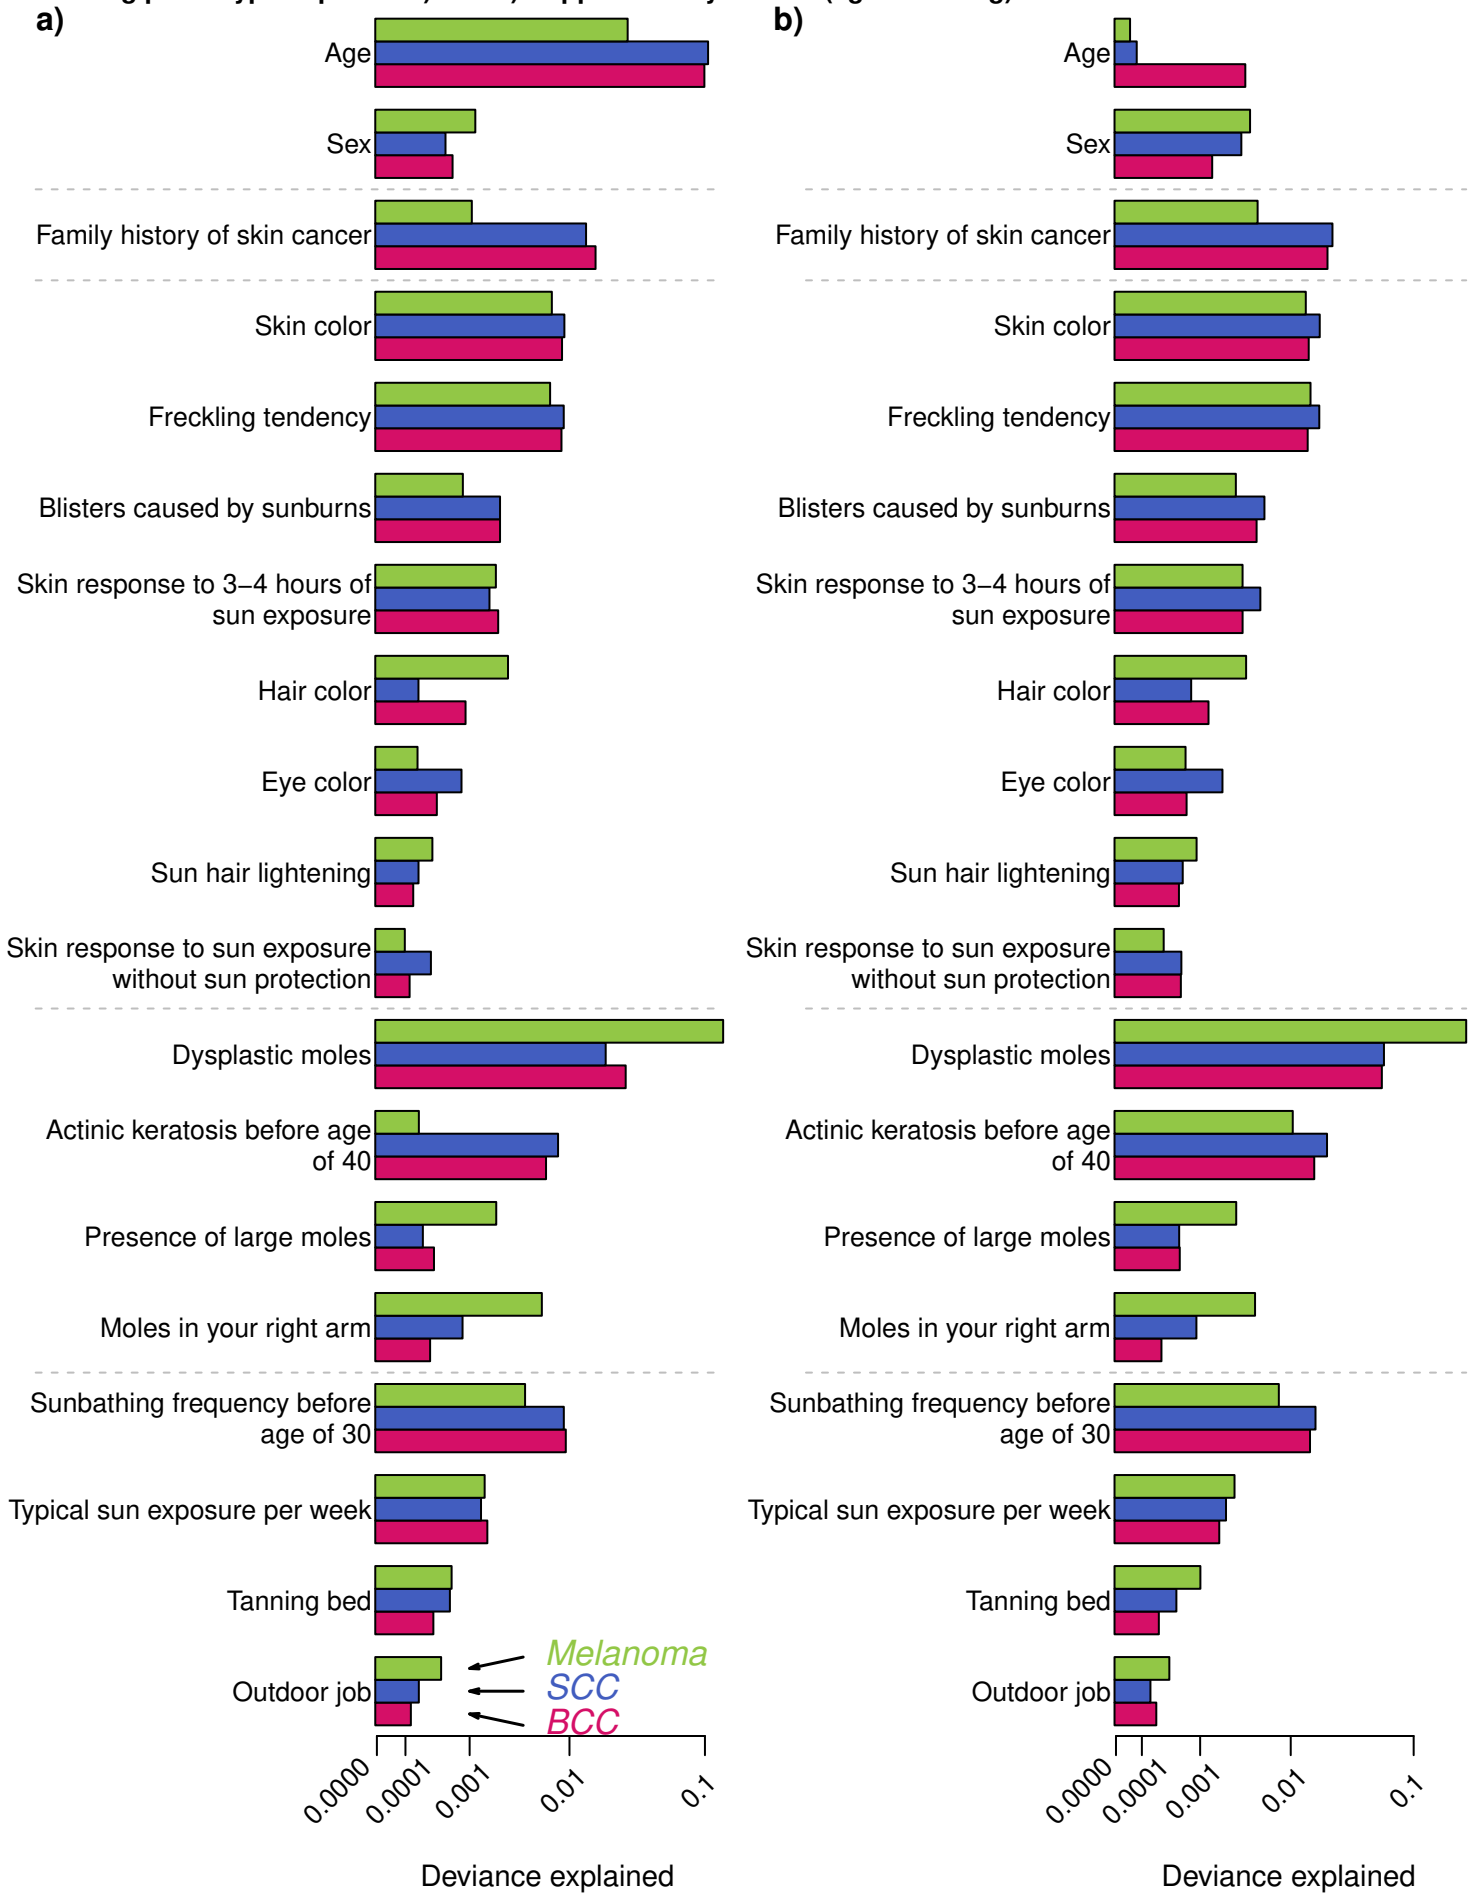

# Supplementary Figure 4: Cluster analysis of additional risk factors identified in 23andMe database.

A total 608 phenotypes from 23andMe database were tested. We selected additional risk factors with P-value < 1e-8 criteria and clustered them using ClustOfVar library in R. The aggregation criterion is the decrease in homogeneity for the cluster being merged. The homogeneity of a cluster is the sum of the correlation ratio (for qualitative variables) and the squared correlation (for quantitative variables) between the variables and the center of the cluster which is the first principal component of PCAmix. PCAmix is defined for a mixture of qualitative and quantitative variables and includes ordinary principal component analysis (PCA) and multiple correspondence analysis (MCA) as special cases.

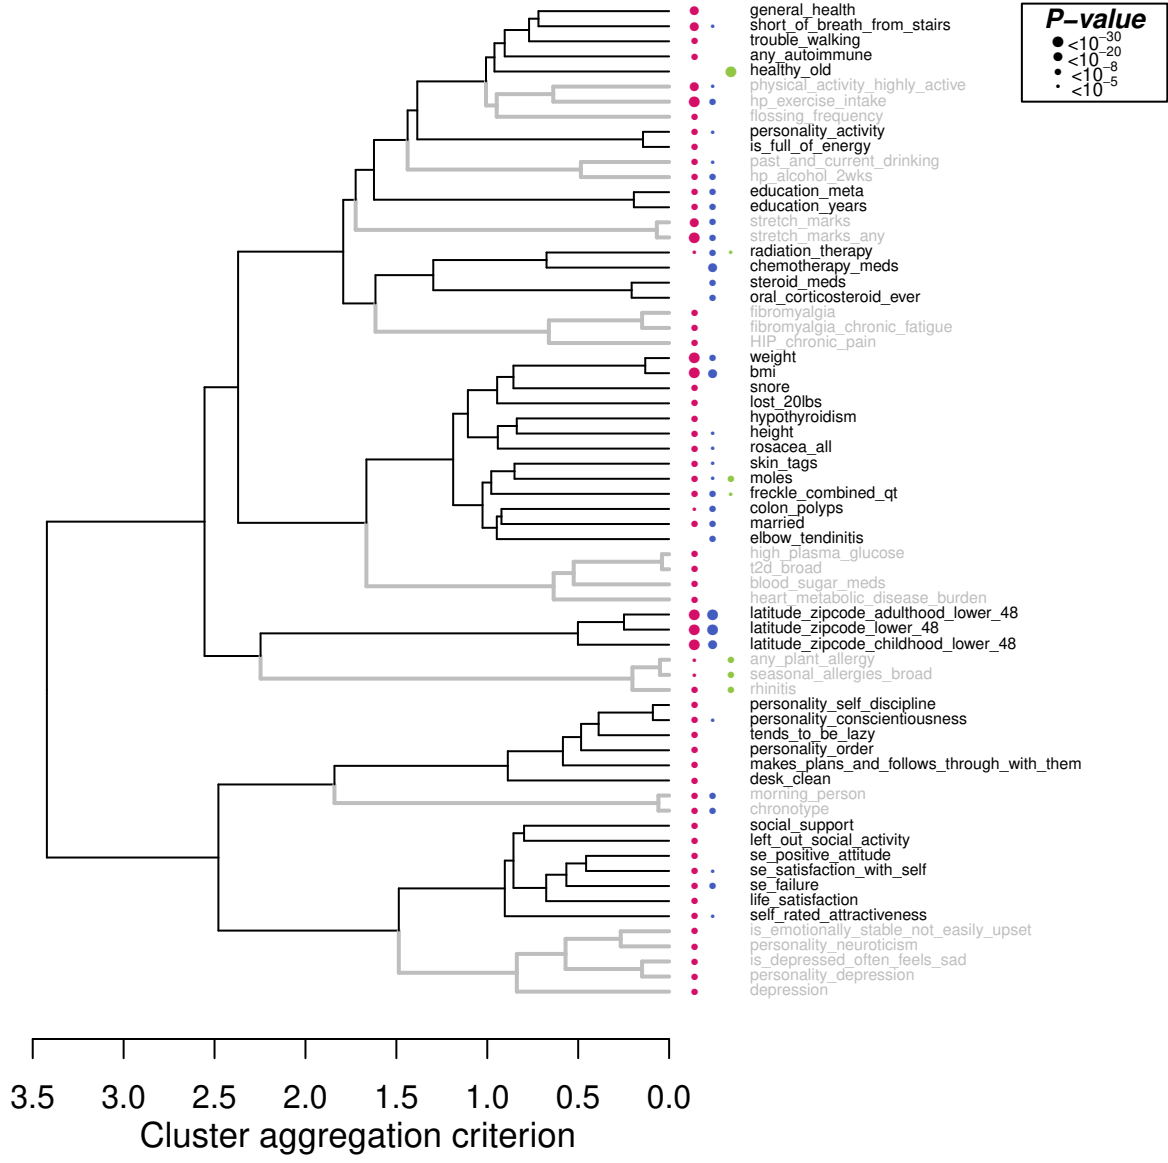

**Supplementary Figure 5: Manhattan plots of each skin cancer GWAS (performed on the training set).**

**a) BCC GWAS, b) SCC GWAS, and c) melanoma GWAS.**

a) BCC

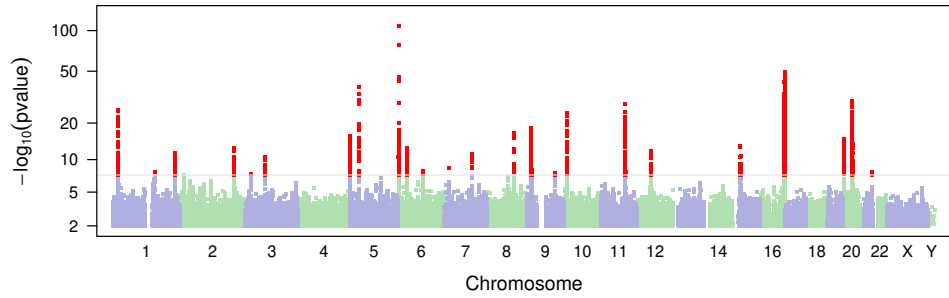

b) SCC

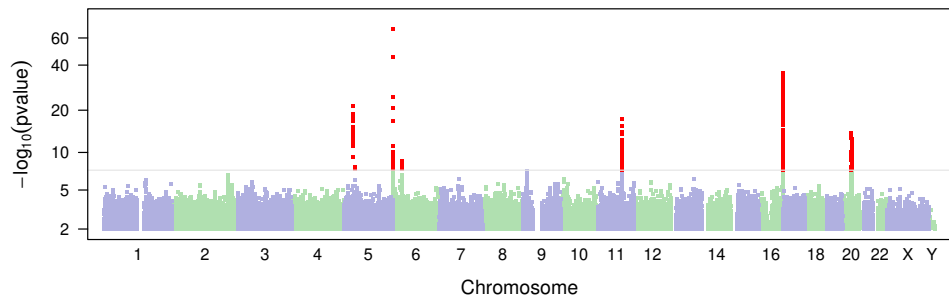

c) Melanoma

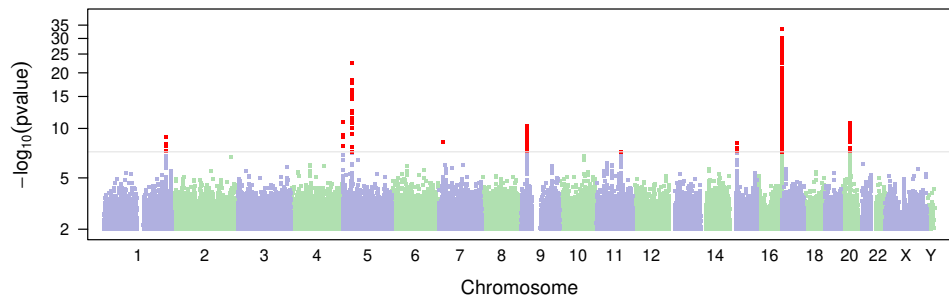

## Supplementary Figure 6: Risk score performances in training and validation sets

a) and b) ROC (+ AUC) and precision–recall curves for the Disease Risk Score (DRS) in the training and validation sets. c), d) and e) are AUCs in the validation set for BCC, SCC, and melanoma, respectively. AUC for DRS, age, PRS, and Exposure risk score are shown. f), g) and h) are AUCs in the validation set across the participants age.

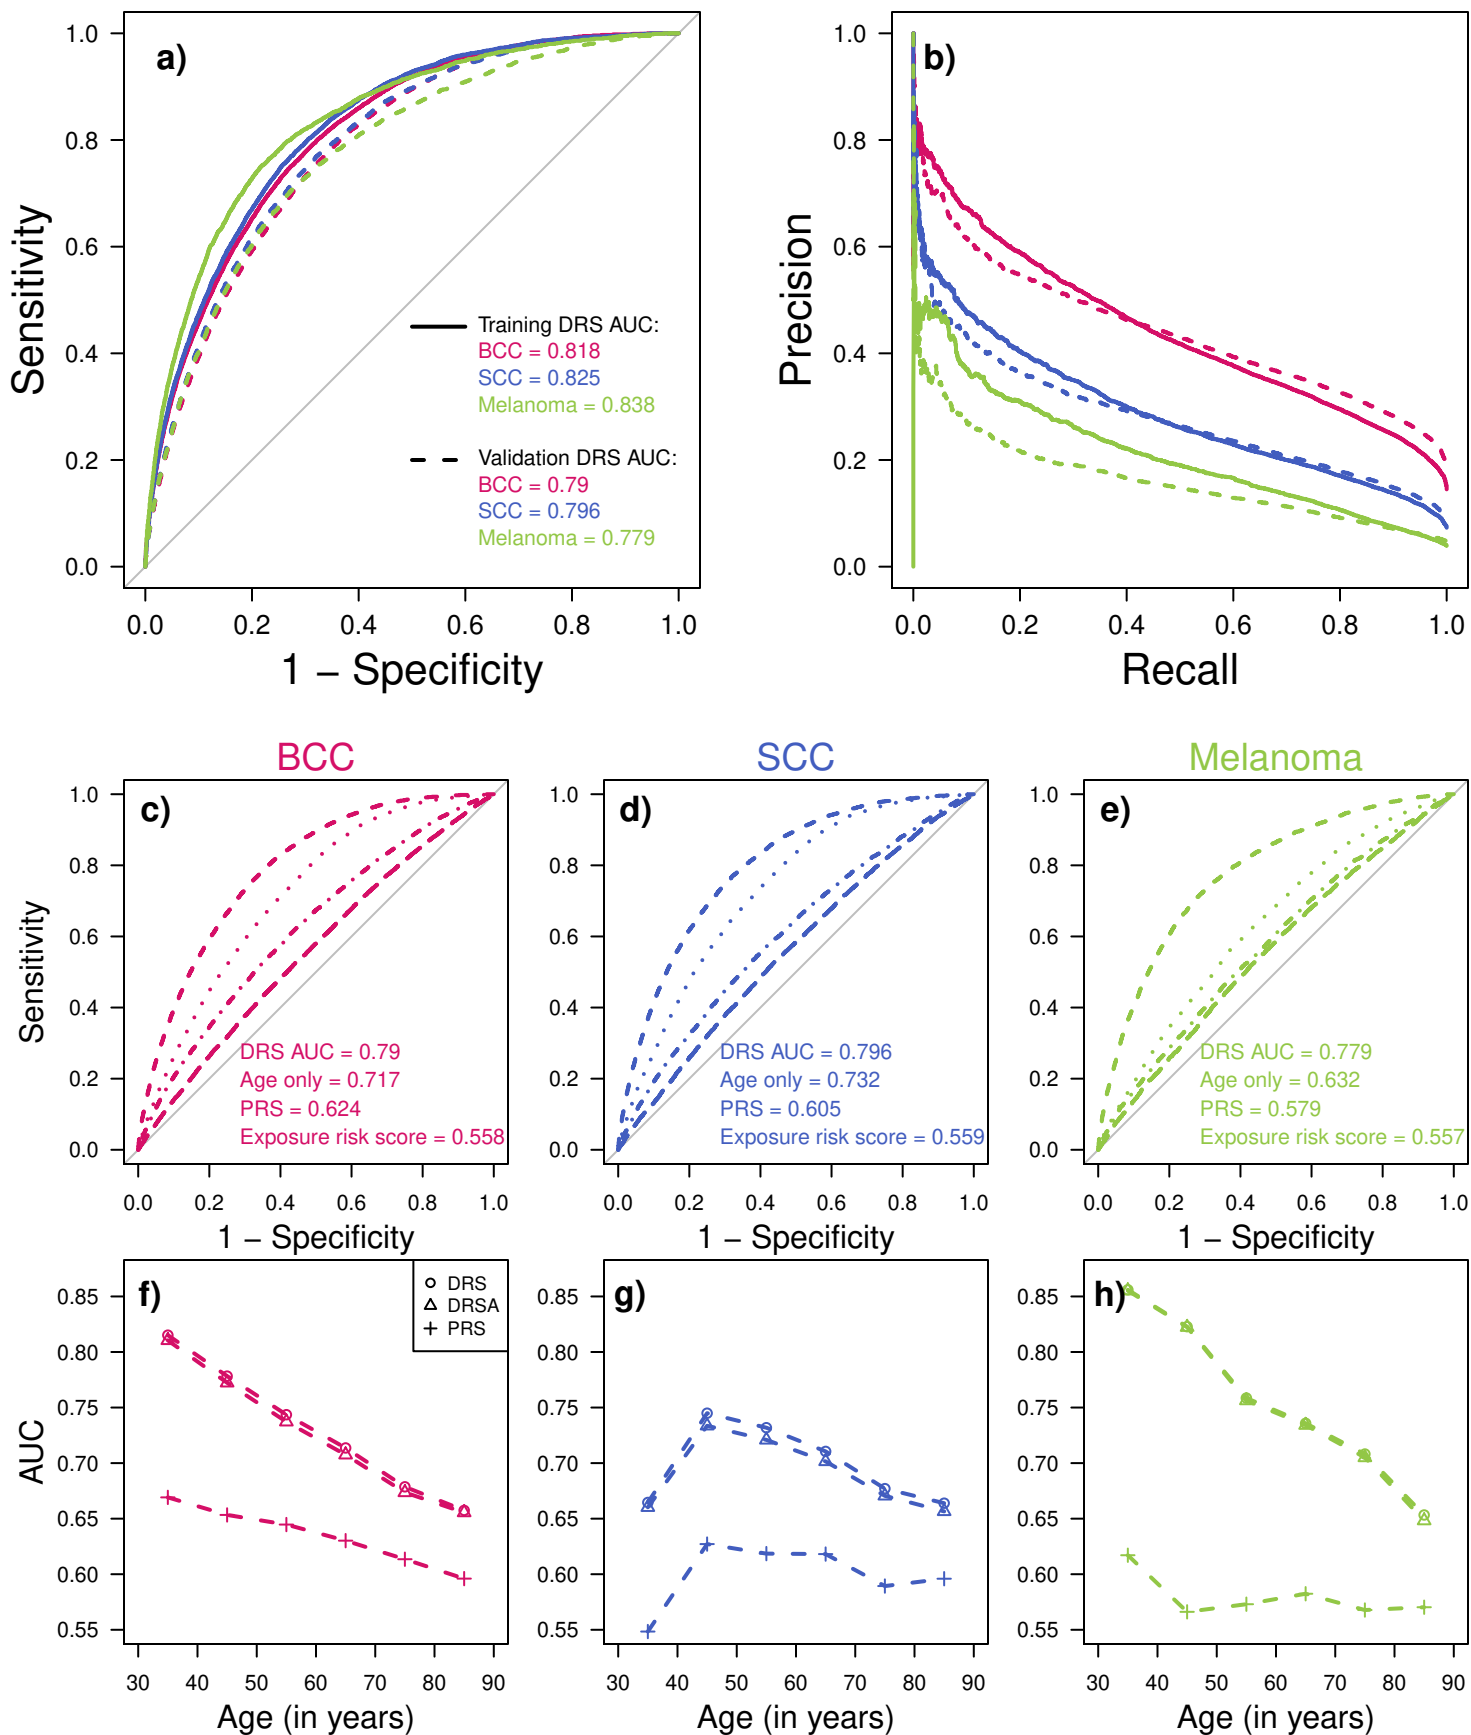

**Supplementary Figure 7: Prevalence of skin cancer cases across the Demographic, Exposure, Susceptibility, and Mole risk score distributions in the validation set.**

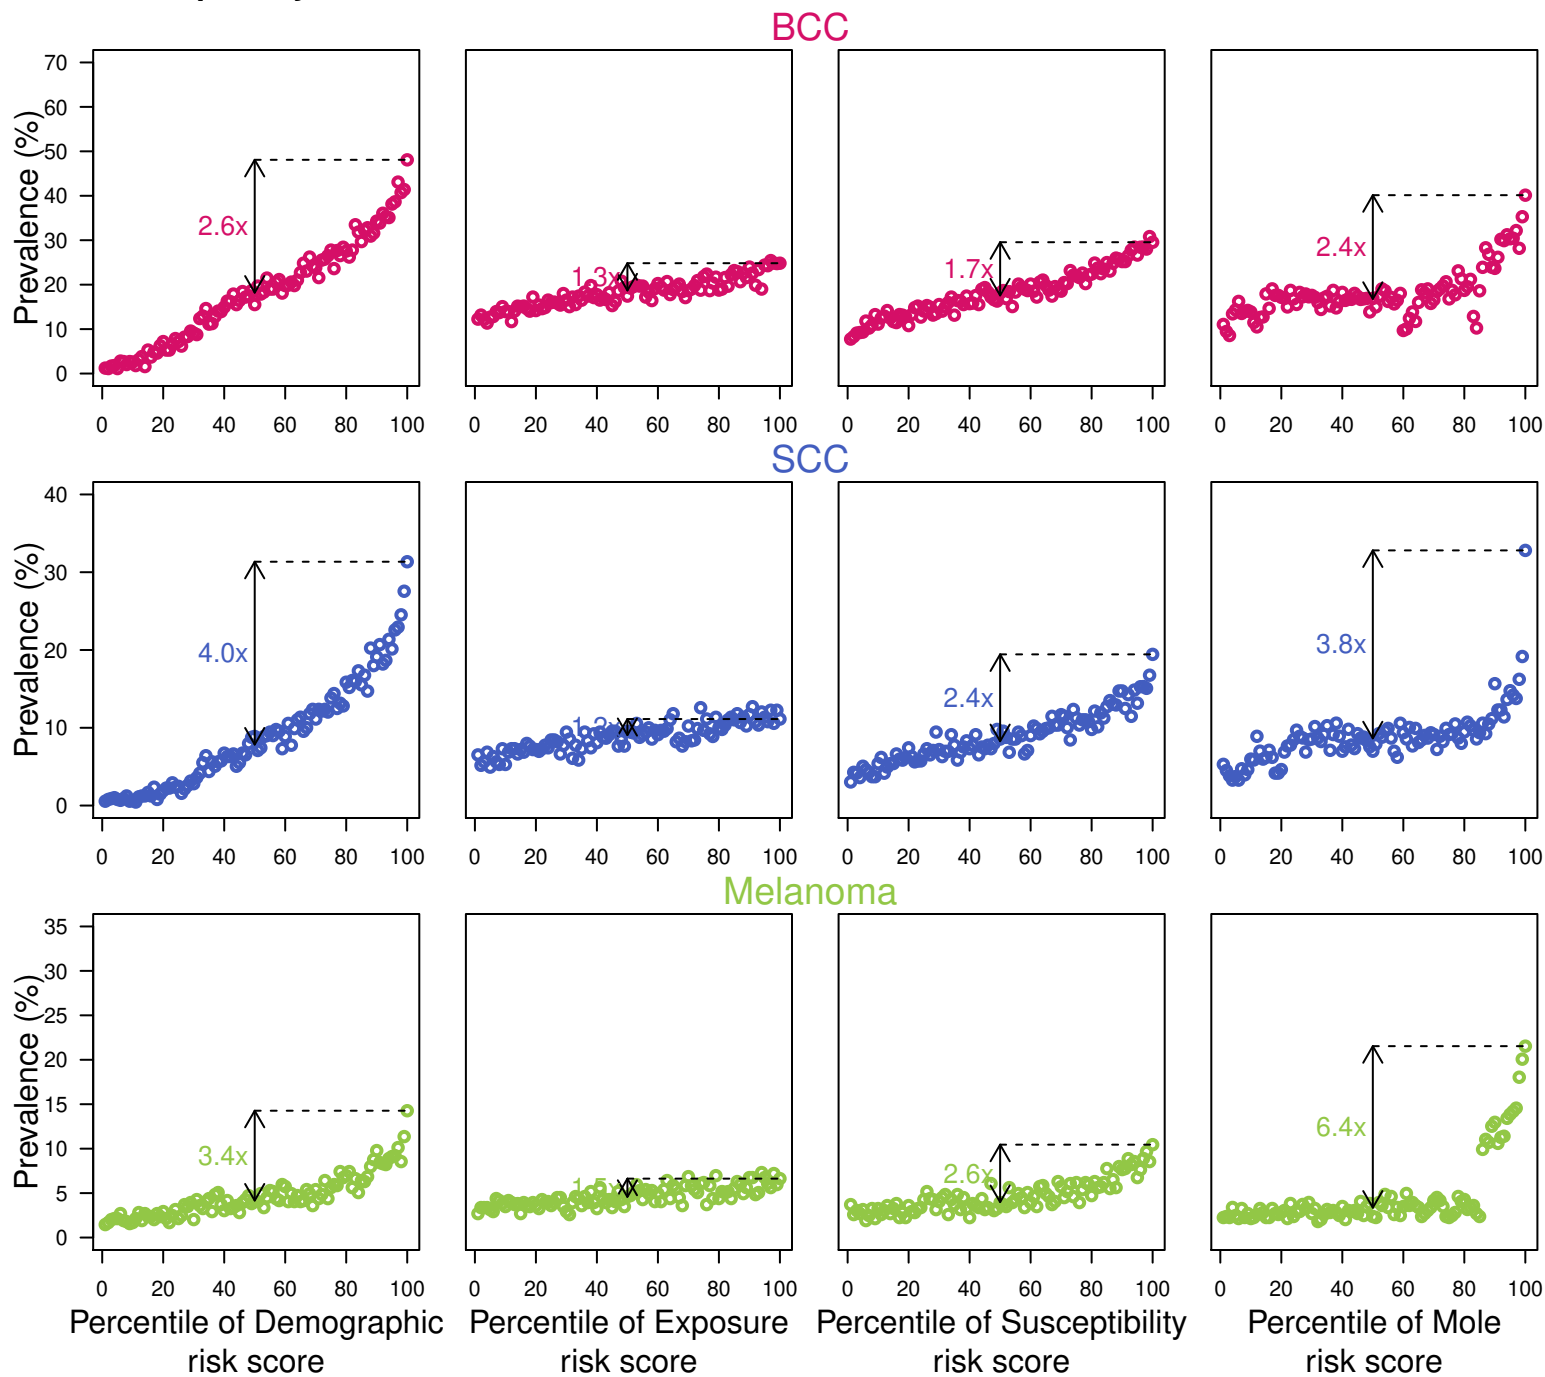

**Supplementary Figure 8: DRS, DRSA and PRS distributions across the participant age at baseline in the validation set (103,008 participants, including 14,898 BCC, 7,479 SCC, and 3,998 melanoma cases).** Mean (dots) and SD (bars) of risk scores by age. The black area is the 95% confidence interval from linear models, with age modeled as polynomial.

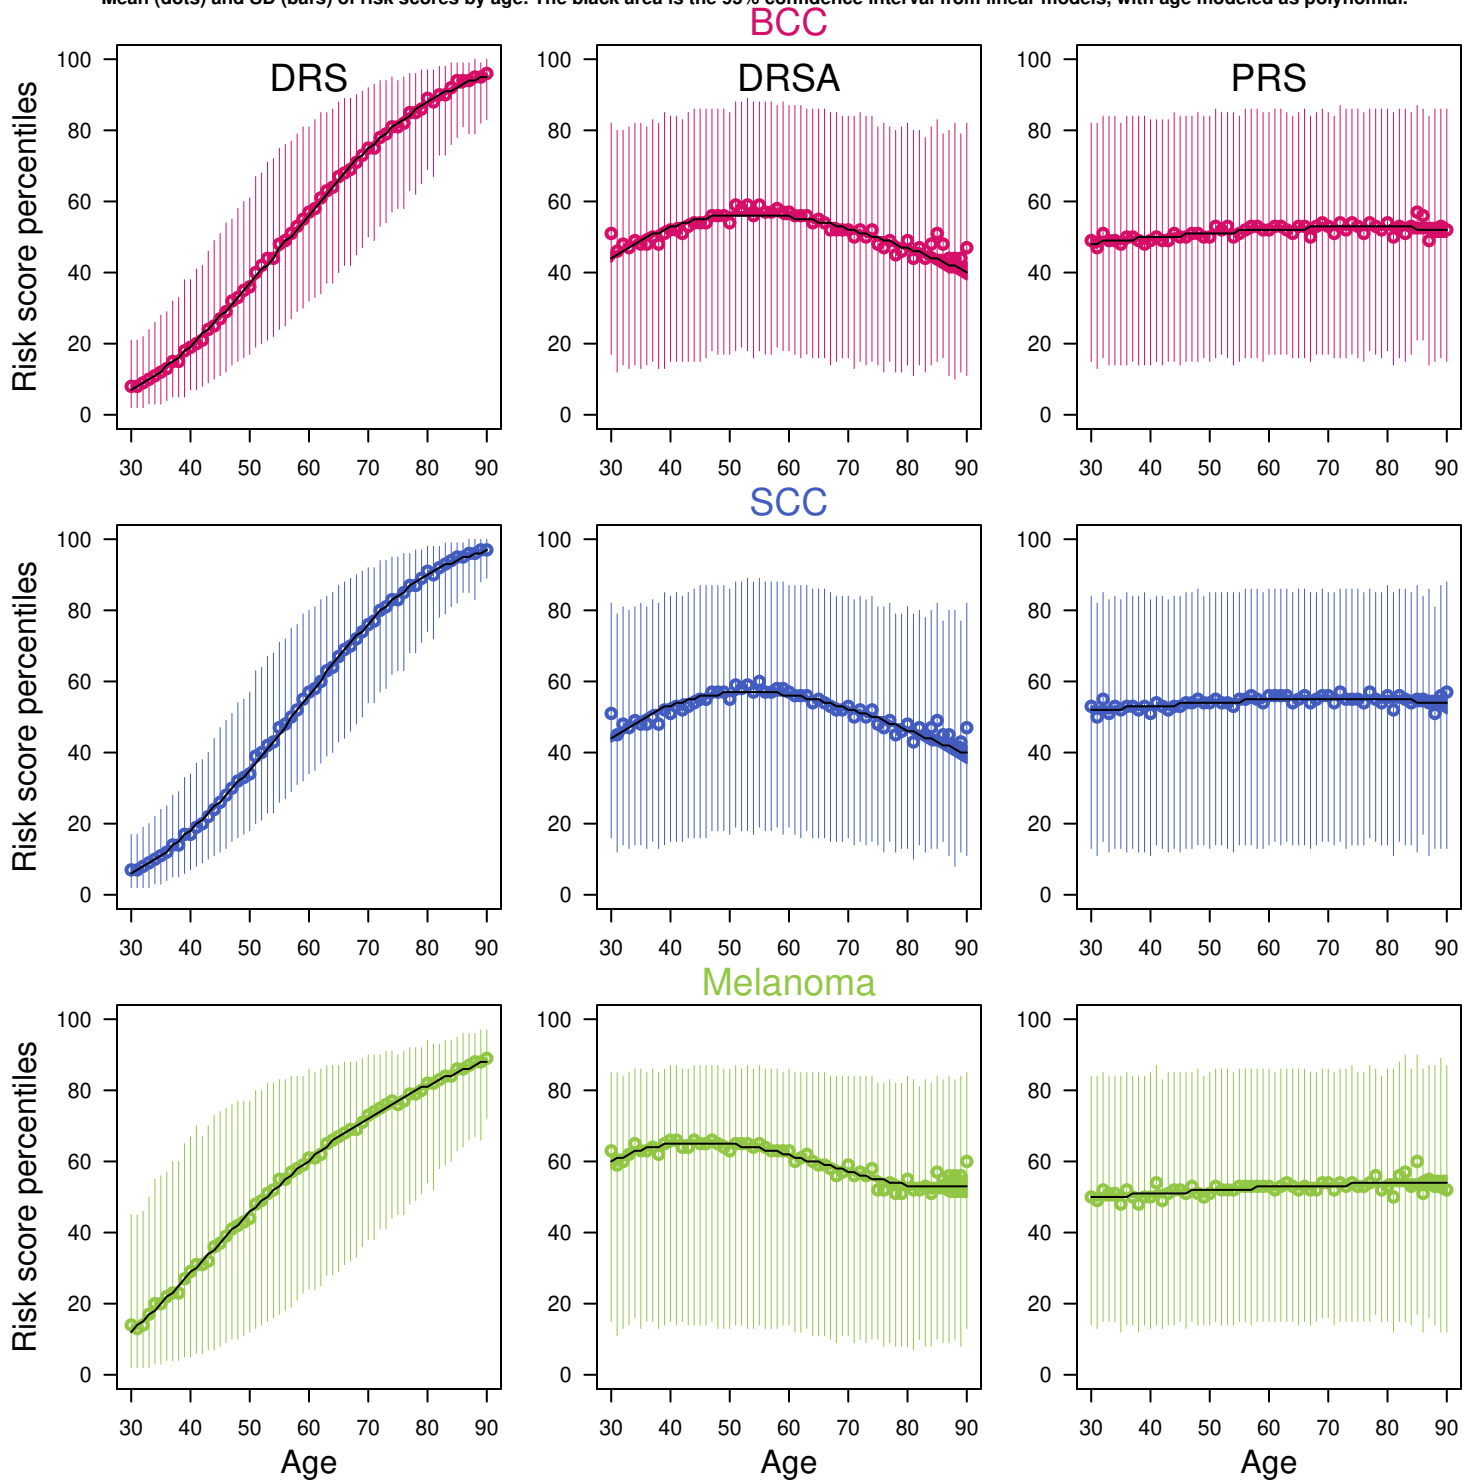

**Supplementary Figure 9: Principal component analysis on PRS, Exposure, Susceptibility, Mole, Family, and Miscellaneous risk scores.**

Right panel: all participants; Middle panel: skin cancer cases; Left panels: variance explained and legends of right and middle panels.

*BCC:*

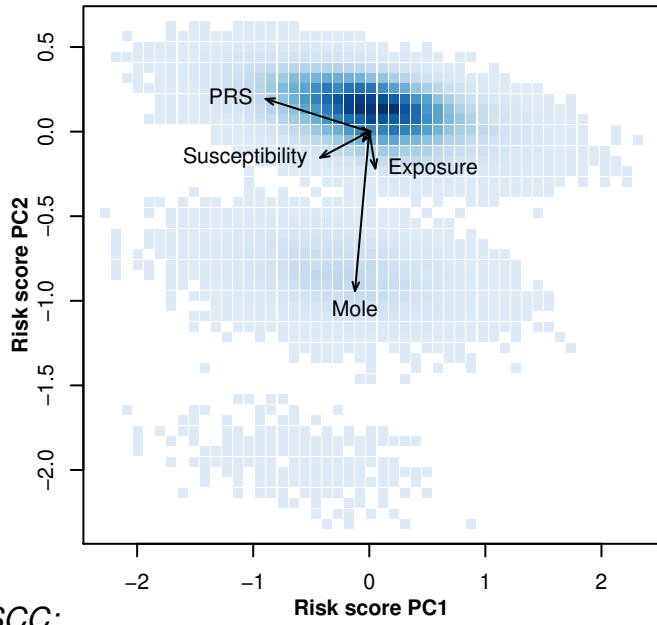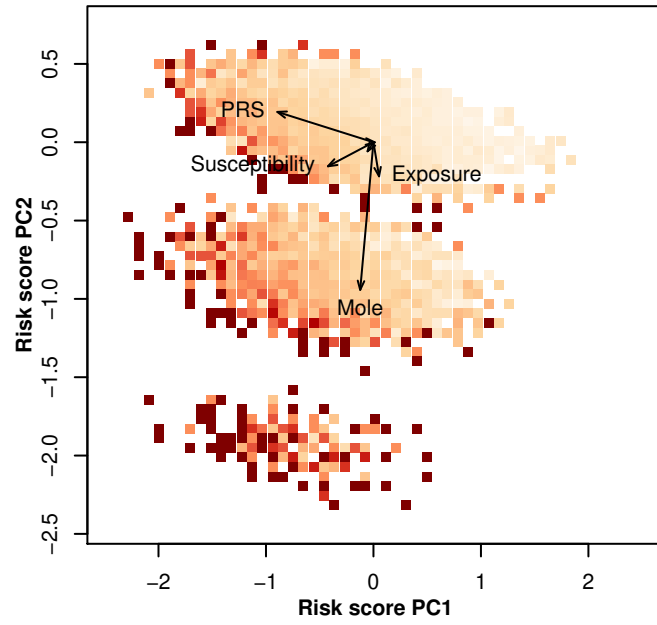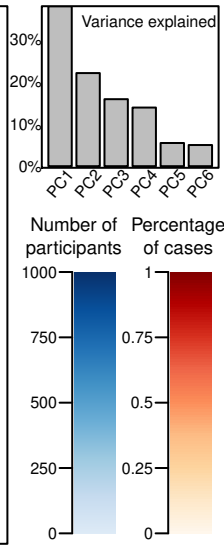

*SCC:*

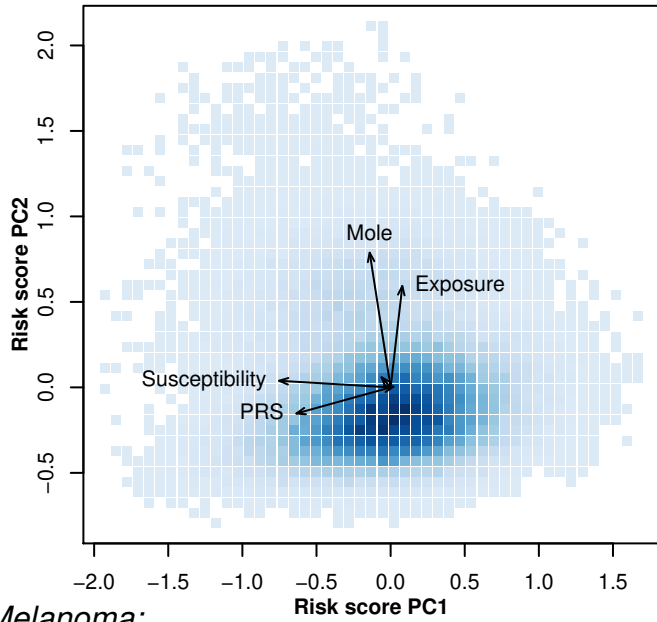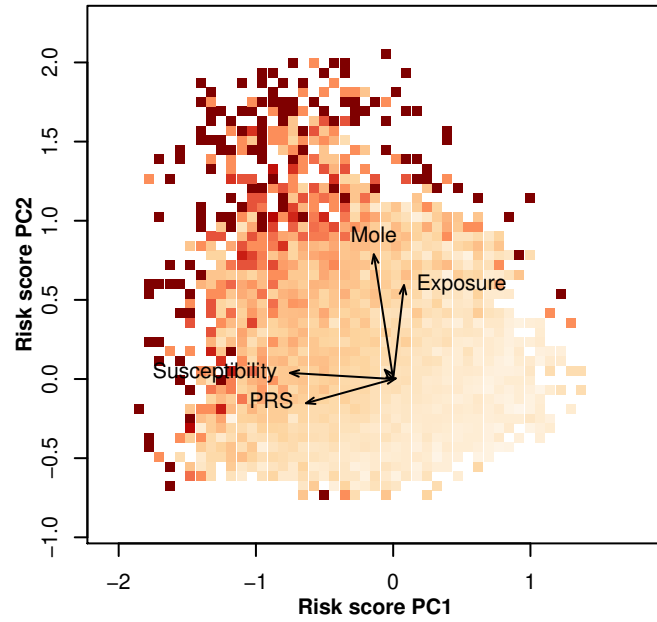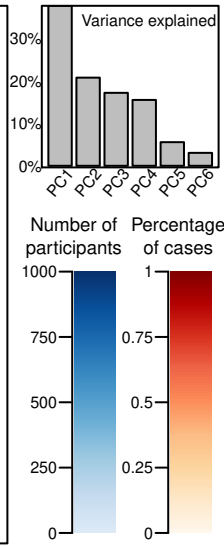

*Melanoma:*

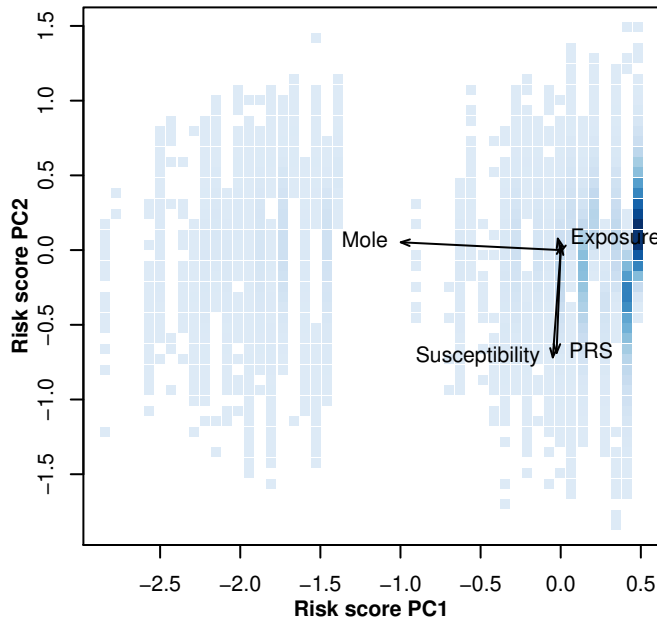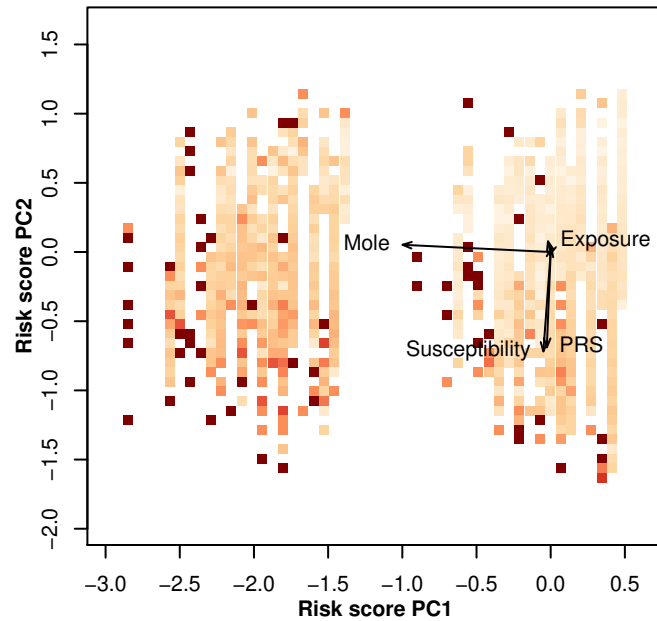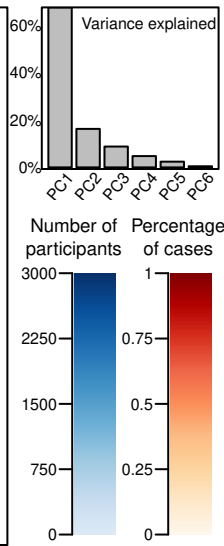



Supplementary Figure 10: Mean age (and 95% CI) of skin cancer diagnosis across the Demographic, Exposure, Susceptibility, and Mole risk score distributions in the validation set (103,008 participants, including 14,898 BCC, 7,479 SCC, and 3,998 melanoma cases).

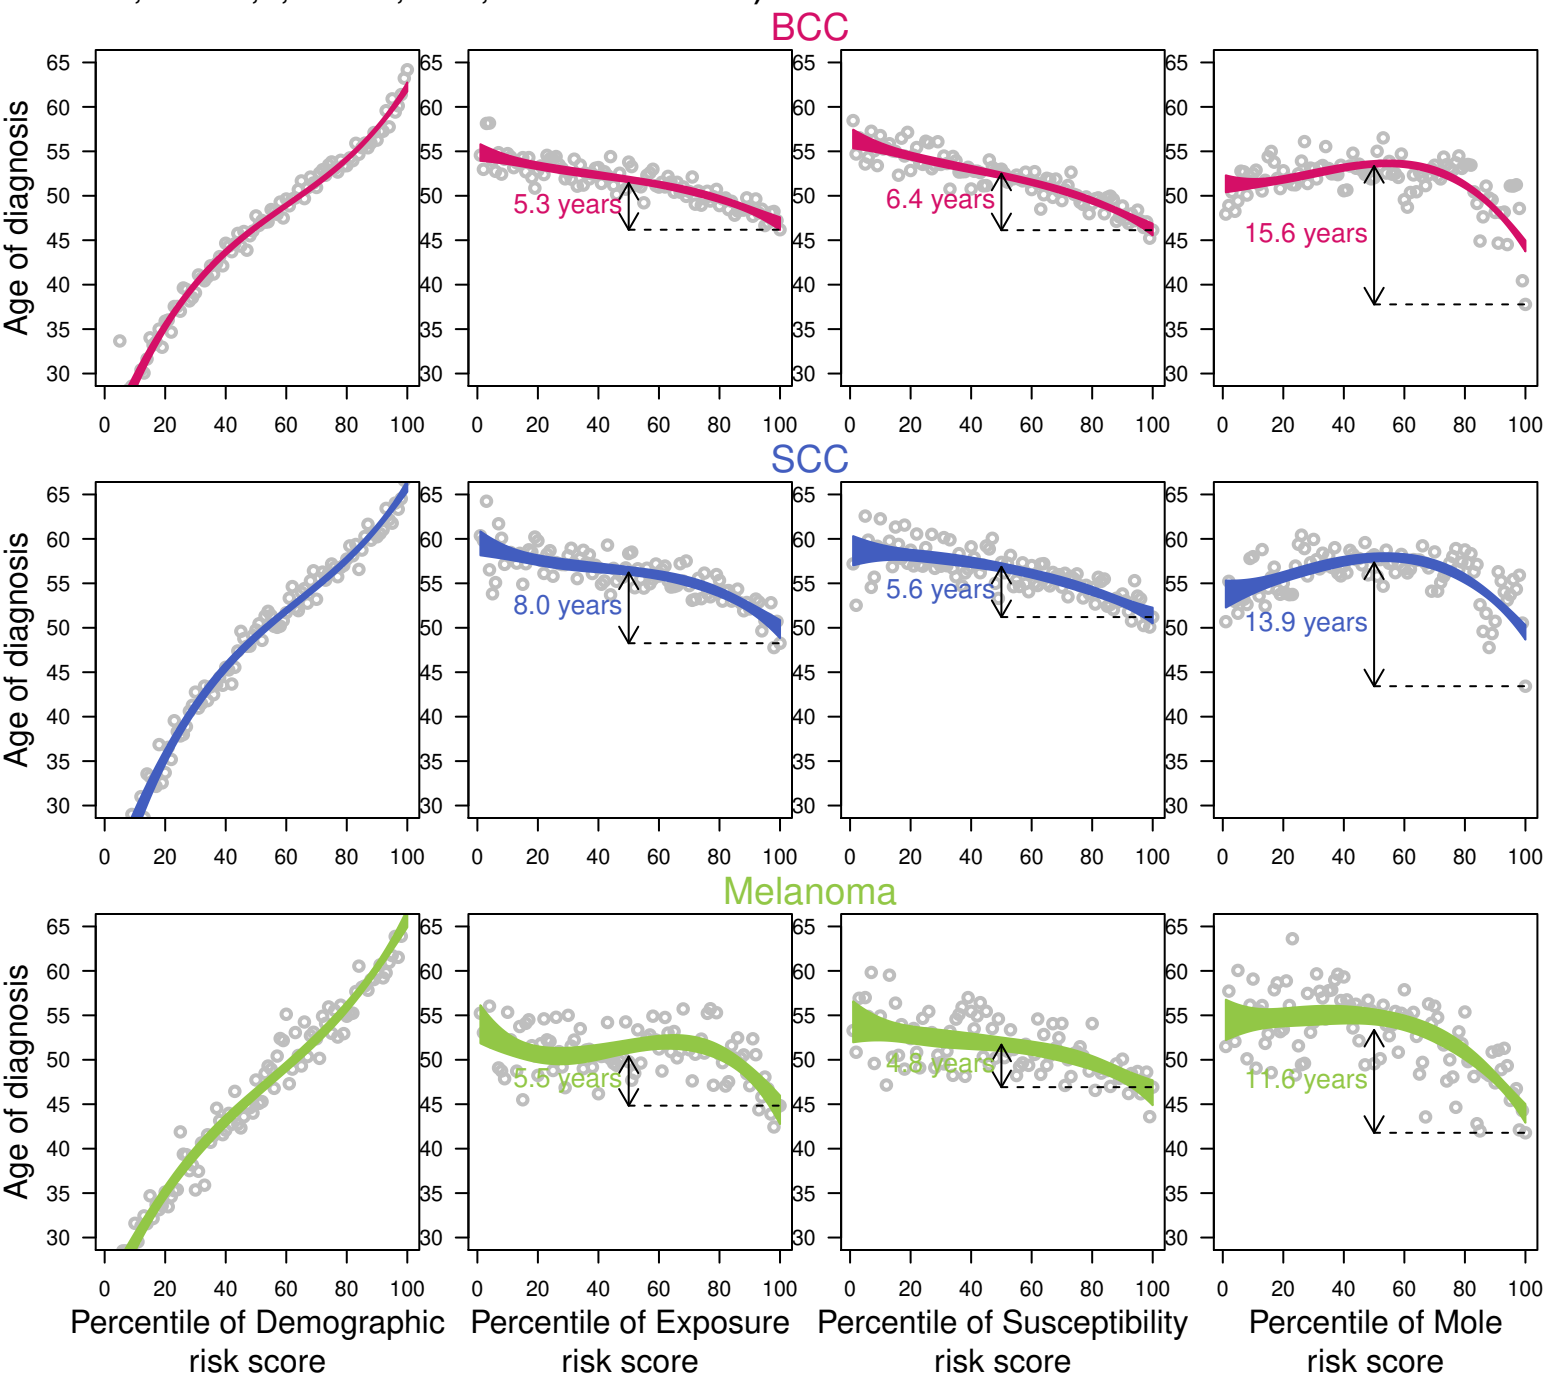

# Supplementary Figure 11: Incident skin cancer cases in the validation set, from 2018 and 2019 followup survey.

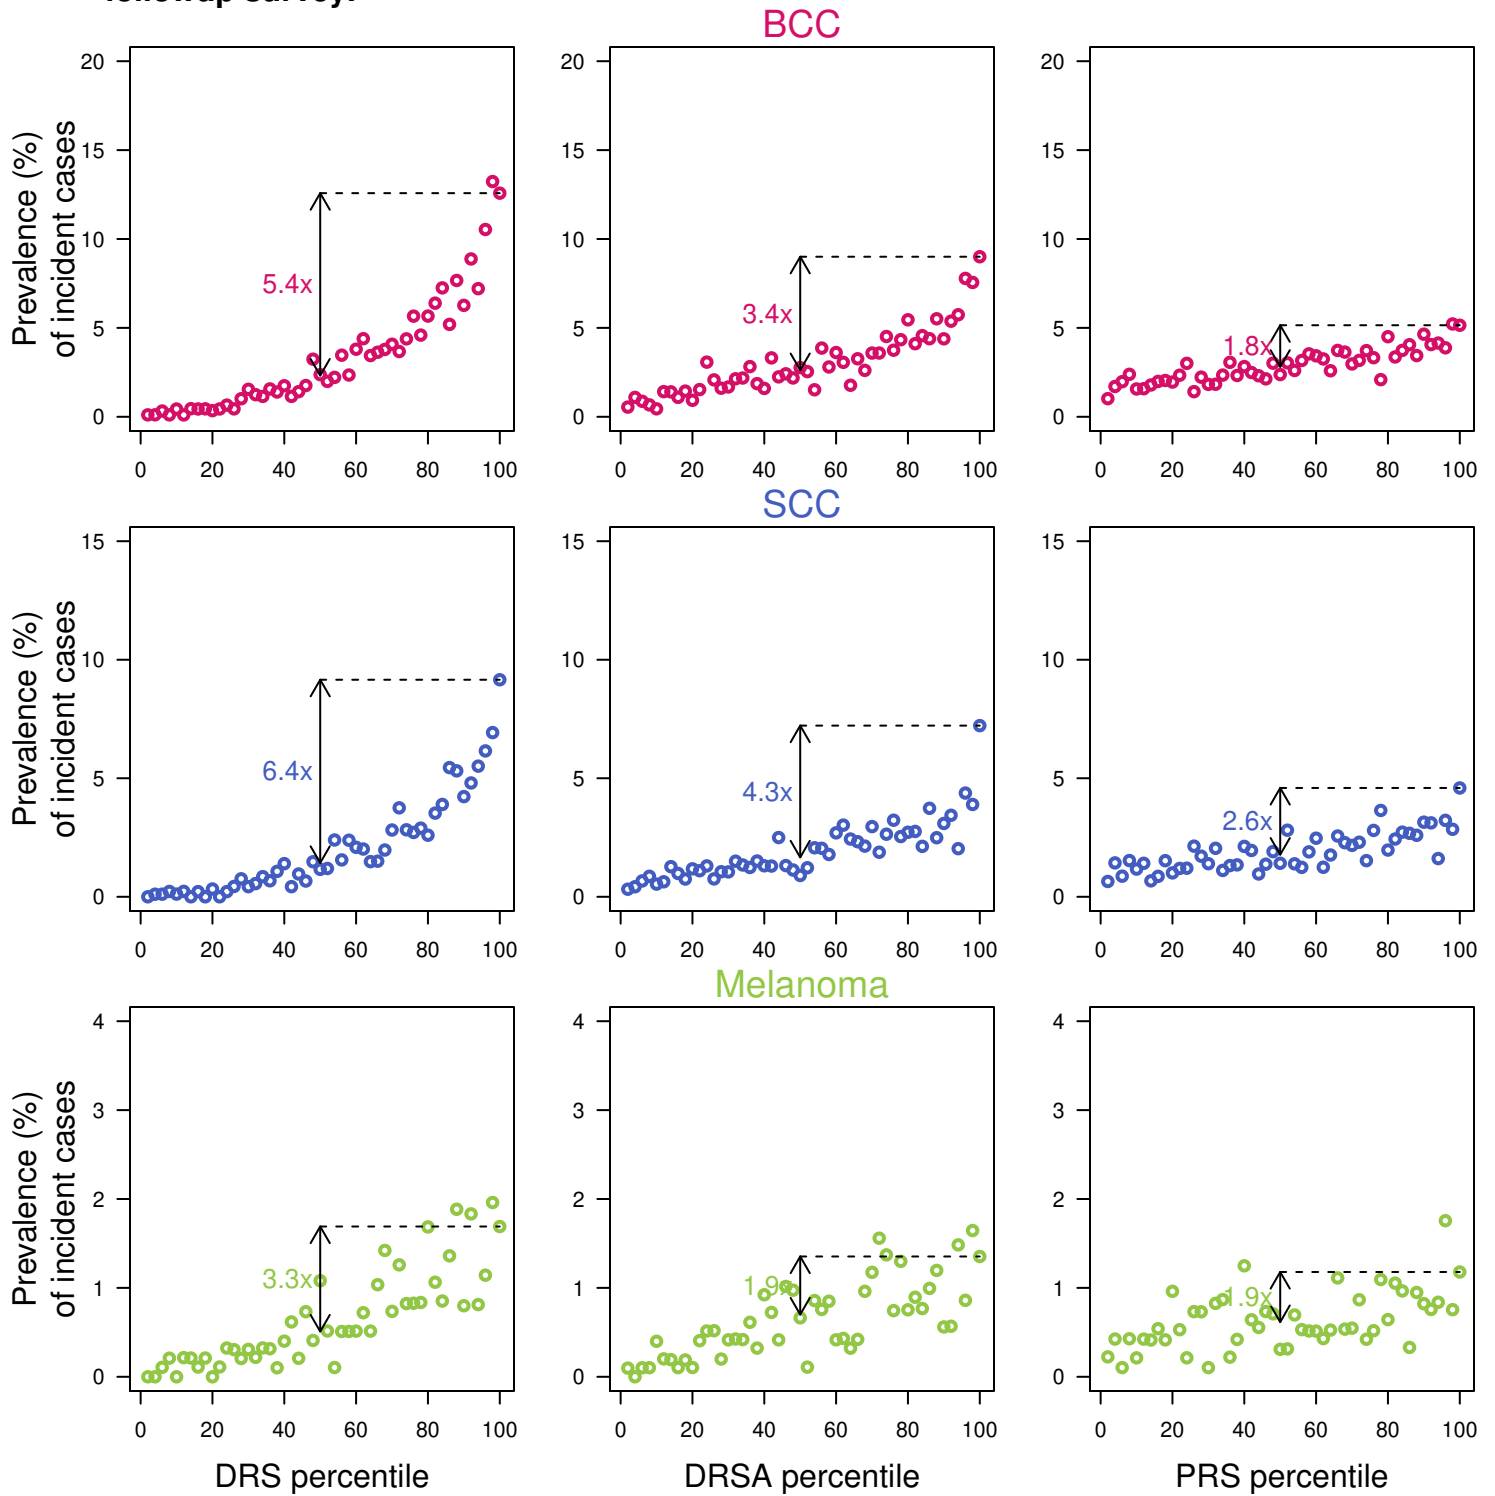

Supplementary Figure 12: Cancer free in the validation set, from 2018 and 2019 followup survey.

BCC

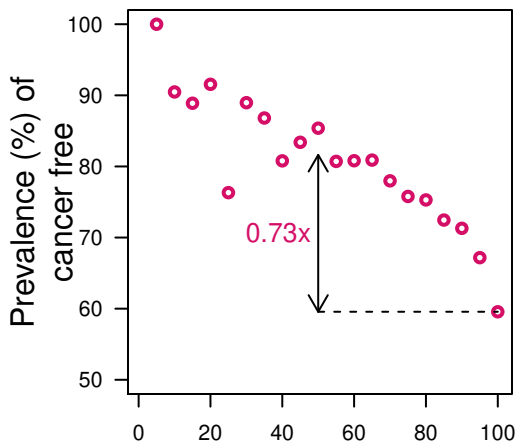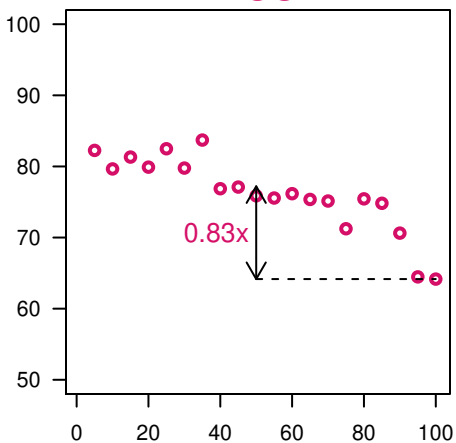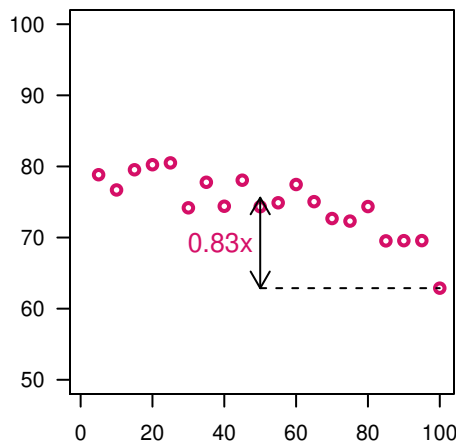

SCC

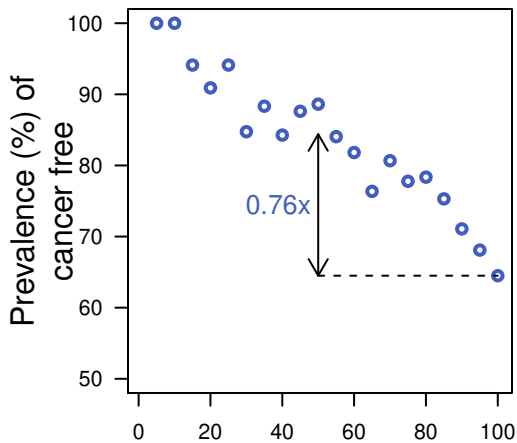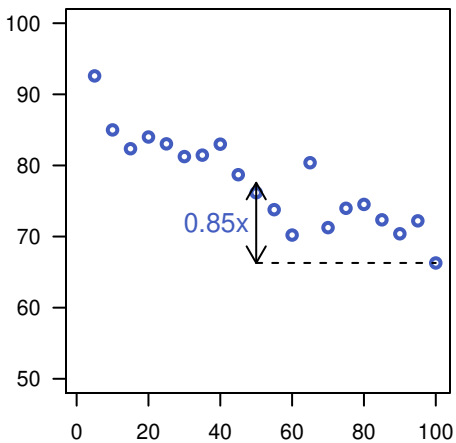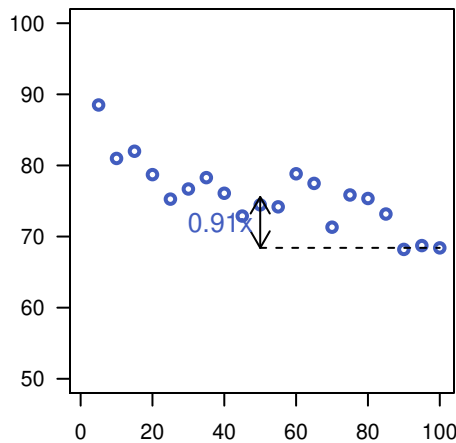

Melanoma

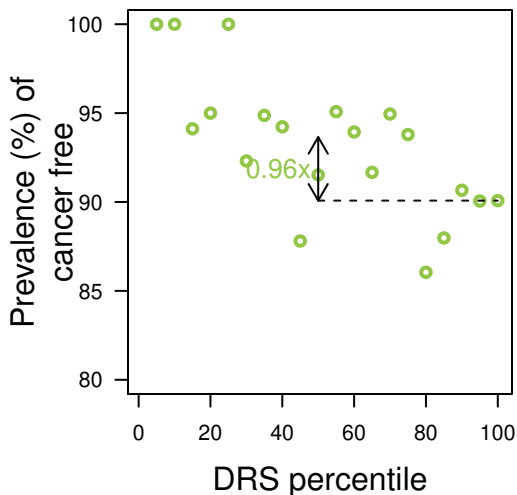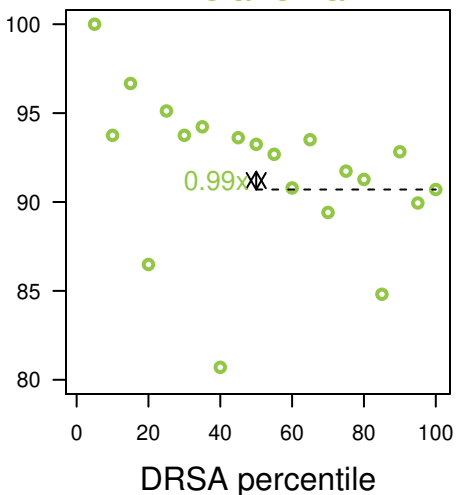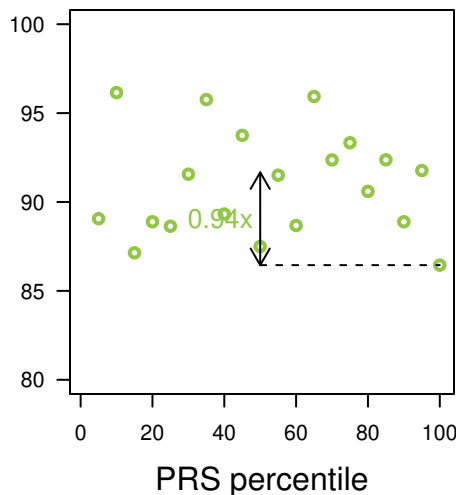

**Supplementary Figure 13: Deviance explained in prediction models with pairwise interaction.**

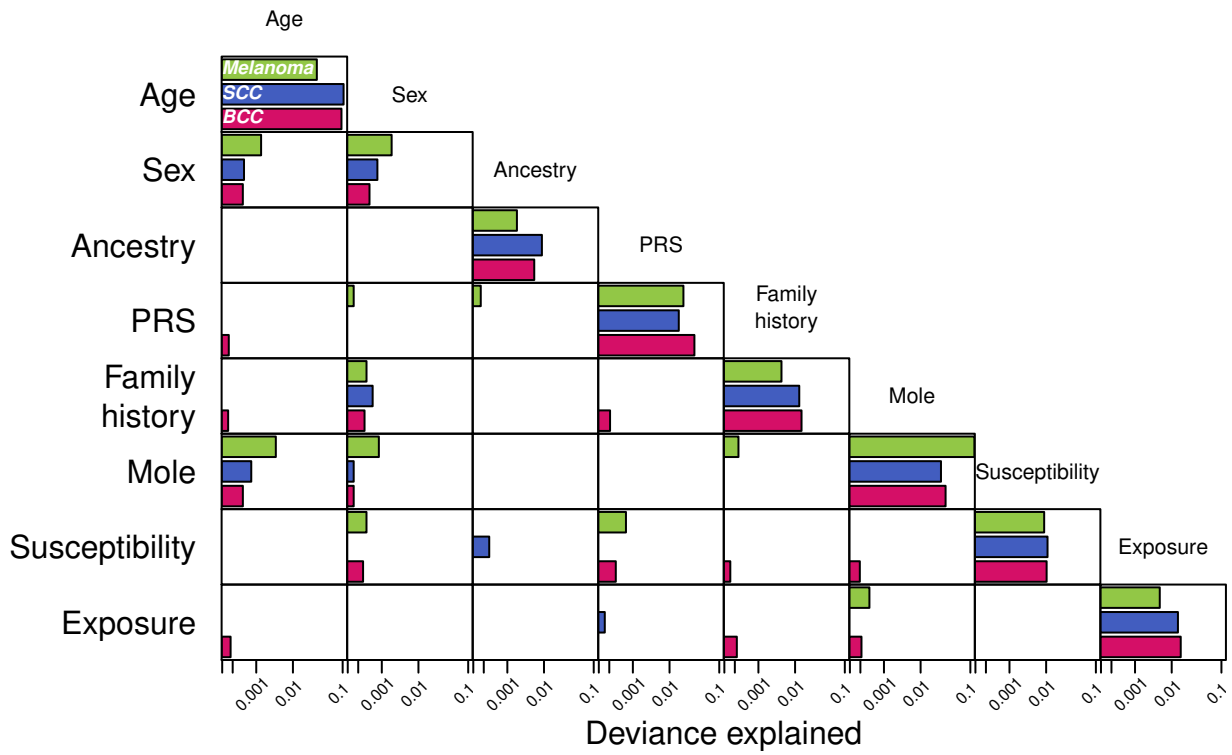

# Supplementary Figure 14: Comparison between a published melanoma PRS (Gu et al. 2018) and the melanoma PRS from this study

Gu et al. (2018) developed a melanoma PRS using 12,874 melanoma cases and 23,203 controls from the Melanoma Meta-Analysis Consortium as a training set, and 3102 cases and 2301 controls from the MelaNostrum consortium for validation. The Melanoma Meta-Analysis Consortium combined multiple cohorts from Europe, Australia and the United States. Cases were identified through clinicians, pathology or cancer registers, and cases were generally diagnosed with pathology or histopathology confirmed invasive, cutaneous melanoma. The MelaNostrum Consortium included cases with histologically confirmed primary cutaneous melanoma from Italy, Spain, Greece and Cyprus. The PRS included 204 SNPs and achieved an AUC = 0.644 (95% CI = 0.630–0.658). All 204 variants were present in 23andMe database and passed our quality control (QC) requirements. a) and b) are a comparison of the estimated effects (and 95% CI) of the 204 PRS variants in 23andMe training set and in Gu et al. (2018)'s publication. The two figures present the variants with a P-value < 1e-3 or > 1e-3, respectively, in 23andMe training set. c) and d) are the performance of Gu et al.'s PRS in 23andMe validation set. The dashed line used directly Gu et al.'s PRS weights from the publication. The solid line used effect estimates from the 23andMe training set. e) Comparison between melanoma PRS from this study (grouped by percentile bins) and Gu et al. (2018) melanoma PRS (mean and SD of percentiles) in the validation set.

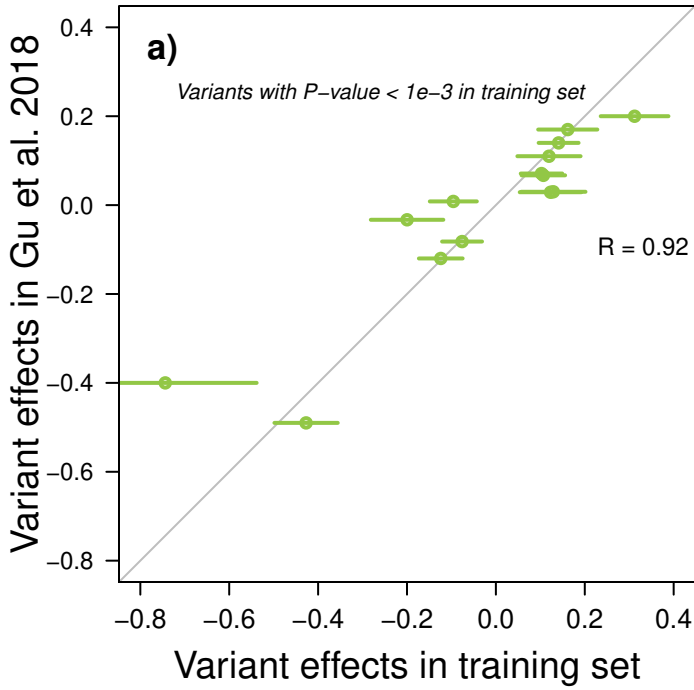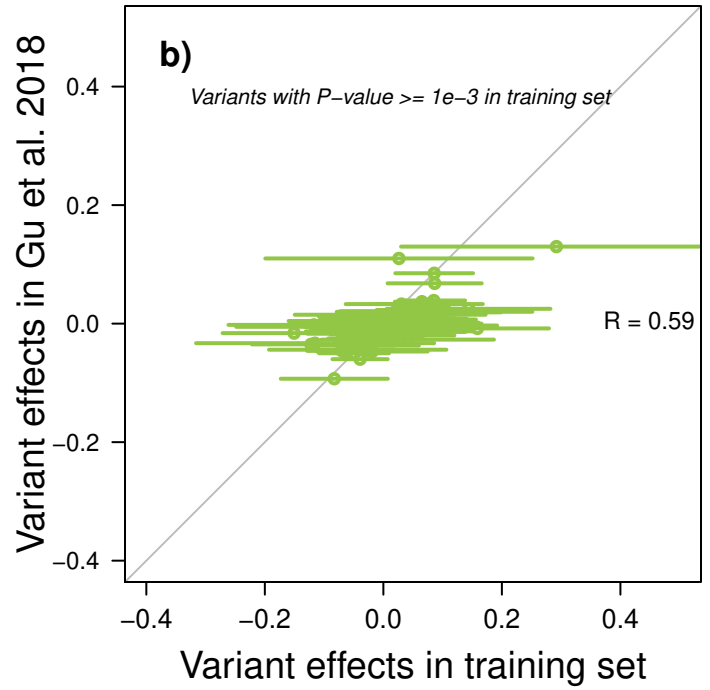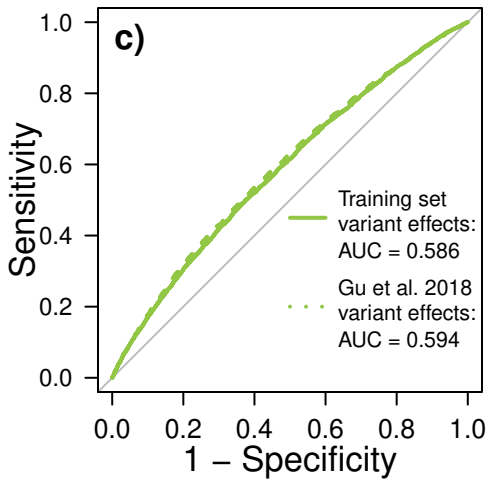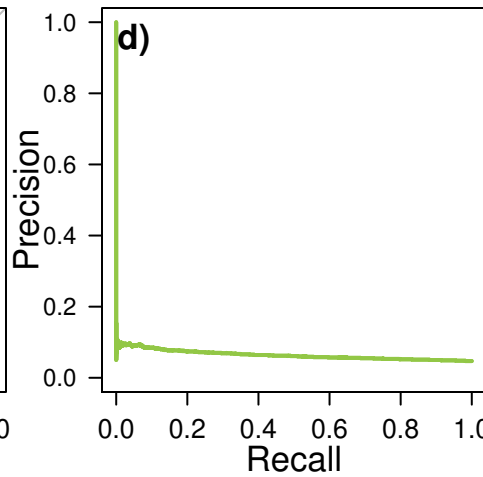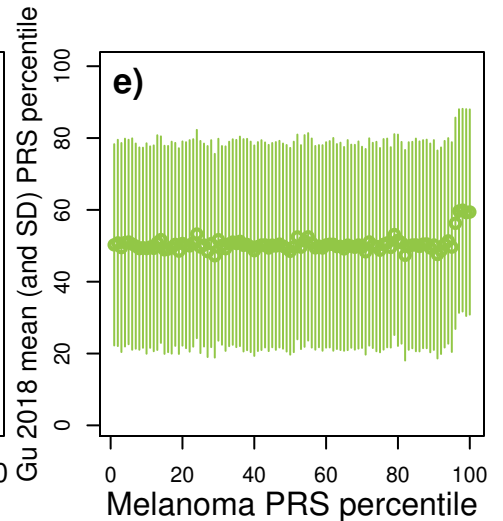

**Supplementary Figure 15: Prevalence of skin cancer per 5% DRS bins and AUC in the validation set, split by European ancestries.**

**European regions**

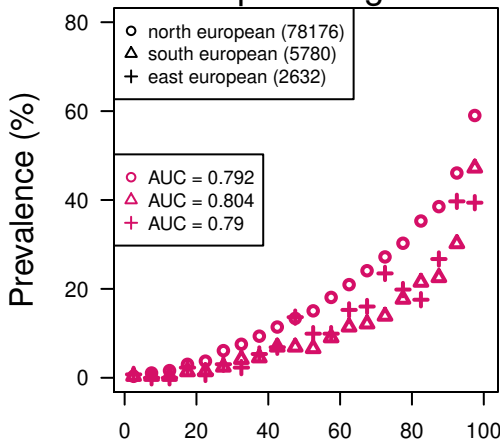

**North European**

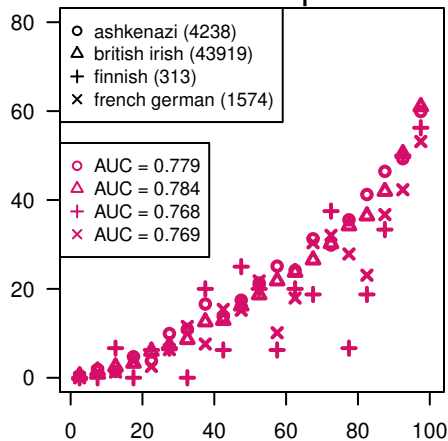

**South European**

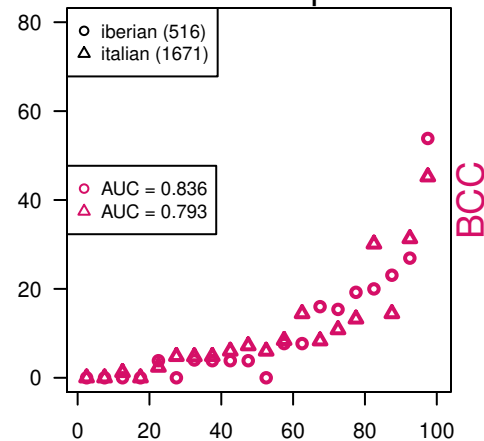

BCC

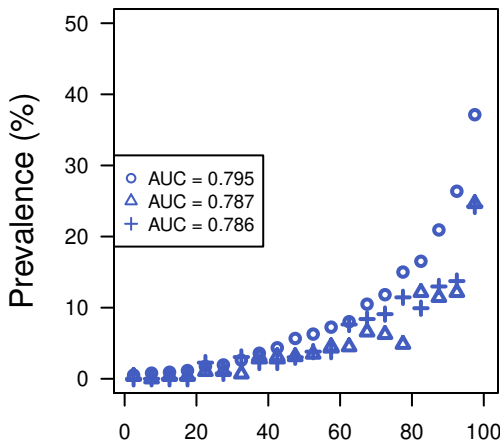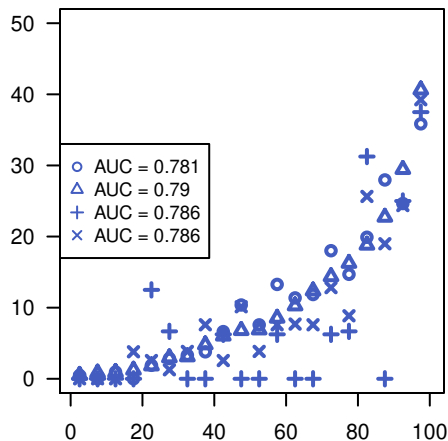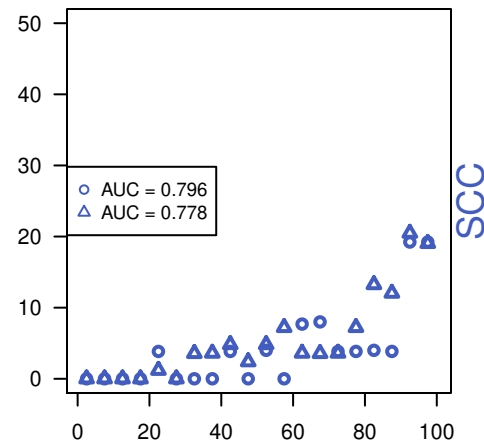

SCC

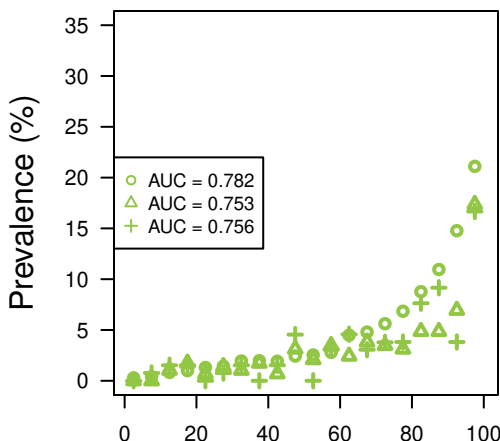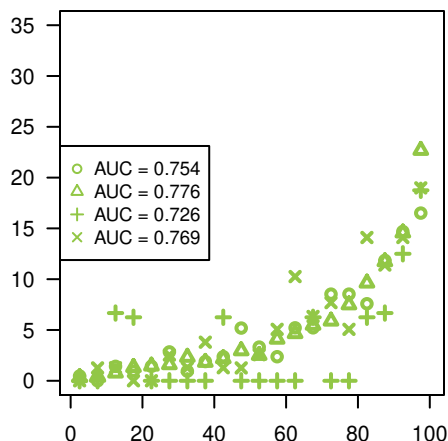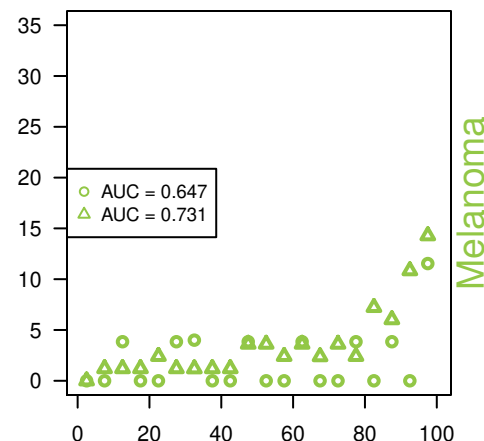

Melanoma

DRS percentile

**Supplementary Figure 16: Correlation matrix, in the training set, for the 32 factors included in the final models.**

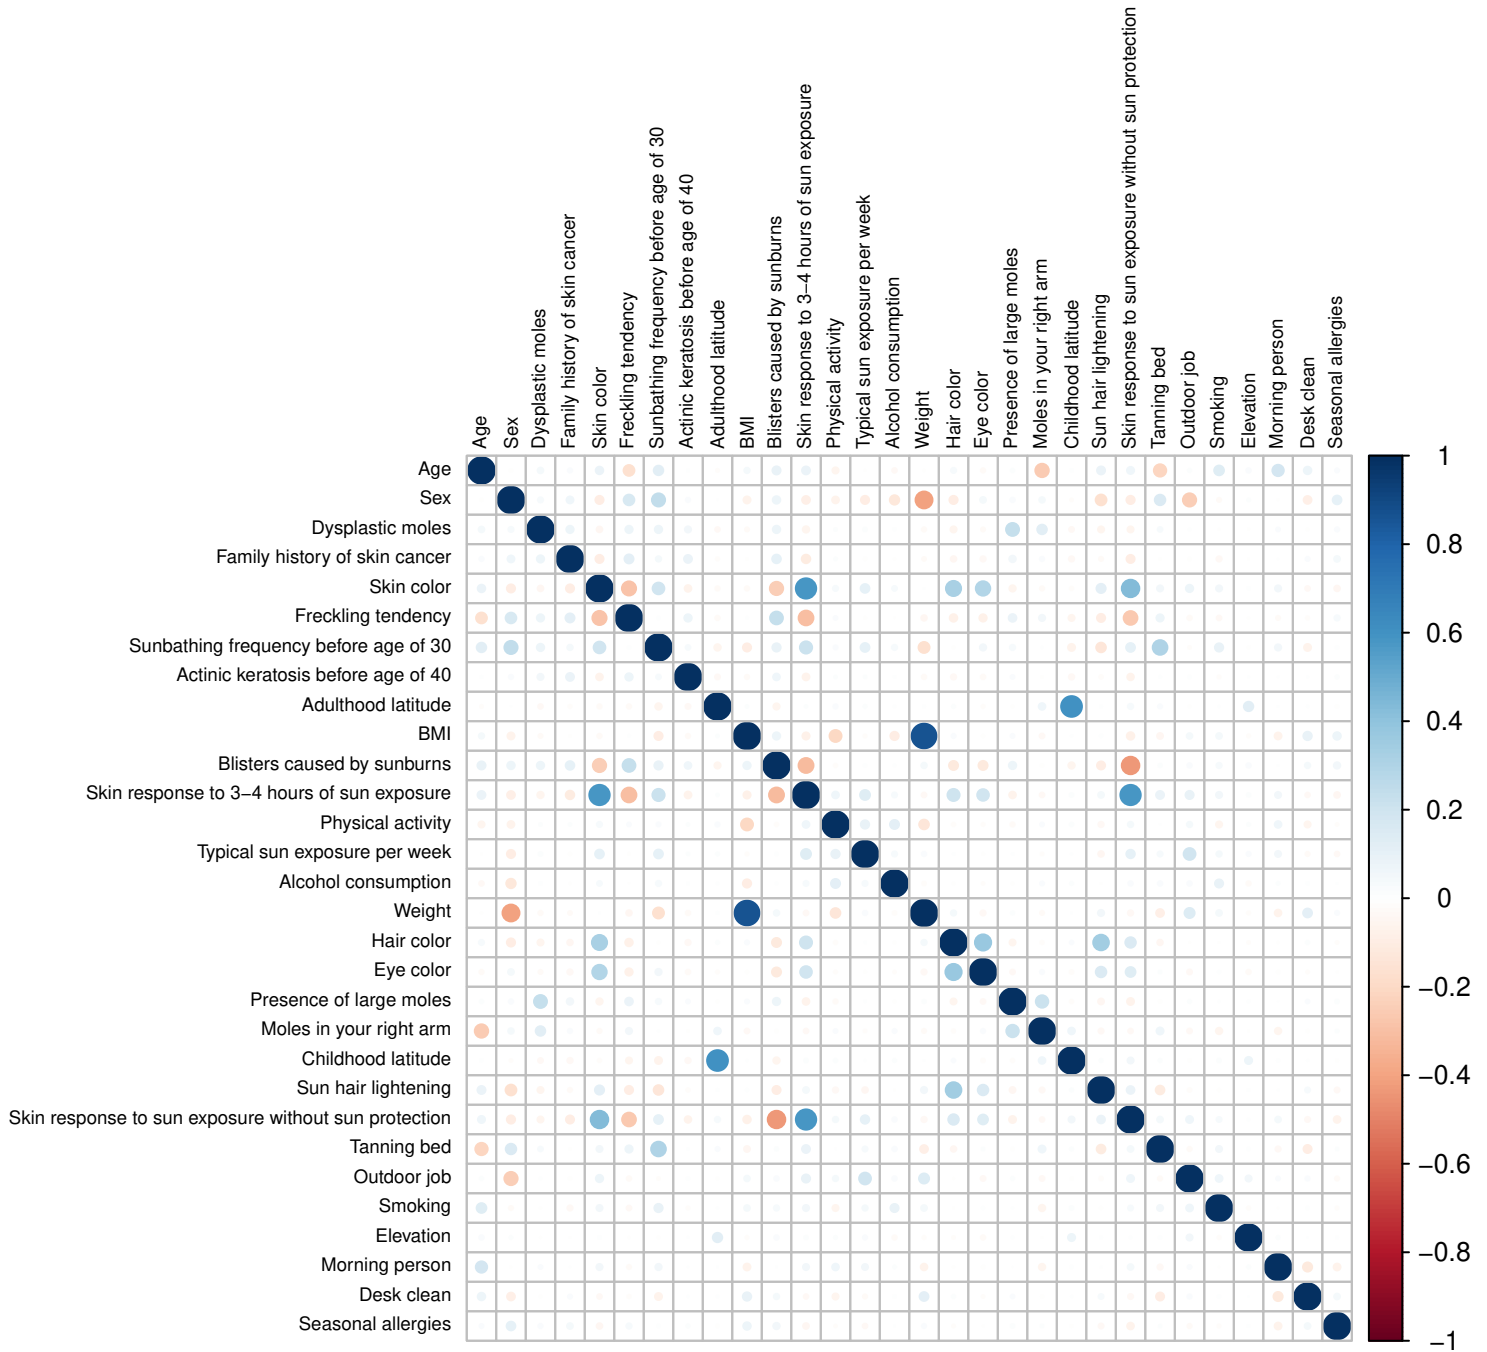

**Supplementary Figure 17: Proportion of DRSA percentile bins in each age class.**

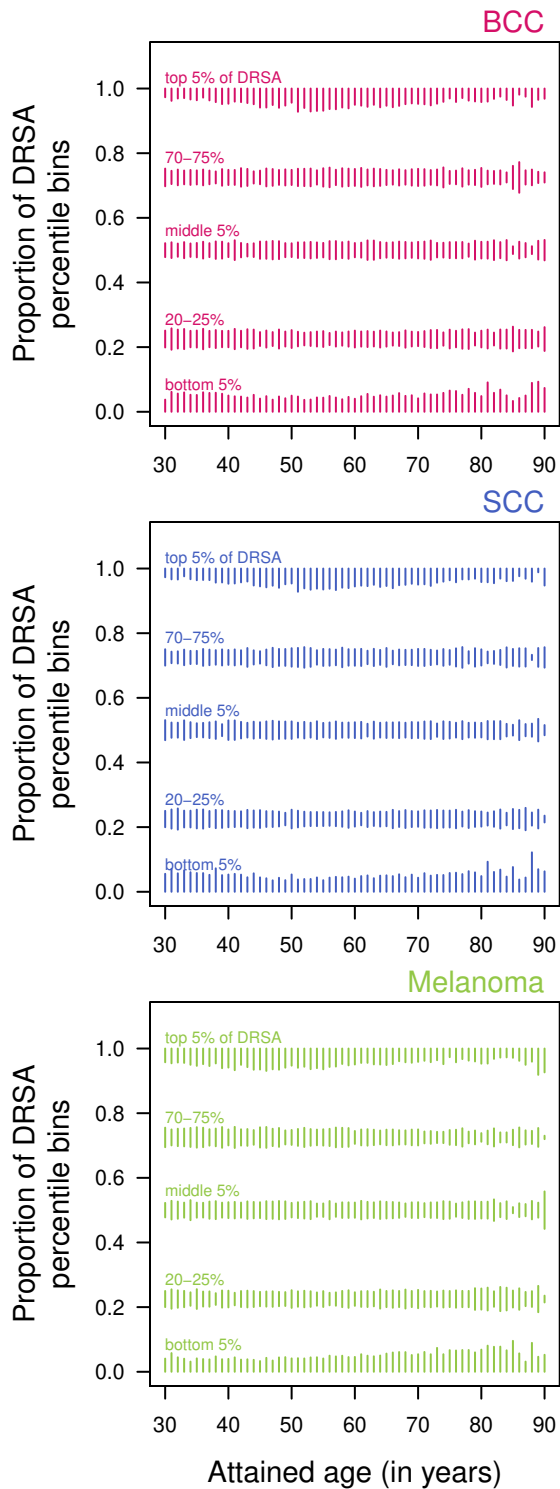



# Supplementary Figure 18: Expected and observed incidence rate in the 2-year follow-up for the bottom, middle, and top 5% DRSA.

The expected incidence rates were computed from the prevalences from the validation set (see Methods). The observed incidence rates were calculated using the 2-year follow-up survey for participants with baseline bottom, middle, and top 5% DRSA (circle, triangle, and cross, respectively).

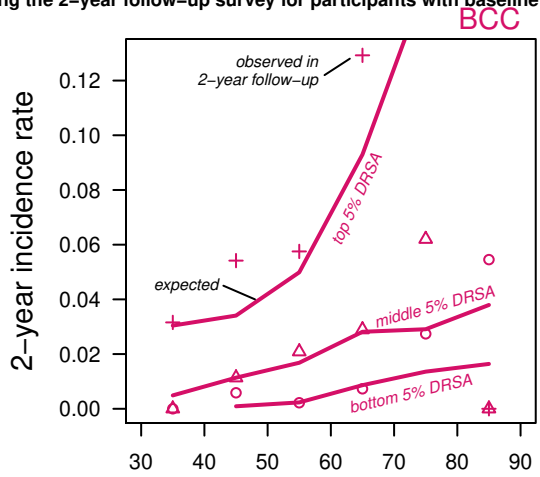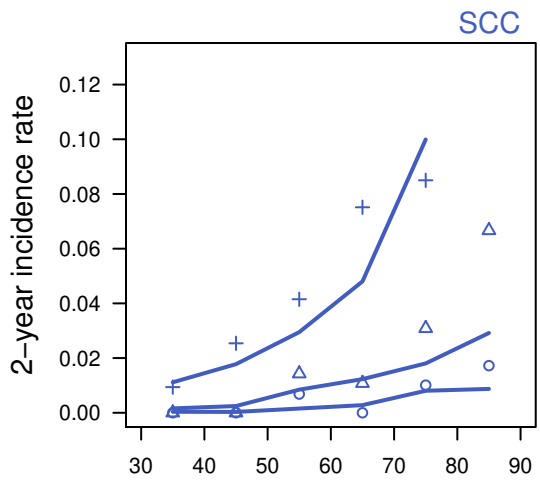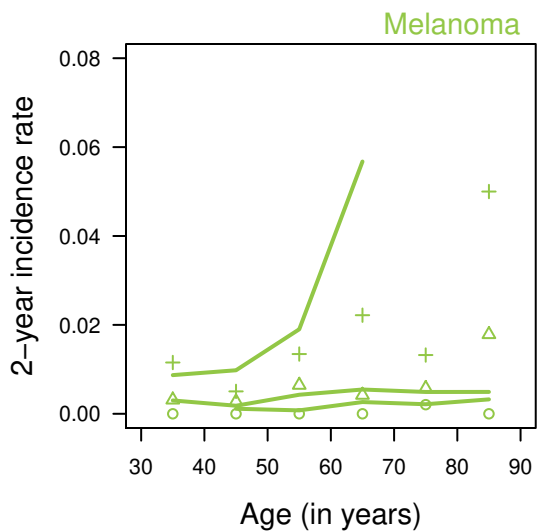

Supplementary Figure 19: Mean risk score contribution to DRSA scores across ages, for the bottom, middle, and top 5% DRSA.

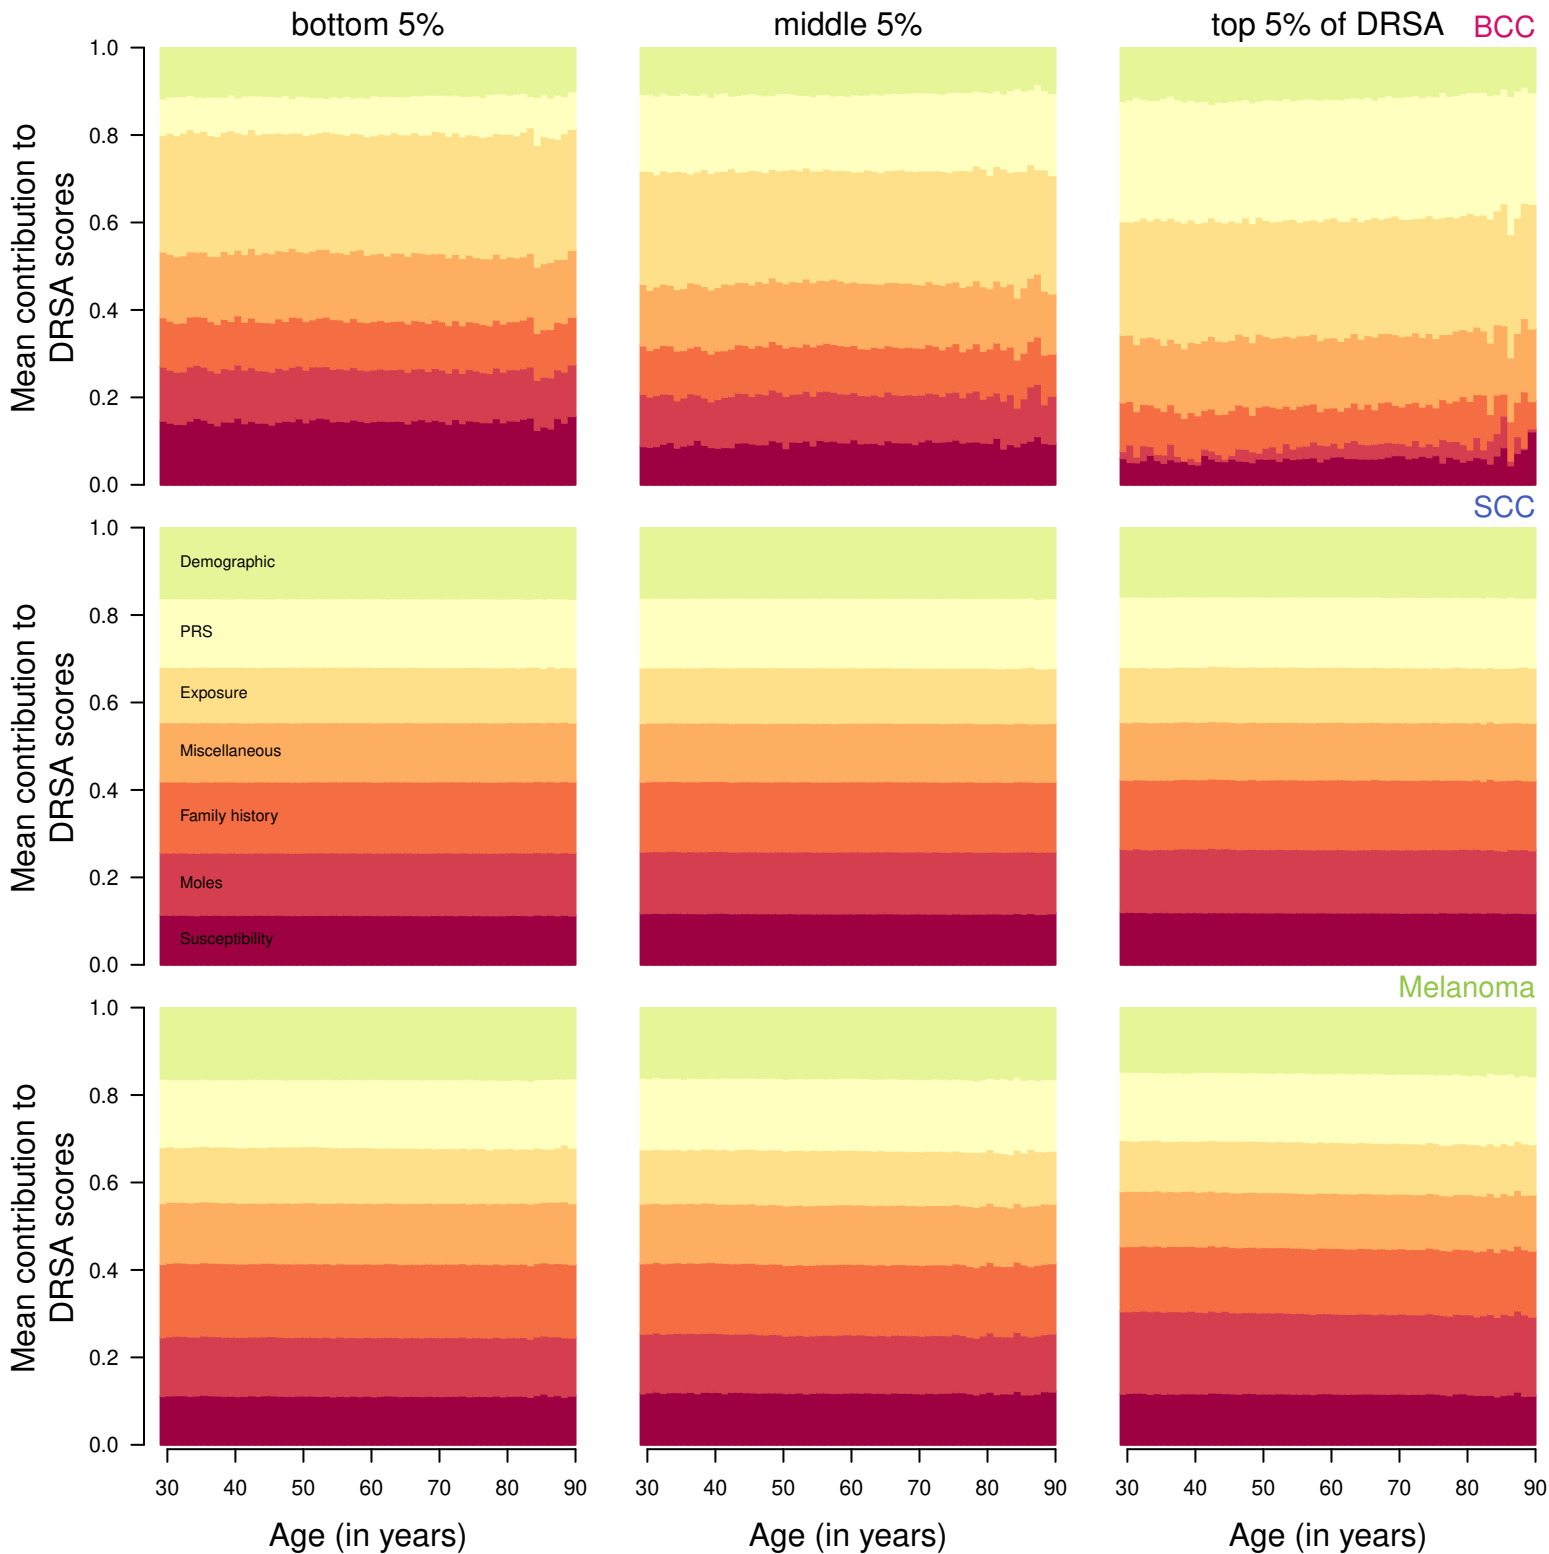

Supplement: 41467_2020_20246_MOESM1_ESM.pdf [file 41467_2020_20246_MOESM1_ESM.pdf]
